# Supplementary material for: Integration of Selection Signatures and Protein Interactions Reveals NR6A1, PAPPA2, and PIK3C2B as the Promising Candidate Genes Underlying the Characteristics of Licha Black Pig
Source: MDPI journal article supplement (doi:10.3390/biology12040500), 2023-03-25

Supplementary Materials

# Integration of Selection Signatures and Protein Interactions Reveals *NR6A1*, *PAPPA2*, and *PIK3C2B* as the Promising Candidate Genes Underlying the Characteristics of Licha Black Pig

**Figure S1.** Distribution of the sequenced SNPs on all autosome. The x-axis represents the corresponding chromosomal position (Mb), and the y-axis represents chromosomes. Different colors of each 1Mb genome block denote the number of SNPs.

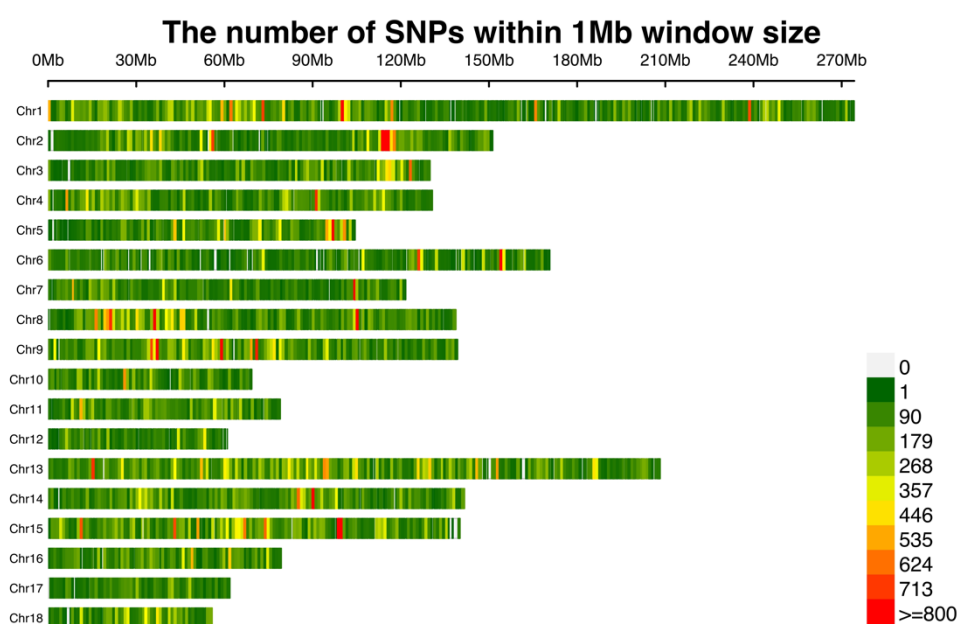

**Figure S2.** Population structures were inferred using ADMIXTURE with the assuming number of ancestral cluster K from 1 to 20.

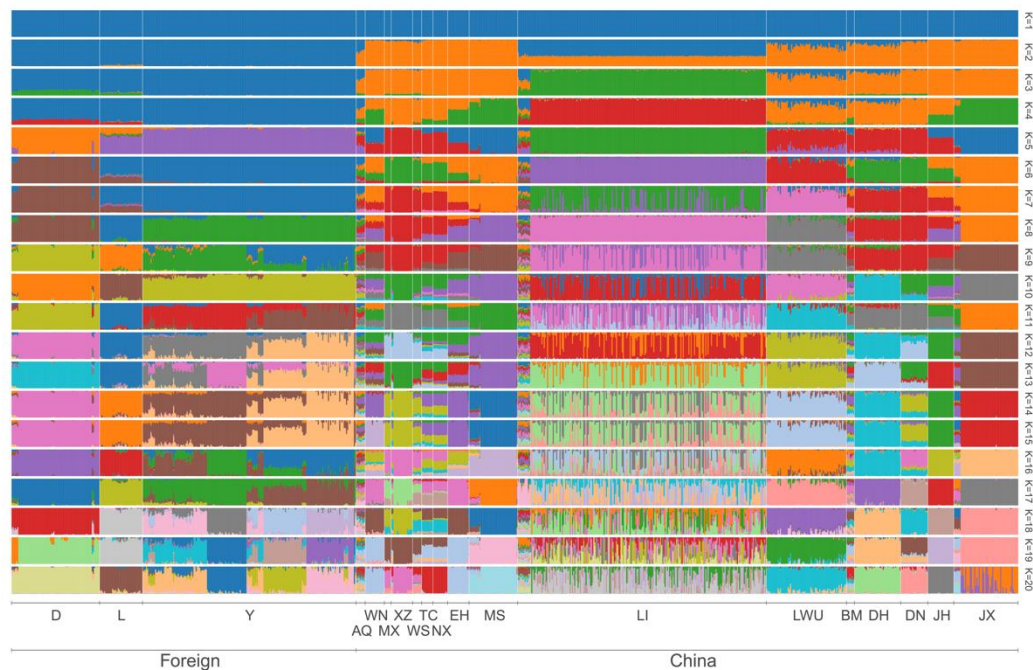

**Figure S3.** The number and coverage of ROH fragments on each chromosome. The x-axis represents chromosomes, the left y-axis represents the total number of runs of homozygosity (ROH) segments, and the right y-axis represents the coverage of ROH segments.

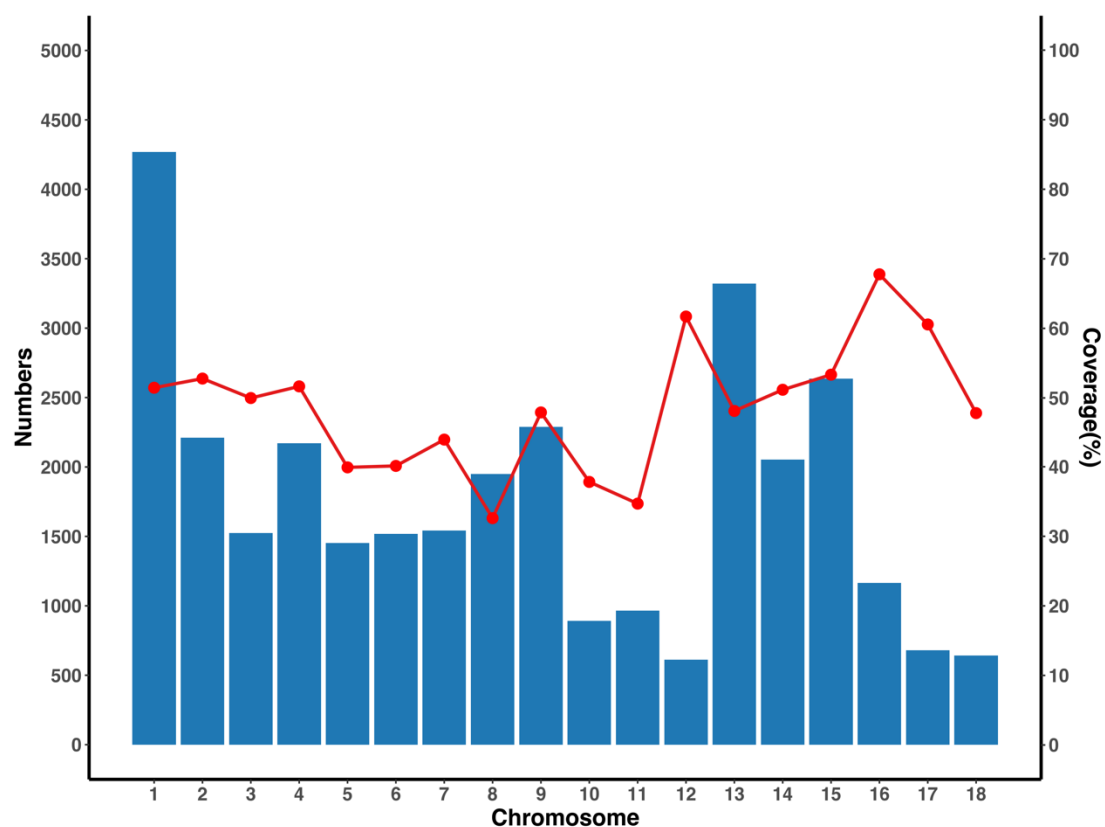

**Figure S4.** The number and length of ROH of all individuals in each breed. The x-axis represents the total number of runs of homozygosity (ROH) fragments for all individuals from each breed, and the y-axis represents the total length (Mb) of genome in such ROH for all individuals from each breed. Each dot represents an individual.

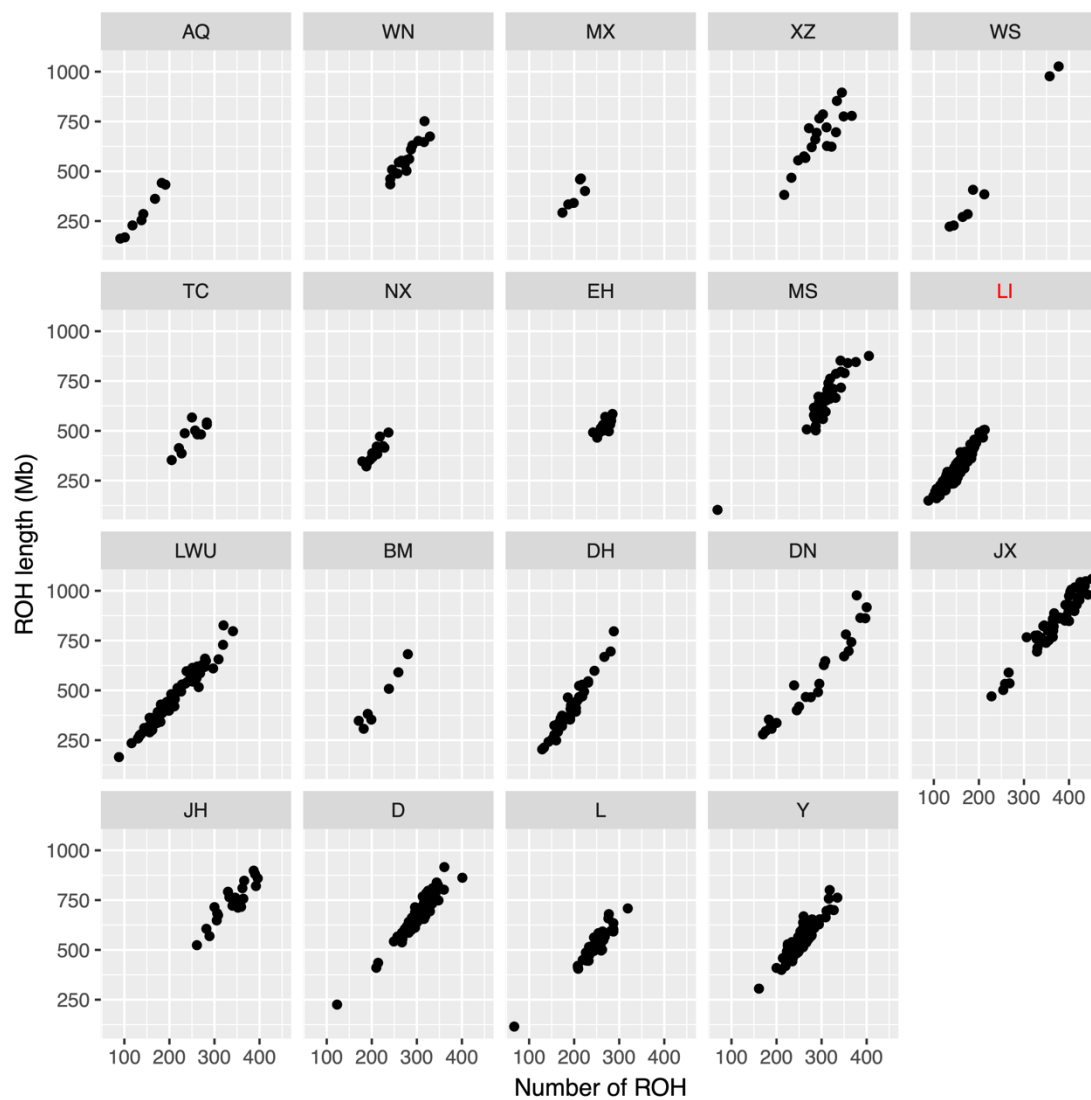

**Figure S5.** Venn diagram of the number distribution of candidate genes within LI pigs by three methods (ROH, haplotype and  $F_{ST}$ ). FST-1, the  $F_{ST}$  between LI pigs and other Chinese pigs. FST-2, the  $F_{ST}$  between LI pigs and commercial pigs.

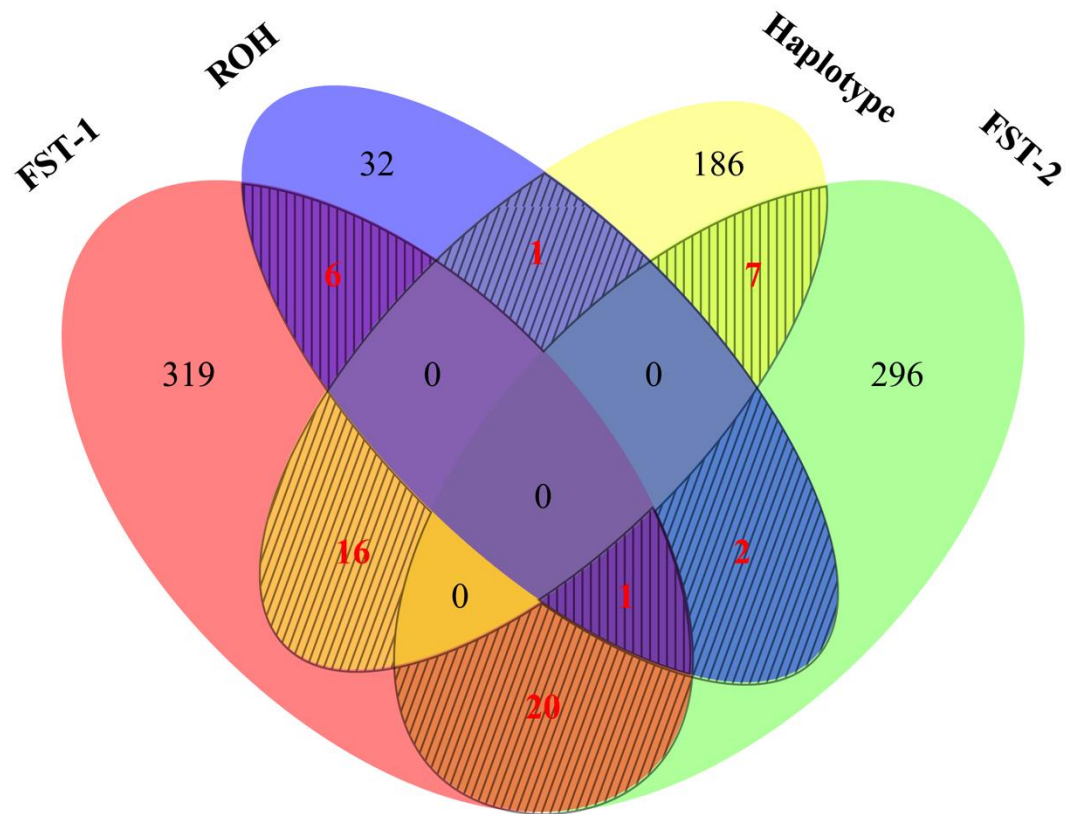

Supplement: s1 [file s1]
