# Supplementary material for: Integration of Selection Signatures and Protein Interactions Reveals NR6A1, PAPPA2, and PIK3C2B as the Promising Candidate Genes Underlying the Characteristics of Licha Black Pig
Source: Biology (Basel). 2023 Mar 25;12(4):500. doi: 10.3390/biology12040500 (PMC10135650; doi:10.3390/biology12040500)
Supplement: Supplementary file 1 [file biology-12-00500-s001.zip › biology-2211574- Supplementary Tables.xlsx]

## Sheet: Supplementary Table S1
Supplementary Table S1. Sample region and size for each population.
Region	Breed	Code	Size
Anhui	Anqing Six-end-white	AQ	8
	Wannan Black	WN	17
Guangxi	Bamaxiang	MX	6
Guizhou	Xiang	XZ	19
Hainan	Wuzhishan	WS	8
Hubei	Tongcheng	TC	10
Hunan	Ningxiang	NX	13
Jiangsu	Erhualian	EH	19
	Meishan	MS	43
Shandong	Licha Black	LI	220
	Laiwu	LWU	71
Shaanxi	Bamei	BM	7
Yunnan	Dahe	DH	41
	Diannan Small-ear	DN	24
Zhejiang	Jiangxing Black	JX	57
	Jinhua	JH	23
	Duroc	D	78
	Landrace	L	38
	Yorkshire	Y	189
Intensive commercial pigs do not belong to a specific region

## Sheet: Supplementary Table S2
Supplementary Table S2. Descriptive statistics of runs of homozygosity (ROH) number and length (in Mb) by ROH length class (ROH 1~5Mb, ROH 5~10Mb, ROH >10Mb and total) in LI pigs.
Classification	ROH number	percentage (%)	Average length (Mb)	SD	Genome coverage (%)
	30905	96.905	1.845	0.817	15.748
	879	2.756	6.343	1.201	7.83
	108	0.339	13.927	2.364	0.11
Total ( )	31892	100	2.009	1.315	19.314

## Sheet: Supplementary Table S3
Supplementary Table S3. List of 42 potential candidate genes within top 1% ROH islands in 220 LI pigs.
Chr	Gene Start (bp)	Gene End (bp)	Gene Name	Ensembl Gene ID
1	67214337	67294397	ENSSSCG00000004357	SIM1
1	67331941	67657085	ENSSSCG00000004358	ASCC3
1	68057737	68679278	ENSSSCG00000004361	GRIK2
1	70993341	71105012	ENSSSCG00000004364	HACE1
1	71495194	71701093	ENSSSCG00000004368	PREP
1	220841487	220953442	ENSSSCG00000005236	DMRT1
1	221015046	221218575	ENSSSCG00000005235	KANK1
1	221256009	221491953	ENSSSCG00000005240	DOCK8
1	221634524	221836483	ENSSSCG00000005243	PGM5
4	6282075	6446390	ENSSSCG00000005941	KHDRBS3
4	7016753	7374053	ENSSSCG00000030947	ZFAT
4	13445309	13451329	ENSSSCG00000005967	LRATD2
8	28801568	29009163	ENSSSCG00000008770	NWD2
8	29013082	29103161	ENSSSCG00000008771	C4orf19
8	29370481	29593274	ENSSSCG00000028983	TBC1D1
8	30024797	30060979	ENSSSCG00000036488	KLF3
8	30114602	30274165	ENSSSCG00000008785	FAM114A1
9	70335206	70430389	ENSSSCG00000015302	CFAP69
9	70499828	71310244	ENSSSCG00000015307	CDK14
13	70538894	70602455	ENSSSCG00000039010	WNT7A
13	70757265	70830388	ENSSSCG00000011609	FBLN2
13	70860656	70918005	ENSSSCG00000028031	HDAC11
13	70917452	71007271	ENSSSCG00000011610	NUP210
13	71030878	71366685	ENSSSCG00000027812	IQSEC1
13	71374961	71427131	ENSSSCG00000023354	ACAD9
13	71505035	71540592	ENSSSCG00000024000	EFCC1
13	71672733	71730399	ENSSSCG00000011616	COPG1
15	100539395	100634780	ENSSSCG00000016069	CCDC150
15	100733555	100820585	ENSSSCG00000016073	PGAP1
15	100868469	101211242	ENSSSCG00000016074	ANKRD44
15	45709710	45851421	ENSSSCG00000015786	PRIMPOL
15	45818943	45851441	ENSSSCG00000015785	CENPU
15	45866851	46090099	ENSSSCG00000015784	ACSL1
15	65806070	65820450	ENSSSCG00000015879	DAPL1
15	65920219	66203512	ENSSSCG00000015880	TANC1
15	66254948	66571077	ENSSSCG00000015882	BAZ2B
15	68224395	68656318	ENSSSCG00000015893	SLC4A10
15	68660849	68743818	ENSSSCG00000015894	DPP4
15	68830730	68902379	ENSSSCG00000015896	FAP
15	68928244	68985074	ENSSSCG00000015897	IFIH1
15	68985236	69053798	ENSSSCG00000027472	GCA
15	69059270	69554981	ENSSSCG00000015898	KCNH7

## Sheet: Supplementary Table S4
Supplementary Table S4. Block structure per chromosome in LI pigs.
Chr	Number of blocks	Total block length (Kb)	Mean block length (Kb)	Mix block length (Kb)	Max block length (Kb)	Number of SNP	Mean Number of SNP	Min Number of SNP	Max Number of SNP	Proportion SNPs (%)
1	1716	91328	53.2215	0.002	200.001	32462	18.9172	2	371	12.258
2	1005	44267.9	44.0477	0.002	200.001	19962	19.8627	2	618	7.53786
3	848	36092	42.5613	0.002	200.001	13235	15.6073	2	232	4.99768
4	849	39313.9	46.3061	0.002	200	15175	17.874	2	527	5.73024
5	624	30883	49.4919	0.002	200.001	12721	20.3862	2	383	4.80359
6	937	42050.1	44.8774	0.002	200.001	14159	15.111	2	480	5.34659
7	763	33487.5	43.8892	0.002	200	11166	14.6343	2	357	4.2164
8	898	48790.7	54.3326	0.002	200.001	19229	21.4131	2	419	7.26108
9	1029	48973.6	47.5934	0.002	200.001	19635	19.0816	2	406	7.41439
10	466	16490.7	35.3878	0.002	200	6702	14.382	2	322	2.53075
11	497	23620.5	47.5263	0.002	200.001	8807	17.7203	2	238	3.32562
12	388	14102.6	36.3469	0.004	199.992	4867	12.5438	2	265	1.83783
13	1346	79164.3	58.8145	0.002	200.001	28939	21.5	2	327	10.9277
14	957	52286.9	54.6362	0.002	200.001	16328	17.0617	2	305	6.16563
15	993	50748.8	51.1066	0.002	200.001	21721	21.8741	2	447	8.20208
16	594	23632.9	39.786	0.002	200	8491	14.2946	2	232	3.20629
17	382	14461.6	37.8576	0.002	199.996	4549	11.9084	2	169	1.71775
18	390	17462.4	44.7755	0.002	200	6675	17.1154	2	280	2.52055
TOTAL	14682	707157	48.1649	0.002	200.001	264823	18.0373	2	618	100

## Sheet: Supplementary Table S5
Supplementary Table S5. List of 210 potential candidate genes within top 1% haplotype blocks in 220 LI pigs.
Chr	Gene Start (bp)	Gene End (bp)	Gene Name	Ensembl Gene ID
1	73184753	73360113	ENSSSCG00000031159	BEND3
1	73235097	73510573	ENSSSCG00000036168	PDSS2
1	73549307	73722403	ENSSSCG00000004379	SOBP
1	89835944	89986396	ENSSSCG00000004477	IMPG1
1	99848184	99917328	ENSSSCG00000004516	MBD1
1	100107935	100291585	ENSSSCG00000004520	MAPK4
1	100340048	100512463	ENSSSCG00000004521	MRO
1	165853126	166087240	ENSSSCG00000004958	PIAS1
1	166085990	166099834	ENSSSCG00000026517	CALML4
1	166107228	166126584	ENSSSCG00000004957	CLN6
1	166162883	166175937	ENSSSCG00000022419	FEM1B
1	166173135	166310972	ENSSSCG00000004961	ITGA11
1	238516058	238541706	ENSSSCG00000005354	TRMT10B
1	238536343	238541333	ENSSSCG00000005355	EXOSC3
1	238567589	238633471	ENSSSCG00000005356	DCAF10
1	238637876	238667617	ENSSSCG00000032554	SLC25A51
2	79491655	79549926	ENSSSCG00000027351	ZNF454
2	79512749	79549938	ENSSSCG00000029380	ZFP2
2	79579738	79601137	ENSSSCG00000028295	ZNF354B
2	79627603	79631270	ENSSSCG00000029569	PROP1
2	112989145	113480210	ENSSSCG00000014190	FBXL17
2	113774412	114206930	ENSSSCG00000027074	FER
2	114319988	114675691	ENSSSCG00000022845	PJA2
2	114675916	114856055	ENSSSCG00000014195	MAN2A1
2	115279103	115523582	ENSSSCG00000014196	TMEM232
2	115835104	115908374	ENSSSCG00000014199	WDR36
2	115910423	116229758	ENSSSCG00000037019	CAMK4
2	115910423	116229758	ENSSSCG00000037019	CAMK4
2	116287198	116741955	ENSSSCG00000014203	MCC
2	123313448	123402731	ENSSSCG00000028431	HSD17B4
2	123459036	123466709	ENSSSCG00000014228	FAM170A
2	136883854	136952177	ENSSSCG00000014304	SEC24A
2	136957624	136968381	ENSSSCG00000038955	CAMLG
2	136972507	137030430	ENSSSCG00000026644	DDX46
2	136992799	137049449	ENSSSCG00000034954	C5orf24
2	137060893	137080107	ENSSSCG00000026106	TXNDC15
3	93081219	93163628	ENSSSCG00000008428	MSH2
3	93168852	93185653	ENSSSCG00000008429	EPCAM
3	112478027	112581100	ENSSSCG00000037751	OTOF
3	112581770	112621601	ENSSSCG00000008568	DRC1
3	112628746	112671085	ENSSSCG00000030643	SELENOI
3	112671204	112705296	ENSSSCG00000008570	ADGRF3
3	112704023	112753086	ENSSSCG00000008569	HADHB
3	113997236	114251078	ENSSSCG00000008581	NCOA1
4	55096404	55101897	ENSSSCG00000040681	FABP4
4	55116340	55119825	ENSSSCG00000033728	FABP9
4	55118864	55142036	ENSSSCG00000036441	PMP2
4	82663581	82697813	ENSSSCG00000006299	TBX19
4	82712896	82734487	ENSSSCG00000031617	SFT2D2
4	82756044	82794715	ENSSSCG00000006301	TIPRL
4	82844957	83016417	ENSSSCG00000006302	GPR161
4	91402011	91491555	ENSSSCG00000006423	OR6N2
4	91416410	91433243	ENSSSCG00000037532	MNDA
4	91485067	91640063	ENSSSCG00000006431	SPTA1
4	91485068	91543128	ENSSSCG00000050576	OR6K3
4	91508908	91509939	ENSSSCG00000006425	OR6K6
4	108401895	108621509	ENSSSCG00000026680	KCND3
5	43043206	43087635	ENSSSCG00000022611	CAPRIN2
5	43099749	43182803	ENSSSCG00000000534	IPO8
5	45973693	46030453	ENSSSCG00000000547	MRPS35
5	46031400	46222838	ENSSSCG00000000549	PPFIBP1
5	60149028	60314689	ENSSSCG00000000625	LRP6
5	60332451	60357897	ENSSSCG00000000623	BCL2L14
5	60394656	60776750	ENSSSCG00000024152	ETV6
5	60394656	60776750	ENSSSCG00000024152	ETV6
5	60394656	60776750	ENSSSCG00000024152	ETV6
5	96762592	96784972	ENSSSCG00000036744	ALX1
5	96801326	97093718	ENSSSCG00000000934	LRRIQ1
5	99226017	99358587	ENSSSCG00000000941	METTL25
5	99358338	99364091	ENSSSCG00000038987	CCDC59
5	100270038	100429204	ENSSSCG00000000939	ACSS3
5	100538065	100681323	ENSSSCG00000040348	LIN7A
6	29842819	29873792	ENSSSCG00000034721	CES5A
6	29931664	29980823	ENSSSCG00000002827	SLC6A2
6	29998488	30056862	ENSSSCG00000002828	LPCAT2
6	73117221	73239452	ENSSSCG00000020710	PRDM2
6	73297158	74402790	ENSSSCG00000037676	KAZN
6	107282847	107314634	ENSSSCG00000003702	GATA6
6	125890708	126043161	ENSSSCG00000003749	PIK3C3
6	131727083	132366088	ENSSSCG00000003761	ADGRL2
6	154936439	155374403	ENSSSCG00000003833	DAB1
6	160986081	161031140	ENSSSCG00000031188	C1orf185
6	161160291	161166527	ENSSSCG00000003876	CDKN2C
6	161166996	161603725	ENSSSCG00000003877	FAF1
7	15532747	15643692	ENSSSCG00000001078	MBOAT1
7	15910666	16685053	ENSSSCG00000001080	CDKAL1
7	104218301	104283244	ENSSSCG00000002414	SEL1L
8	11215659	11317312	ENSSSCG00000008745	PROM1
8	11365431	11416289	ENSSSCG00000021828	TAPT1
8	15211916	16346170	ENSSSCG00000023934	KCNIP4
8	15211916	16346170	ENSSSCG00000023934	KCNIP4
8	30114602	30274165	ENSSSCG00000008785	FAM114A1
8	30124895	30134854	ENSSSCG00000027877	TLR10
8	30147621	30155466	ENSSSCG00000026583	TLR1
8	30159754	30180650	ENSSSCG00000026592	TLR6
8	30289407	30342607	ENSSSCG00000023785	TMEM156
8	31321113	31372364	ENSSSCG00000008794	RHOH
8	31443043	31456384	ENSSSCG00000024428	CHRNA9
8	31508508	31810359	ENSSSCG00000008796	RBM47
8	32433030	32792546	ENSSSCG00000008799	LIMCH1
8	36347023	36502460	ENSSSCG00000028922	GABRA2
8	50264272	51052864	ENSSSCG00000027183	FSTL5
8	104808940	105005400	ENSSSCG00000009112	SEC24D
8	105015420	105053563	ENSSSCG00000009113	METTL14
8	105121388	105197142	ENSSSCG00000009114	PRSS12
9	33720877	34039950	ENSSSCG00000033937	DYNC2H1
9	36620658	36759554	ENSSSCG00000025606	ATM
9	36769342	36849575	ENSSSCG00000015008	C11orf65
9	36852560	36879483	ENSSSCG00000015009	POGLUT3
9	36885212	37006396	ENSSSCG00000015010	EXPH5
9	59037708	60140445	ENSSSCG00000037534	OPCML
9	59037708	60140445	ENSSSCG00000037534	OPCML
9	59037708	60140445	ENSSSCG00000037534	OPCML
9	67123265	67147992	ENSSSCG00000015644	IKBKE
9	67157167	67237367	ENSSSCG00000031970	RASSF5
10	26627325	26703225	ENSSSCG00000027312	PTCH1
11	12576562	12600665	ENSSSCG00000040557	SERTM1
11	15317124	15410473	ENSSSCG00000009370	FOXO1
11	15450702	15472314	ENSSSCG00000009372	MRPS31
11	15494385	15559312	ENSSSCG00000009373	SLC25A15
12	6047340	6074478	ENSSSCG00000017211	GGA3
12	6047701	6072407	ENSSSCG00000017209	MIF4GD
12	6052063	6055668	ENSSSCG00000035134	MRPS7
12	6064567	6103979	ENSSSCG00000017207	NUP85
12	6116606	6130350	ENSSSCG00000017212	SUMO2
12	6139439	6164142	ENSSSCG00000028210	NT5C
12	6153545	6183102	ENSSSCG00000017214	ARMC7
12	6185515	6226455	ENSSSCG00000017215	SLC16A5
12	6226372	6241318	ENSSSCG00000031958	KCTD2
13	10900718	11359544	ENSSSCG00000036033	THRB
13	24624417	24659639	ENSSSCG00000025783	ENTPD3
13	24700633	24715875	ENSSSCG00000011271	ZNF619
13	24737062	24744558	ENSSSCG00000026550	ZNF621
13	32756680	32796998	ENSSSCG00000011402	IFRD2
13	32789421	32796563	ENSSSCG00000024363	HYAL3
13	32793569	32800796	ENSSSCG00000011404	HYAL1
13	32805223	32815335	ENSSSCG00000011405	HYAL2
13	32816154	32825369	ENSSSCG00000011407	RASSF1
13	32825369	32830049	ENSSSCG00000011408	ZMYND10
13	32825597	32837002	ENSSSCG00000011410	CYB561D2
13	32830900	32842806	ENSSSCG00000043195	TMEM115
13	32845115	32988774	ENSSSCG00000011412	CACNA2D2
13	70336900	70348652	ENSSSCG00000011601	LSM3.00
13	70348864	70397782	ENSSSCG00000011602	XPC
13	70393219	70417168	ENSSSCG00000011603	TMEM43
13	70417326	70428922	ENSSSCG00000011604	CHCHD4
13	75905610	76345564	ENSSSCG00000024492	EPHB1
13	77321872	77863493	ENSSSCG00000011652	STAG1
13	77825178	77861774	ENSSSCG00000021508	SLC35G2
13	77863701	77986156	ENSSSCG00000025701	NCK1
13	80429639	80556790	ENSSSCG00000031142	NMNAT3
13	81867740	81926762	ENSSSCG00000034369	SPSB4
13	81970447	82046032	ENSSSCG00000011670	PXYLP1
13	82064565	82195095	ENSSSCG00000022073	ZBTB38
13	82752446	82937683	ENSSSCG00000037647	TFDP2
13	82947341	83035531	ENSSSCG00000011677	GK5
13	83065934	83174537	ENSSSCG00000011678	XRN1
13	94155657	94345564	ENSSSCG00000024205	ARHGEF26
13	95019081	95126045	ENSSSCG00000011723	MME
13	117370543	117386268	ENSSSCG00000038443	ZNF639
13	117404699	117442481	ENSSSCG00000039285	MFN1
13	117444945	117513329	ENSSSCG00000037583	GNB4
13	125782471	126489650	ENSSSCG00000011811	LPP
13	136438962	136501872	ENSSSCG00000025349	CCDC14
13	136508808	136809674	ENSSSCG00000011867	MYLK
13	146474209	146623356	ENSSSCG00000021271	CFAP44
13	185176885	185679885	ENSSSCG00000012020	NCAM2
14	28301294	28393565	ENSSSCG00000009759	SCARB1
14	31368687	31657305	ENSSSCG00000009818	IFT81
14	31415192	31476472	ENSSSCG00000009817	P2RX7
14	42420176	42468065	ENSSSCG00000031346	CMKLR1
14	42460470	42584135	ENSSSCG00000039261	WSCD2
14	85544126	85677932	ENSSSCG00000010351	CCSER2
14	86539896	87227394	ENSSSCG00000010352	GRID1
14	87492453	87588570	ENSSSCG00000010357	WAPL
14	87644240	87722245	ENSSSCG00000010358	OPN4
14	87644242	87722251	ENSSSCG00000010359	LDB3
14	90338503	90480986	ENSSSCG00000010396	PARG
14	90503746	90536009	ENSSSCG00000010399	NCOA4
14	90533103	90582765	ENSSSCG00000010400	MSMB
14	90641243	90710509	ENSSSCG00000010402	ZFAND4
15	3659015	4096248	ENSSSCG00000015667	MBD5
15	4096646	4171845	ENSSSCG00000015668	ORC4
15	4173805	4259706	ENSSSCG00000015669	ACVR2A
15	9613539	11499965	ENSSSCG00000023746	LRP1B
15	20619778	22011997	ENSSSCG00000015711	DPP10
15	59066603	59108777	ENSSSCG00000022197	HS6ST1
15	59141588	59265047	ENSSSCG00000015857	UGGT1
15	64455989	64529107	ENSSSCG00000015873	ACVR1C
15	66649049	66700433	ENSSSCG00000015883	MARCHF7
15	66696744	66732626	ENSSSCG00000036050	CD302
15	66740078	66847578	ENSSSCG00000021956	LY75
15	99584839	99726404	ENSSSCG00000031954	SLC39A10
15	99724828	99987004	ENSSSCG00000032814	DNAH7
15	99724828	99987004	ENSSSCG00000032814	DNAH7
15	100029994	100078779	ENSSSCG00000016067	STK17B
16	61856212	61872359	ENSSSCG00000017027	GABRA6
16	61984924	62239937	ENSSSCG00000033558	GABRB2
16	75217213	75260149	ENSSSCG00000017102	TENT4A
16	75335246	75367184	ENSSSCG00000017104	NSUN2
17	21769484	21903269	ENSSSCG00000007072	SPTLC3
17	48714183	48815123	ENSSSCG00000035906	SLC13A3
17	48743623	48817825	ENSSSCG00000007452	TP53RK
17	48824414	48843201	ENSSSCG00000007451	SLC2A10
18	20261476	20653590	ENSSSCG00000016590	SND1
18	20673167	20680287	ENSSSCG00000016591	PAX4
18	20686746	20693552	ENSSSCG00000016592	FSCN3
18	20695476	20698726	ENSSSCG00000016593	ARF5
18	20701737	20707138	ENSSSCG00000035211	GCC1
18	37416981	37793057	ENSSSCG00000016657	AOAH
18	37416993	37793056	ENSSSCG00000016659	KIAA0895

## Sheet: Supplementary Table S6
Supplementary Table S6. List of 326 potential candidate genes in the first 1% of Fst in LI pigs compared with commercial pigs.
SNP name	Chr	Pos	strand	Gene Name	Ensembl Gene ID	Fst
1_3148231	1	3148231	+	ENSSSCG00000004027	PDE10A	0.666681
1_3177033	1	3177033	+	ENSSSCG00000004027	PDE10A	0.66808
1_21692666	1	21692666	-	ENSSSCG00000004132	PHACTR2	0.661012
1_21692693	1	21692693	-	ENSSSCG00000004132	PHACTR2	0.661012
1_21692714	1	21692714	-	ENSSSCG00000004132	PHACTR2	0.66488
1_21750019	1	21750019	+	ENSSSCG00000004133	FUCA2	0.620687
1_21750288	1	21750288	+	ENSSSCG00000004133	FUCA2	0.641754
1_29682063	1	29682063	+	ENSSSCG00000021443	SGK1	0.619174
1_86371462	1	86371462	-	ENSSSCG00000032015	SH3BGRL2	0.648367
1_111094432	1	111094432	+	ENSSSCG00000004576	RORA	0.738072
1_111094906	1	111094906	+	ENSSSCG00000004576	RORA	0.746269
1_111095326	1	111095326	+	ENSSSCG00000004576	RORA	0.744213
1_114835392	1	114835392	-	ENSSSCG00000004600	TCF12	0.71585
1_115815493	1	115815493	+	ENSSSCG00000004603	RFX7	0.891644
1_115815556	1	115815556	+	ENSSSCG00000004603	RFX7	0.878407
1_117458636	1	117458636	-	ENSSSCG00000004614	UNC13C	0.710416
1_117458716	1	117458716	-	ENSSSCG00000004614	UNC13C	0.710416
1_117494206	1	117494206	-	ENSSSCG00000004614	UNC13C	0.650175
1_117495835	1	117495835	-	ENSSSCG00000004614	UNC13C	0.712618
1_117501441	1	117501441	-	ENSSSCG00000004614	UNC13C	0.710406
1_117503479	1	117503479	-	ENSSSCG00000004614	UNC13C	0.712618
1_117504600	1	117504600	-	ENSSSCG00000004614	UNC13C	0.710416
1_117505353	1	117505353	-	ENSSSCG00000004614	UNC13C	0.711126
1_117509941	1	117509941	-	ENSSSCG00000004614	UNC13C	0.710416
1_117513624	1	117513624	-	ENSSSCG00000004614	UNC13C	0.694937
1_117513662	1	117513662	-	ENSSSCG00000004614	UNC13C	0.710416
1_117514493	1	117514493	-	ENSSSCG00000004614	UNC13C	0.717037
1_117514649	1	117514649	-	ENSSSCG00000004614	UNC13C	0.719234
1_117514802	1	117514802	-	ENSSSCG00000004614	UNC13C	0.712618
1_117515404	1	117515404	-	ENSSSCG00000004614	UNC13C	0.647925
1_117515535	1	117515535	-	ENSSSCG00000004614	UNC13C	0.647925
1_117515849	1	117515849	-	ENSSSCG00000004614	UNC13C	0.707506
1_117515962	1	117515962	-	ENSSSCG00000004614	UNC13C	0.710416
1_117516120	1	117516120	-	ENSSSCG00000004614	UNC13C	0.713332
1_117516178	1	117516178	-	ENSSSCG00000004614	UNC13C	0.710416
1_117516442	1	117516442	-	ENSSSCG00000004614	UNC13C	0.710416
1_117516491	1	117516491	-	ENSSSCG00000004614	UNC13C	0.70236
1_117517168	1	117517168	-	ENSSSCG00000004614	UNC13C	0.710416
1_117517948	1	117517948	-	ENSSSCG00000004614	UNC13C	0.650175
1_117518959	1	117518959	-	ENSSSCG00000004614	UNC13C	0.647925
1_117519060	1	117519060	-	ENSSSCG00000004614	UNC13C	0.710416
1_117519541	1	117519541	-	ENSSSCG00000004614	UNC13C	0.713332
1_117519928	1	117519928	-	ENSSSCG00000004614	UNC13C	0.710416
1_117520640	1	117520640	-	ENSSSCG00000004614	UNC13C	0.710416
1_117521451	1	117521451	-	ENSSSCG00000004614	UNC13C	0.650175
1_117522627	1	117522627	-	ENSSSCG00000004614	UNC13C	0.710416
1_117523033	1	117523033	-	ENSSSCG00000004614	UNC13C	0.710416
1_117525568	1	117525568	-	ENSSSCG00000004614	UNC13C	0.710416
1_117527684	1	117527684	-	ENSSSCG00000004614	UNC13C	0.647925
1_117531478	1	117531478	-	ENSSSCG00000004614	UNC13C	0.694937
1_117532718	1	117532718	-	ENSSSCG00000004614	UNC13C	0.63437
1_117543070	1	117543070	-	ENSSSCG00000004614	UNC13C	0.632108
1_117543576	1	117543576	-	ENSSSCG00000004614	UNC13C	0.632108
1_117543644	1	117543644	-	ENSSSCG00000004614	UNC13C	0.632108
1_117545135	1	117545135	-	ENSSSCG00000004614	UNC13C	0.632108
1_117546795	1	117546795	-	ENSSSCG00000004614	UNC13C	0.647925
1_121483451	1	121483451	+	ENSSSCG00000004645	GABPB1	0.64443
1_121486021	1	121486021	+	ENSSSCG00000004645	GABPB1	0.676732
1_121552582	1	121552582	-	ENSSSCG00000004643	SLC27A2	0.821676
1_122214110	1	122214110	+	ENSSSCG00000004648	FAM227B	0.722884
1_122214261	1	122214261	+	ENSSSCG00000004648	FAM227B	0.6127
1_122214262	1	122214262	+	ENSSSCG00000004648	FAM227B	0.6127
1_122215645	1	122215645	+	ENSSSCG00000004648	FAM227B	0.722884
1_122215747	1	122215747	+	ENSSSCG00000004648	FAM227B	0.722884
1_122274887	1	122274887	+	ENSSSCG00000004648	FAM227B	0.810231
1_122274887	1	122274887	-	ENSSSCG00000004651	GALK2	0.810231
1_122275243	1	122275243	+	ENSSSCG00000004648	FAM227B	0.812334
1_122275243	1	122275243	-	ENSSSCG00000004651	GALK2	0.812334
1_126308958	1	126308958	-	ENSSSCG00000004670	C15orf48	0.725518
1_130906651	1	130906651	-	ENSSSCG00000004774	IVD	0.715931
1_130906660	1	130906660	-	ENSSSCG00000004774	IVD	0.715931
1_138883231	1	138883231	-	ENSSSCG00000038452	ADAMTS17	0.618062
1_138883623	1	138883623	-	ENSSSCG00000038452	ADAMTS17	0.615276
1_138883771	1	138883771	-	ENSSSCG00000038452	ADAMTS17	0.607285
1_138884479	1	138884479	-	ENSSSCG00000038452	ADAMTS17	0.623639
1_138884528	1	138884528	-	ENSSSCG00000038452	ADAMTS17	0.620854
1_138884618	1	138884618	-	ENSSSCG00000038452	ADAMTS17	0.612518
1_138884753	1	138884753	-	ENSSSCG00000038452	ADAMTS17	0.615287
1_138884829	1	138884829	-	ENSSSCG00000038452	ADAMTS17	0.623628
1_138884855	1	138884855	-	ENSSSCG00000038452	ADAMTS17	0.615287
1_138884868	1	138884868	-	ENSSSCG00000038452	ADAMTS17	0.612507
1_138885316	1	138885316	-	ENSSSCG00000038452	ADAMTS17	0.618062
1_138885730	1	138885730	-	ENSSSCG00000038452	ADAMTS17	0.612507
1_140684025	1	140684025	+	ENSSSCG00000038547	GABRB3	0.834926
1_143261370	1	143261370	+	ENSSSCG00000004840	OTUD7A	0.765269
1_143261444	1	143261444	+	ENSSSCG00000004840	OTUD7A	0.766405
1_143261624	1	143261624	+	ENSSSCG00000004840	OTUD7A	0.763259
1_143261790	1	143261790	+	ENSSSCG00000004840	OTUD7A	0.767289
1_143261951	1	143261951	+	ENSSSCG00000004840	OTUD7A	0.757201
1_143262029	1	143262029	+	ENSSSCG00000004840	OTUD7A	0.759216
1_143262482	1	143262482	+	ENSSSCG00000004840	OTUD7A	0.769319
1_143263128	1	143263128	+	ENSSSCG00000004840	OTUD7A	0.759207
1_143355309	1	143355309	+	ENSSSCG00000004840	OTUD7A	0.695712
1_149200613	1	149200613	-	ENSSSCG00000033971	ZNF407	0.676715
1_152728169	1	152728169	+	ENSSSCG00000032574	RTTN	0.796192
1_162228371	1	162228371	+	ENSSSCG00000004918	ALPK2	0.708898
1_163159102	1	163159102	-	ENSSSCG00000004926	PDCD7	0.617066
1_163162888	1	163162888	-	ENSSSCG00000004926	PDCD7	0.617066
1_163163897	1	163163897	-	ENSSSCG00000004926	PDCD7	0.622284
1_163176617	1	163176617	-	ENSSSCG00000004927	CLPX	0.614458
1_163186029	1	163186029	-	ENSSSCG00000004927	CLPX	0.619678
1_163186980	1	163186980	-	ENSSSCG00000004927	CLPX	0.619678
1_163189796	1	163189796	-	ENSSSCG00000004927	CLPX	0.622295
1_163190153	1	163190153	-	ENSSSCG00000004927	CLPX	0.617066
1_163193647	1	163193647	-	ENSSSCG00000004927	CLPX	0.619678
1_163193649	1	163193649	-	ENSSSCG00000004927	CLPX	0.619678
1_163197117	1	163197117	-	ENSSSCG00000004927	CLPX	0.609326
1_163554521	1	163554521	+	ENSSSCG00000004935	HACD3	0.77367
1_163555298	1	163555298	+	ENSSSCG00000004935	HACD3	0.778241
1_163555385	1	163555385	+	ENSSSCG00000004935	HACD3	0.776264
1_163563027	1	163563027	+	ENSSSCG00000004935	HACD3	0.778241
1_169902127	1	169902127	-	ENSSSCG00000004989	FBXO33	0.666263
1_169905920	1	169905920	-	ENSSSCG00000004989	FBXO33	0.663953
1_169911587	1	169911587	-	ENSSSCG00000004989	FBXO33	0.661069
1_177144793	1	177144793	-	ENSSSCG00000005002	MDGA2	0.816255
1_180934106	1	180934106	+	ENSSSCG00000038422	TMX1	0.793591
1_182224202	1	182224202	+	ENSSSCG00000005036	GPR137C	0.7684
1_183486649	1	183486649	-	ENSSSCG00000005045	BMP4	0.975065
1_183493998	1	183493998	-	ENSSSCG00000005045	BMP4	0.707926
1_183669840	1	183669840	-	ENSSSCG00000005045	BMP4	0.683266
1_183673994	1	183673994	-	ENSSSCG00000005045	BMP4	0.687046
1_184131132	1	184131132	+	ENSSSCG00000023408	SAMD4A	0.679814
1_184135357	1	184135357	+	ENSSSCG00000023408	SAMD4A	0.681968
1_184704587	1	184704587	-	ENSSSCG00000005058	ATG14	0.789809
1_185436305	1	185436305	+	ENSSSCG00000033800	PELI2	0.641699
1_186877755	1	186877755	-	ENSSSCG00000005068	SLC35F4	0.917273
1_186896170	1	186896170	-	ENSSSCG00000005068	SLC35F4	0.610486
1_187480004	1	187480004	+	ENSSSCG00000005075	TOMM20L	0.876428
1_187480004	1	187480004	+	ENSSSCG00000005076	KIAA0586	0.876428
1_190959024	1	190959024	+	ENSSSCG00000005098	SYT16	0.881539
1_190965911	1	190965911	+	ENSSSCG00000005098	SYT16	0.913078
1_191774053	1	191774053	+	ENSSSCG00000005106	NTRK3	0.803563
1_191814380	1	191814380	+	ENSSSCG00000005106	NTRK3	0.869849
1_194246826	1	194246826	-	ENSSSCG00000005110	SYNE2	0.777472
1_195083494	1	195083494	+	ENSSSCG00000034726	KCNH5	0.655112
1_195132152	1	195132152	+	ENSSSCG00000034726	KCNH5	0.729692
1_195132398	1	195132398	+	ENSSSCG00000034726	KCNH5	0.811462
1_195133473	1	195133473	+	ENSSSCG00000034726	KCNH5	0.737394
1_195133691	1	195133691	+	ENSSSCG00000034726	KCNH5	0.744548
1_195133945	1	195133945	+	ENSSSCG00000034726	KCNH5	0.75537
1_195134823	1	195134823	+	ENSSSCG00000034726	KCNH5	0.658022
1_195134850	1	195134850	+	ENSSSCG00000034726	KCNH5	0.667228
1_195962437	1	195962437	-	ENSSSCG00000005122	TEK	0.655322
1_195963501	1	195963501	-	ENSSSCG00000005122	TEK	0.655322
1_195965921	1	195965921	-	ENSSSCG00000005122	TEK	0.642448
1_195967590	1	195967590	-	ENSSSCG00000005122	TEK	0.639461
1_195968164	1	195968164	-	ENSSSCG00000005122	TEK	0.695242
1_203229320	1	203229320	+	ENSSSCG00000005167	SLC24A2	0.788577
1_216432260	1	216432260	-	ENSSSCG00000005208	RIC1	0.656407
1_217176272	1	217176272	-	ENSSSCG00000005217	RCL1	0.719381
1_217874523	1	217874523	+	ENSSSCG00000005224	GLIS3	0.666954
1_217874552	1	217874552	+	ENSSSCG00000005224	GLIS3	0.668917
1_217875734	1	217875734	+	ENSSSCG00000005224	GLIS3	0.672817
1_217877015	1	217877015	+	ENSSSCG00000005224	GLIS3	0.676781
1_219003396	1	219003396	+	ENSSSCG00000005227	PUM3	0.673218
1_219025158	1	219025158	+	ENSSSCG00000005227	PUM3	0.704212
1_219037575	1	219037575	+	ENSSSCG00000005227	PUM3	0.704212
1_219175552	1	219175552	-	ENSSSCG00000005229	VLDLR	0.681332
1_219184406	1	219184406	-	ENSSSCG00000005229	VLDLR	0.68407
1_219615202	1	219615202	-	ENSSSCG00000005232	SMARCA2	0.681422
1_221758619	1	221758619	+	ENSSSCG00000005243	PGM5	0.77559
1_222315441	1	222315441	+	ENSSSCG00000027161	PIP5K1B	0.844625
1_223889065	1	223889065	-	ENSSSCG00000005257	TRPM3	0.87794
1_224084929	1	224084929	-	ENSSSCG00000005257	TRPM3	0.853848
1_224142770	1	224142770	-	ENSSSCG00000005257	TRPM3	0.657644
1_224143804	1	224143804	-	ENSSSCG00000005257	TRPM3	0.630874
1_225442994	1	225442994	+	ENSSSCG00000034919	GDA	0.611064
1_225535028	1	225535028	+	ENSSSCG00000034919	GDA	0.610689
1_225535030	1	225535030	+	ENSSSCG00000034919	GDA	0.610689
1_225589526	1	225589526	+	ENSSSCG00000034919	GDA	0.691784
1_225714647	1	225714647	+	ENSSSCG00000005266	TMC1	0.630343
1_225753860	1	225753860	+	ENSSSCG00000005266	TMC1	0.710987
1_225753926	1	225753926	+	ENSSSCG00000005266	TMC1	0.71314
1_225803290	1	225803290	+	ENSSSCG00000005266	TMC1	0.682835
1_225803347	1	225803347	+	ENSSSCG00000005266	TMC1	0.687291
1_225803641	1	225803641	+	ENSSSCG00000005266	TMC1	0.679504
1_225803758	1	225803758	+	ENSSSCG00000005266	TMC1	0.674526
1_225803766	1	225803766	+	ENSSSCG00000005266	TMC1	0.671978
1_225804322	1	225804322	+	ENSSSCG00000005266	TMC1	0.671978
1_225804620	1	225804620	+	ENSSSCG00000005266	TMC1	0.679634
1_225804925	1	225804925	+	ENSSSCG00000005266	TMC1	0.682183
1_225805029	1	225805029	+	ENSSSCG00000005266	TMC1	0.679624
1_225805110	1	225805110	+	ENSSSCG00000005266	TMC1	0.684735
1_225805112	1	225805112	+	ENSSSCG00000005266	TMC1	0.684735
1_225809444	1	225809444	+	ENSSSCG00000005266	TMC1	0.666911
1_225809563	1	225809563	+	ENSSSCG00000005266	TMC1	0.659609
1_225811065	1	225811065	+	ENSSSCG00000005266	TMC1	0.666901
1_225811474	1	225811474	+	ENSSSCG00000005266	TMC1	0.732586
1_227616032	1	227616032	+	ENSSSCG00000005268	RORB	0.614335
1_227765172	1	227765172	+	ENSSSCG00000005268	RORB	0.611637
1_227767954	1	227767954	+	ENSSSCG00000005268	RORB	0.614589
1_227923226	1	227923226	-	ENSSSCG00000005269	TRPM6	0.868766
1_227923236	1	227923236	-	ENSSSCG00000005269	TRPM6	0.839023
1_227923582	1	227923582	-	ENSSSCG00000005269	TRPM6	0.86646
1_227923940	1	227923940	-	ENSSSCG00000005269	TRPM6	0.866469
1_227926924	1	227926924	-	ENSSSCG00000005269	TRPM6	0.829915
1_231092284	1	231092284	+	ENSSSCG00000005286	CEP78	0.884911
1_231092307	1	231092307	+	ENSSSCG00000005286	CEP78	0.886903
1_231098737	1	231098737	+	ENSSSCG00000005286	CEP78	0.728086
1_231099401	1	231099401	+	ENSSSCG00000005286	CEP78	0.723235
1_231099940	1	231099940	+	ENSSSCG00000005286	CEP78	0.71416
1_231099981	1	231099981	+	ENSSSCG00000005286	CEP78	0.692821
1_231100074	1	231100074	+	ENSSSCG00000005286	CEP78	0.695408
1_231100259	1	231100259	+	ENSSSCG00000005286	CEP78	0.692811
1_231100347	1	231100347	+	ENSSSCG00000005286	CEP78	0.690227
1_231100459	1	231100459	+	ENSSSCG00000005286	CEP78	0.692811
1_231100477	1	231100477	+	ENSSSCG00000005286	CEP78	0.690227
1_231100978	1	231100978	+	ENSSSCG00000005286	CEP78	0.695408
1_231101034	1	231101034	+	ENSSSCG00000005286	CEP78	0.692821
1_231104690	1	231104690	+	ENSSSCG00000005286	CEP78	0.690227
1_231104726	1	231104726	+	ENSSSCG00000005286	CEP78	0.692821
1_231105124	1	231105124	+	ENSSSCG00000005286	CEP78	0.690227
1_231105580	1	231105580	+	ENSSSCG00000005286	CEP78	0.685051
1_231109118	1	231109118	+	ENSSSCG00000005286	CEP78	0.730675
1_232382826	1	232382826	+	ENSSSCG00000005288	TLE4	0.923367
1_235987340	1	235987340	+	ENSSSCG00000005305	UNC13B	0.619277
1_235991262	1	235991262	+	ENSSSCG00000005305	UNC13B	0.622006
1_235993812	1	235993812	+	ENSSSCG00000005305	UNC13B	0.616554
1_246185461	1	246185461	-	ENSSSCG00000005423	ABCA1	0.646883
1_256850140	1	256850140	-	ENSSSCG00000005502	ASTN2	0.666003
1_260580022	1	260580022	-	ENSSSCG00000028117	CDK5RAP2	0.760359
1_260853297	1	260853297	-	ENSSSCG00000005507	PSMD5	0.633064
1_260853426	1	260853426	-	ENSSSCG00000005507	PSMD5	0.626303
1_260853869	1	260853869	-	ENSSSCG00000005507	PSMD5	0.624362
1_260853876	1	260853876	-	ENSSSCG00000005507	PSMD5	0.624362
1_260854030	1	260854030	-	ENSSSCG00000005507	PSMD5	0.633864
1_260854108	1	260854108	-	ENSSSCG00000005507	PSMD5	0.633864
1_267947628	1	267947628	+	ENSSSCG00000005611	ZNF79	0.642744
1_269901883	1	269901883	+	ENSSSCG00000005680	PRRX2	0.707206
1_269902014	1	269902014	+	ENSSSCG00000005680	PRRX2	0.723958
1_270511850	1	270511850	+	ENSSSCG00000005699	HMCN2	0.816026
2_48631516	2	48631516	+	ENSSSCG00000013405	EIF4G2	0.638971
2_48874109	2	48874109	+	ENSSSCG00000020720	IRAG1	0.715932
2_50965299	2	50965299	+	ENSSSCG00000013984	SNAP47	0.646774
2_51338172	2	51338172	+	ENSSSCG00000034569	OBSCN	0.708426
2_57744997	2	57744997	-	ENSSSCG00000028567	BTNL9	0.726106
2_57854366	2	57854366	+	ENSSSCG00000014539	ZFP62	0.676932
2_57854761	2	57854761	+	ENSSSCG00000014539	ZFP62	0.612735
2_57854768	2	57854768	+	ENSSSCG00000014539	ZFP62	0.612735
2_57855965	2	57855965	+	ENSSSCG00000014539	ZFP62	0.670456
2_57856881	2	57856881	+	ENSSSCG00000014539	ZFP62	0.683757
2_57857396	2	57857396	+	ENSSSCG00000014539	ZFP62	0.621342
2_57862214	2	57862214	+	ENSSSCG00000014539	ZFP62	0.663333
2_57862530	2	57862530	+	ENSSSCG00000014539	ZFP62	0.670132
2_59819920	2	59819920	-	ENSSSCG00000013891	CCDC124	0.733798
2_59820506	2	59820506	-	ENSSSCG00000013891	CCDC124	0.731282
2_59822379	2	59822379	-	ENSSSCG00000013891	CCDC124	0.741355
2_60015960	2	60015960	-	ENSSSCG00000013885	FCHO1	0.656363
2_60015960	2	60015960	-	ENSSSCG00000013884	MAP1S	0.656363
2_61140695	2	61140695	+	ENSSSCG00000013857	EPS15L1	0.78579
2_61907127	2	61907127	-	ENSSSCG00000013842	CYP4F3	0.611594
2_61907127	2	61907127	-	ENSSSCG00000027013	CYP4F8	0.611594
2_61908464	2	61908464	-	ENSSSCG00000013842	CYP4F3	0.611594
2_61908464	2	61908464	-	ENSSSCG00000027013	CYP4F8	0.611594
2_61908610	2	61908610	-	ENSSSCG00000013842	CYP4F3	0.611607
2_61908610	2	61908610	-	ENSSSCG00000027013	CYP4F8	0.611607
2_61908983	2	61908983	-	ENSSSCG00000013842	CYP4F3	0.611607
2_61908983	2	61908983	-	ENSSSCG00000027013	CYP4F8	0.611607
2_61909196	2	61909196	-	ENSSSCG00000013842	CYP4F3	0.614792
2_61909196	2	61909196	-	ENSSSCG00000027013	CYP4F8	0.614792
2_61909524	2	61909524	-	ENSSSCG00000013842	CYP4F3	0.621189
2_61909524	2	61909524	-	ENSSSCG00000027013	CYP4F8	0.621189
2_61912105	2	61912105	-	ENSSSCG00000013842	CYP4F3	0.612481
2_61912105	2	61912105	-	ENSSSCG00000027013	CYP4F8	0.612481
2_61912870	2	61912870	-	ENSSSCG00000013842	CYP4F3	0.612468
2_61912870	2	61912870	-	ENSSSCG00000027013	CYP4F8	0.612468
2_61912915	2	61912915	-	ENSSSCG00000013842	CYP4F3	0.61478
2_61912915	2	61912915	-	ENSSSCG00000027013	CYP4F8	0.61478
2_61912916	2	61912916	-	ENSSSCG00000013842	CYP4F3	0.61478
2_61912916	2	61912916	-	ENSSSCG00000027013	CYP4F8	0.61478
2_61912923	2	61912923	-	ENSSSCG00000013842	CYP4F3	0.61478
2_61912923	2	61912923	-	ENSSSCG00000027013	CYP4F8	0.61478
2_61912927	2	61912927	-	ENSSSCG00000013842	CYP4F3	0.61478
2_61912927	2	61912927	-	ENSSSCG00000027013	CYP4F8	0.61478
2_61912931	2	61912931	-	ENSSSCG00000013842	CYP4F3	0.61478
2_61912931	2	61912931	-	ENSSSCG00000027013	CYP4F8	0.61478
2_61913067	2	61913067	-	ENSSSCG00000013842	CYP4F3	0.611594
2_61913067	2	61913067	-	ENSSSCG00000027013	CYP4F8	0.611594
2_62226248	2	62226248	+	ENSSSCG00000013837	AKAP8	0.673661
2_62228378	2	62228378	+	ENSSSCG00000013837	AKAP8	0.640718
2_62235410	2	62235410	+	ENSSSCG00000013837	AKAP8	0.676303
2_62302871	2	62302871	+	ENSSSCG00000022227	BRD4	0.781828
2_62302928	2	62302928	+	ENSSSCG00000022227	BRD4	0.816574
2_62304718	2	62304718	+	ENSSSCG00000022227	BRD4	0.819022
2_62305828	2	62305828	+	ENSSSCG00000022227	BRD4	0.819022
2_62307189	2	62307189	+	ENSSSCG00000022227	BRD4	0.819022
2_62307380	2	62307380	+	ENSSSCG00000022227	BRD4	0.819022
2_62307839	2	62307839	+	ENSSSCG00000022227	BRD4	0.816583
2_62311586	2	62311586	+	ENSSSCG00000022227	BRD4	0.819022
2_62439347	2	62439347	+	ENSSSCG00000013830	ILVBL	0.721788
2_62439503	2	62439503	+	ENSSSCG00000013830	ILVBL	0.746941
2_62443260	2	62443260	+	ENSSSCG00000013830	ILVBL	0.739833
2_62444459	2	62444459	+	ENSSSCG00000013830	ILVBL	0.7424
2_62444670	2	62444670	+	ENSSSCG00000013830	ILVBL	0.741609
2_62445110	2	62445110	+	ENSSSCG00000013830	ILVBL	0.756579
2_62447527	2	62447527	+	ENSSSCG00000013830	ILVBL	0.757445
2_62447527	2	62447527	-	ENSSSCG00000013829	SYDE1	0.757445
2_62449384	2	62449384	+	ENSSSCG00000013830	ILVBL	0.805452
2_62449384	2	62449384	-	ENSSSCG00000013829	SYDE1	0.805452
2_66032016	2	66032016	-	ENSSSCG00000013742	NFIX	0.634
2_66193632	2	66193632	+	ENSSSCG00000033304	RTBDN	0.770865
2_66193632	2	66193632	-	ENSSSCG00000013737	RNASEH2A	0.770865
2_66194131	2	66194131	-	ENSSSCG00000013737	RNASEH2A	0.747826
2_66195316	2	66195316	-	ENSSSCG00000013737	RNASEH2A	0.768002
2_66198388	2	66198388	-	ENSSSCG00000013737	RNASEH2A	0.747826
2_69253912	2	69253912	+	ENSSSCG00000013642	PDE4A	0.809301
2_69484451	2	69484451	+	ENSSSCG00000013630	DNM2	0.758702
2_69490816	2	69490816	+	ENSSSCG00000013630	DNM2	0.765713
2_69507478	2	69507478	+	ENSSSCG00000013630	DNM2	0.717035
2_69620244	2	69620244	+	ENSSSCG00000013633	CARM1	0.616725
2_69626718	2	69626718	+	ENSSSCG00000013633	CARM1	0.616735
2_69628017	2	69628017	+	ENSSSCG00000013633	CARM1	0.616735
2_70888625	2	70888625	-	ENSSSCG00000013600	RAB11B	0.656093
2_70890332	2	70890332	-	ENSSSCG00000013600	RAB11B	0.66474
2_70890364	2	70890364	-	ENSSSCG00000013600	RAB11B	0.66474
2_70891153	2	70891153	-	ENSSSCG00000013600	RAB11B	0.662568
2_70942383	2	70942383	+	ENSSSCG00000013598	KANK3	0.734925
2_70942429	2	70942429	+	ENSSSCG00000013598	KANK3	0.728258
2_70942436	2	70942436	+	ENSSSCG00000013598	KANK3	0.728258
2_72995197	2	72995197	+	ENSSSCG00000035403	RFX2	0.92051
2_73220787	2	73220787	-	ENSSSCG00000013527	CATSPERD	0.783198
2_73232188	2	73232188	-	ENSSSCG00000013527	CATSPERD	0.880524
2_73232204	2	73232204	-	ENSSSCG00000013527	CATSPERD	0.882628
2_73232214	2	73232214	-	ENSSSCG00000013527	CATSPERD	0.884733
2_73238120	2	73238120	-	ENSSSCG00000013527	CATSPERD	0.640655
2_73238789	2	73238789	-	ENSSSCG00000013527	CATSPERD	0.609737
2_73238805	2	73238805	-	ENSSSCG00000013527	CATSPERD	0.636244
2_73239321	2	73239321	-	ENSSSCG00000013527	CATSPERD	0.64169
2_73239519	2	73239519	-	ENSSSCG00000013527	CATSPERD	0.647233
2_73240225	2	73240225	-	ENSSSCG00000013527	CATSPERD	0.606194
2_73288992	2	73288992	-	ENSSSCG00000030546	HSD11B1L	0.900186
2_73289151	2	73289151	-	ENSSSCG00000030546	HSD11B1L	0.940142
2_73292326	2	73292326	-	ENSSSCG00000030546	HSD11B1L	0.61462
2_73292976	2	73292976	-	ENSSSCG00000030546	HSD11B1L	0.669191
2_73293638	2	73293638	-	ENSSSCG00000030546	HSD11B1L	0.677833
2_73293659	2	73293659	-	ENSSSCG00000030546	HSD11B1L	0.715867
2_73293661	2	73293661	-	ENSSSCG00000030546	HSD11B1L	0.715867
2_73293921	2	73293921	-	ENSSSCG00000030546	HSD11B1L	0.675672
2_73301957	2	73301957	-	ENSSSCG00000013522	SAFB	0.669191
2_73302978	2	73302978	-	ENSSSCG00000013522	SAFB	0.662707
2_73304089	2	73304089	-	ENSSSCG00000013522	SAFB	0.686401
2_73305112	2	73305112	-	ENSSSCG00000013522	SAFB	0.656195
2_73306070	2	73306070	-	ENSSSCG00000013522	SAFB	0.690705
2_73307688	2	73307688	-	ENSSSCG00000013522	SAFB	0.682102
2_73308069	2	73308069	-	ENSSSCG00000013522	SAFB	0.871866
2_73308536	2	73308536	-	ENSSSCG00000013522	SAFB	0.684258
2_73310345	2	73310345	-	ENSSSCG00000013522	SAFB	0.677809
2_73313362	2	73313362	-	ENSSSCG00000013522	SAFB	0.679968
2_73314632	2	73314632	-	ENSSSCG00000013522	SAFB	0.625608
2_73317491	2	73317491	-	ENSSSCG00000013522	SAFB	0.625608
2_73322746	2	73322746	-	ENSSSCG00000013522	SAFB	0.774235
2_73323146	2	73323146	-	ENSSSCG00000013522	SAFB	0.774997
2_73323147	2	73323147	-	ENSSSCG00000013522	SAFB	0.774997
2_73324120	2	73324120	-	ENSSSCG00000013522	SAFB	0.878261
2_73324831	2	73324831	-	ENSSSCG00000013522	SAFB	0.625608
2_73325520	2	73325520	-	ENSSSCG00000013522	SAFB	0.871874
2_73325978	2	73325978	-	ENSSSCG00000013522	SAFB	0.632192
2_73326860	2	73326860	-	ENSSSCG00000013522	SAFB	0.629981
2_73328051	2	73328051	-	ENSSSCG00000013522	SAFB	0.878223
2_73328374	2	73328374	-	ENSSSCG00000013522	SAFB	0.679415
2_73331103	2	73331103	-	ENSSSCG00000013522	SAFB	0.874007
2_73332068	2	73332068	-	ENSSSCG00000013522	SAFB	0.876125
2_73336881	2	73336881	+	ENSSSCG00000013523	SAFB2	0.7121
2_73339761	2	73339761	+	ENSSSCG00000013523	SAFB2	0.660546
2_73350259	2	73350259	+	ENSSSCG00000013523	SAFB2	0.785837
2_78696755	2	78696755	+	ENSSSCG00000014014	TBC1D9B	0.636007
2_80062232	2	80062232	+	ENSSSCG00000014029	COL23A1	0.681118
2_84392897	2	84392897	+	ENSSSCG00000014080	HMGCR	0.671147
2_140185741	2	140185741	-	ENSSSCG00000014327	BRD8	0.751289
2_144739064	2	144739064	+	ENSSSCG00000014399	ARHGAP26	0.620326
3_392272	3	392272	-	ENSSSCG00000007542	PRKAR1B	0.747544
3_3233509	3	3233509	+	ENSSSCG00000007574	SDK1	0.810515
3_12014941	3	12014941	-	ENSSSCG00000024045	CASTOR2	0.694063
3_12014959	3	12014959	-	ENSSSCG00000024045	CASTOR2	0.689899
3_52581020	3	52581020	-	ENSSSCG00000008164	MAP4K4	0.678979
3_53346374	3	53346374	-	ENSSSCG00000008171	NPAS2	0.636641
3_54624257	3	54624257	+	ENSSSCG00000008179	REV1	0.752445
3_56052797	3	56052797	-	ENSSSCG00000033394	VWA3B	0.647641
3_56530168	3	56530168	-	ENSSSCG00000008193	ZAP70	0.66606
3_71713627	3	71713627	+	ENSSSCG00000008321	FIGLA	0.912144
3_92723609	3	92723609	+	ENSSSCG00000029485	FBXO11	0.938125
3_94519342	3	94519342	-	ENSSSCG00000008444	PRKCE	0.697742
3_103385023	3	103385023	-	ENSSSCG00000008501	VIT	0.633919
3_103385049	3	103385049	-	ENSSSCG00000008501	VIT	0.636092
3_103385080	3	103385080	-	ENSSSCG00000008501	VIT	0.642115
3_103385258	3	103385258	-	ENSSSCG00000008501	VIT	0.646432
3_111840581	3	111840581	-	ENSSSCG00000039557	TRIM54	0.744017
3_122188944	3	122188944	+	ENSSSCG00000008621	NBAS	0.616623
4_19327319	4	19327319	+	ENSSSCG00000006001	ENPP2	0.782771
4_19349353	4	19349353	+	ENSSSCG00000006001	ENPP2	0.753166
4_45619330	4	45619330	-	ENSSSCG00000006116	SLC26A7	0.628009
4_45619330	4	45619330	-	ENSSSCG00000039660	LRRC69	0.628009
4_46079320	4	46079320	+	ENSSSCG00000040562	C8orf88	0.6076
4_46079320	4	46079320	-	ENSSSCG00000031424	NECAB1	0.6076
4_48821742	4	48821742	+	ENSSSCG00000006132	MMP16	0.77436
4_56160306	4	56160306	-	ENSSSCG00000006155	ZBTB10	0.673485
4_62392096	4	62392096	+	ENSSSCG00000006179	STAU2	0.739134
4_106002451	4	106002451	+	ENSSSCG00000006755	DENND2C	0.605784
4_106002452	4	106002452	+	ENSSSCG00000006755	DENND2C	0.605784
4_107614930	4	107614930	+	ENSSSCG00000006771	SLC16A1	0.727725
4_107708338	4	107708338	-	ENSSSCG00000042304	TAFA3	0.625779
4_107708490	4	107708490	-	ENSSSCG00000042304	TAFA3	0.629471
4_107746068	4	107746068	-	ENSSSCG00000006776	MOV10	0.810647
4_107746124	4	107746124	-	ENSSSCG00000006776	MOV10	0.808674
4_107747378	4	107747378	-	ENSSSCG00000006776	MOV10	0.812612
4_107747385	4	107747385	-	ENSSSCG00000006776	MOV10	0.812612
4_107884087	4	107884087	+	ENSSSCG00000006779	ST7L	0.723246
4_111583335	4	111583335	+	ENSSSCG00000006848	SLC25A24	0.622152
4_116460049	4	116460049	+	ENSSSCG00000006858	OLFM3	0.632222
4_119180449	4	119180449	-	ENSSSCG00000006877	SNX7	0.699442
5_26444563	5	26444563	-	ENSSSCG00000034686	TAFA2	0.677466
5_26444621	5	26444621	-	ENSSSCG00000034686	TAFA2	0.675467
5_28674905	5	28674905	-	ENSSSCG00000039258	C12orf66	0.619946
5_33897913	5	33897913	+	ENSSSCG00000000496	CCT2	0.69355
5_46984420	5	46984420	+	ENSSSCG00000000555	ITPR2	0.756809
5_62014471	5	62014471	+	ENSSSCG00000000656	CLEC2B	0.683139
5_76690786	5	76690786	+	ENSSSCG00000030685	ARID2	0.606987
5_76690787	5	76690787	+	ENSSSCG00000030685	ARID2	0.606987
5_76692452	5	76692452	+	ENSSSCG00000030685	ARID2	0.606997
5_76696596	5	76696596	+	ENSSSCG00000030685	ARID2	0.616892
5_76698394	5	76698394	+	ENSSSCG00000030685	ARID2	0.612644
5_77680424	5	77680424	+	ENSSSCG00000000811	PCED1B	0.792164
5_77680830	5	77680830	+	ENSSSCG00000000811	PCED1B	0.776803
5_77680848	5	77680848	+	ENSSSCG00000000811	PCED1B	0.778993
5_77680859	5	77680859	+	ENSSSCG00000000811	PCED1B	0.781183
5_78358047	5	78358047	-	ENSSSCG00000025523	COL2A1	0.6158
5_78503938	5	78503938	+	ENSSSCG00000021129	PFKM	0.623698
5_81259001	5	81259001	+	ENSSSCG00000000856	PAH	0.669821
5_81259056	5	81259056	+	ENSSSCG00000000856	PAH	0.671948
5_81259076	5	81259076	+	ENSSSCG00000000856	PAH	0.669801
5_81259094	5	81259094	+	ENSSSCG00000000856	PAH	0.667686
5_81306048	5	81306048	+	ENSSSCG00000000856	PAH	0.745686
5_81397182	5	81397182	+	ENSSSCG00000000856	PAH	0.686831
5_81397200	5	81397200	+	ENSSSCG00000000856	PAH	0.689113
5_81397290	5	81397290	+	ENSSSCG00000000856	PAH	0.698256
5_81889992	5	81889992	-	ENSSSCG00000000859	PARPBP	0.944982
5_81900629	5	81900629	-	ENSSSCG00000000859	PARPBP	0.663764
5_81906949	5	81906949	-	ENSSSCG00000000859	PARPBP	0.660678
5_82561787	5	82561787	-	ENSSSCG00000000866	MYBPC1	0.705349
5_82561900	5	82561900	-	ENSSSCG00000000866	MYBPC1	0.703049
5_82562209	5	82562209	-	ENSSSCG00000000866	MYBPC1	0.712232
5_82562627	5	82562627	-	ENSSSCG00000000866	MYBPC1	0.703059
5_82563705	5	82563705	-	ENSSSCG00000000866	MYBPC1	0.712241
5_82564229	5	82564229	-	ENSSSCG00000000866	MYBPC1	0.705358
5_82565426	5	82565426	-	ENSSSCG00000000866	MYBPC1	0.712251
5_82565828	5	82565828	-	ENSSSCG00000000866	MYBPC1	0.71455
5_82567999	5	82567999	-	ENSSSCG00000000866	MYBPC1	0.716851
5_82568154	5	82568154	-	ENSSSCG00000000866	MYBPC1	0.716851
5_82568235	5	82568235	-	ENSSSCG00000000866	MYBPC1	0.716851
5_82568672	5	82568672	-	ENSSSCG00000000866	MYBPC1	0.709748
5_82569077	5	82569077	-	ENSSSCG00000000866	MYBPC1	0.70765
5_82569301	5	82569301	-	ENSSSCG00000000866	MYBPC1	0.709748
5_82569847	5	82569847	-	ENSSSCG00000000866	MYBPC1	0.716671
5_82570290	5	82570290	-	ENSSSCG00000000866	MYBPC1	0.709748
5_82570362	5	82570362	-	ENSSSCG00000000866	MYBPC1	0.702609
5_82570495	5	82570495	-	ENSSSCG00000000866	MYBPC1	0.714371
5_82570502	5	82570502	-	ENSSSCG00000000866	MYBPC1	0.712054
5_82570808	5	82570808	-	ENSSSCG00000000866	MYBPC1	0.716832
5_82570865	5	82570865	-	ENSSSCG00000000866	MYBPC1	0.714352
5_82570942	5	82570942	-	ENSSSCG00000000866	MYBPC1	0.712241
5_82571434	5	82571434	-	ENSSSCG00000000866	MYBPC1	0.707445
5_85322931	5	85322931	-	ENSSSCG00000038487	TMPO	0.671276
6_4483149	6	4483149	+	ENSSSCG00000002681	HSDL1	0.63858
6_4483219	6	4483219	+	ENSSSCG00000002681	HSDL1	0.642484
6_4483474	6	4483474	+	ENSSSCG00000002681	HSDL1	0.615142
6_6971523	6	6971523	-	ENSSSCG00000002690	GAN	0.637917
6_31192590	6	31192590	-	ENSSSCG00000035949	FTO	0.671881
6_31210185	6	31210185	-	ENSSSCG00000035949	FTO	0.653277
6_31210641	6	31210641	-	ENSSSCG00000035949	FTO	0.65595
6_31210766	6	31210766	-	ENSSSCG00000035949	FTO	0.653266
6_31210776	6	31210776	-	ENSSSCG00000035949	FTO	0.653266
6_31210827	6	31210827	-	ENSSSCG00000035949	FTO	0.658573
6_31210829	6	31210829	-	ENSSSCG00000035949	FTO	0.658573
6_31210972	6	31210972	-	ENSSSCG00000035949	FTO	0.655939
6_31210986	6	31210986	-	ENSSSCG00000035949	FTO	0.658584
6_31211396	6	31211396	-	ENSSSCG00000035949	FTO	0.658573
6_31211455	6	31211455	-	ENSSSCG00000035949	FTO	0.65063
6_31211923	6	31211923	-	ENSSSCG00000035949	FTO	0.655702
6_31212116	6	31212116	-	ENSSSCG00000035949	FTO	0.663896
6_31212425	6	31212425	-	ENSSSCG00000035949	FTO	0.661233
6_47332180	6	47332180	-	ENSSSCG00000002960	RASGRP4	0.62422
6_48645494	6	48645494	+	ENSSSCG00000025109	PLD3	0.620911
6_48654980	6	48654980	+	ENSSSCG00000025109	PLD3	0.640512
6_49659685	6	49659685	-	ENSSSCG00000003030	CIC	0.621566
6_49961500	6	49961500	-	ENSSSCG00000003043	DMRTC2	0.651433
6_52628851	6	52628851	+	ENSSSCG00000003103	FKRP	0.712342
6_52733393	6	52733393	+	ENSSSCG00000003107	ARHGAP35	0.641706
6_53205512	6	53205512	-	ENSSSCG00000029567	SLC8A2	0.605819
6_53776116	6	53776116	-	ENSSSCG00000030544	TMEM143	0.607061
6_54018783	6	54018783	-	ENSSSCG00000003146	NTN5	0.679726
6_72277678	6	72277678	+	ENSSSCG00000003438	VPS13D	0.674822
6_72279681	6	72279681	+	ENSSSCG00000003438	VPS13D	0.67183
6_72283486	6	72283486	+	ENSSSCG00000003438	VPS13D	0.659137
6_72283567	6	72283567	+	ENSSSCG00000003438	VPS13D	0.609899
6_72497422	6	72497422	+	ENSSSCG00000003438	VPS13D	0.699078
6_72500247	6	72500247	+	ENSSSCG00000003438	VPS13D	0.701452
6_72501808	6	72501808	+	ENSSSCG00000003438	VPS13D	0.708592
6_72504809	6	72504809	+	ENSSSCG00000003438	VPS13D	0.691497
6_72506334	6	72506334	+	ENSSSCG00000003438	VPS13D	0.699078
6_72506813	6	72506813	+	ENSSSCG00000003438	VPS13D	0.710986
6_72508077	6	72508077	+	ENSSSCG00000003438	VPS13D	0.706209
6_72509486	6	72509486	+	ENSSSCG00000003438	VPS13D	0.696706
6_73597966	6	73597966	+	ENSSSCG00000037676	KAZN	0.624138
6_73878376	6	73878376	+	ENSSSCG00000037676	KAZN	0.775492
6_77796855	6	77796855	-	ENSSSCG00000003493	CAPZB	0.820394
6_85430005	6	85430005	+	ENSSSCG00000028973	PHACTR4	0.761544
6_85430665	6	85430665	+	ENSSSCG00000028973	PHACTR4	0.761692
6_85430670	6	85430670	+	ENSSSCG00000028973	PHACTR4	0.773677
6_85430696	6	85430696	+	ENSSSCG00000028973	PHACTR4	0.763957
6_85432446	6	85432446	+	ENSSSCG00000028973	PHACTR4	0.771421
6_95275331	6	95275331	+	ENSSSCG00000003654	MACF1	0.661247
6_95397864	6	95397864	-	ENSSSCG00000003660	PABPC4	0.656966
6_95821607	6	95821607	+	ENSSSCG00000003672	CAP1	0.73703
6_95828695	6	95828695	+	ENSSSCG00000003672	CAP1	0.716372
6_97370915	6	97370915	-	ENSSSCG00000022163	GNAL	0.6684
6_97371057	6	97371057	-	ENSSSCG00000022163	GNAL	0.705994
6_108144616	6	108144616	+	ENSSSCG00000003705	CABLES1	0.703269
6_111126405	6	111126405	-	ENSSSCG00000003719	KCTD1	0.688458
6_118058538	6	118058538	-	ENSSSCG00000003737	NOL4	0.708031
6_118535833	6	118535833	+	ENSSSCG00000028047	DTNA	0.716525
6_120168448	6	120168448	+	ENSSSCG00000027935	FHOD3	0.867614
6_142067795	6	142067795	+	ENSSSCG00000003788	PTGER3	0.633962
6_142067818	6	142067818	+	ENSSSCG00000003788	PTGER3	0.632041
6_148463594	6	148463594	-	ENSSSCG00000003811	ROR1	0.662543
6_150874562	6	150874562	-	ENSSSCG00000023243	NFIA	0.639909
6_150874656	6	150874656	-	ENSSSCG00000023243	NFIA	0.638084
6_151133883	6	151133883	-	ENSSSCG00000023243	NFIA	0.71384
6_160906619	6	160906619	-	ENSSSCG00000031172	RNF11	0.711228
6_160906629	6	160906629	-	ENSSSCG00000031172	RNF11	0.711228
7_1762880	7	1762880	-	ENSSSCG00000038404	SERPINB6	0.627225
7_1763861	7	1763861	-	ENSSSCG00000038404	SERPINB6	0.663452
7_2804188	7	2804188	+	ENSSSCG00000000999	CDYL	0.698775
7_29607505	7	29607505	+	ENSSSCG00000001500	COL21A1	0.620705
7_31822024	7	31822024	+	ENSSSCG00000001556	MAPK14	0.784431
7_35268642	7	35268642	+	ENSSSCG00000001595	DAAM2	0.612657
7_37734850	7	37734850	+	ENSSSCG00000001641	UBR2	0.652407
7_40003757	7	40003757	-	ENSSSCG00000001709	SUPT3H	0.685016
7_42248609	7	42248609	+	ENSSSCG00000030197	CD2AP	0.615712
7_91364288	7	91364288	+	ENSSSCG00000002292	PLEKHH1	0.678224
7_91364288	7	91364288	+	ENSSSCG00000002294	ARG2	0.678224
7_99521784	7	99521784	+	ENSSSCG00000002388	ESRRB	0.656867
7_99523792	7	99523792	+	ENSSSCG00000002388	ESRRB	0.646773
7_111911271	7	111911271	+	ENSSSCG00000002432	KCNK13	0.757987
7_114999265	7	114999265	+	ENSSSCG00000038851	UNC79	0.673632
7_117566270	7	117566270	-	ENSSSCG00000002502	ATG2B	0.62946
7_117566878	7	117566878	-	ENSSSCG00000002502	ATG2B	0.621974
8_4288557	8	4288557	+	ENSSSCG00000008712	PPP2R2C	0.620915
8_4288560	8	4288560	+	ENSSSCG00000008712	PPP2R2C	0.622791
8_16138553	8	16138553	-	ENSSSCG00000023934	KCNIP4	0.649561
8_16138582	8	16138582	-	ENSSSCG00000023934	KCNIP4	0.651797
8_16138602	8	16138602	-	ENSSSCG00000023934	KCNIP4	0.651797
8_16205452	8	16205452	-	ENSSSCG00000023934	KCNIP4	0.640868
8_16205544	8	16205544	-	ENSSSCG00000023934	KCNIP4	0.647324
8_16291349	8	16291349	-	ENSSSCG00000023934	KCNIP4	0.635771
8_16897338	8	16897338	+	ENSSSCG00000008754	GBA3	0.625138
8_19204500	8	19204500	+	ENSSSCG00000027340	PI4K2B	0.608491
8_27803463	8	27803463	-	ENSSSCG00000008768	ARAP2	0.668886
8_27830509	8	27830509	-	ENSSSCG00000008768	ARAP2	0.686702
8_30297123	8	30297123	-	ENSSSCG00000023785	TMEM156	0.606072
8_30298364	8	30298364	-	ENSSSCG00000023785	TMEM156	0.614252
8_30301382	8	30301382	-	ENSSSCG00000023785	TMEM156	0.650789
8_30301805	8	30301805	-	ENSSSCG00000023785	TMEM156	0.650349
8_30301874	8	30301874	-	ENSSSCG00000023785	TMEM156	0.64475
8_30301892	8	30301892	-	ENSSSCG00000023785	TMEM156	0.647136
8_30302534	8	30302534	-	ENSSSCG00000023785	TMEM156	0.650349
8_30305655	8	30305655	-	ENSSSCG00000023785	TMEM156	0.634365
8_30305705	8	30305705	-	ENSSSCG00000023785	TMEM156	0.614692
8_30306455	8	30306455	-	ENSSSCG00000023785	TMEM156	0.620391
8_30309199	8	30309199	-	ENSSSCG00000023785	TMEM156	0.645154
8_30309390	8	30309390	-	ENSSSCG00000023785	TMEM156	0.650349
8_30310017	8	30310017	-	ENSSSCG00000023785	TMEM156	0.639159
8_30310607	8	30310607	-	ENSSSCG00000023785	TMEM156	0.639148
8_30310709	8	30310709	-	ENSSSCG00000023785	TMEM156	0.64475
8_30310734	8	30310734	-	ENSSSCG00000023785	TMEM156	0.65036
8_30310775	8	30310775	-	ENSSSCG00000023785	TMEM156	0.650349
8_30311159	8	30311159	-	ENSSSCG00000023785	TMEM156	0.64235
8_30311523	8	30311523	-	ENSSSCG00000023785	TMEM156	0.641946
8_30311624	8	30311624	-	ENSSSCG00000023785	TMEM156	0.647536
8_30311689	8	30311689	-	ENSSSCG00000023785	TMEM156	0.645176
8_30312654	8	30312654	-	ENSSSCG00000023785	TMEM156	0.606105
8_30312657	8	30312657	-	ENSSSCG00000023785	TMEM156	0.606105
8_30314448	8	30314448	-	ENSSSCG00000023785	TMEM156	0.648431
8_30315601	8	30315601	-	ENSSSCG00000023785	TMEM156	0.634354
8_30317388	8	30317388	-	ENSSSCG00000023785	TMEM156	0.647536
8_30319666	8	30319666	-	ENSSSCG00000023785	TMEM156	0.620379
8_30321124	8	30321124	-	ENSSSCG00000023785	TMEM156	0.62803
8_30322070	8	30322070	-	ENSSSCG00000023785	TMEM156	0.650349
8_30322865	8	30322865	-	ENSSSCG00000023785	TMEM156	0.617993
8_30323318	8	30323318	-	ENSSSCG00000023785	TMEM156	0.622798
8_30325396	8	30325396	-	ENSSSCG00000023785	TMEM156	0.627668
8_30326064	8	30326064	-	ENSSSCG00000023785	TMEM156	0.644738
8_30327744	8	30327744	-	ENSSSCG00000023785	TMEM156	0.639148
8_32070271	8	32070271	-	ENSSSCG00000022168	APBB2	0.705416
8_32070527	8	32070527	-	ENSSSCG00000022168	APBB2	0.826371
8_32070610	8	32070610	-	ENSSSCG00000022168	APBB2	0.840618
8_32070658	8	32070658	-	ENSSSCG00000022168	APBB2	0.840618
8_32070744	8	32070744	-	ENSSSCG00000022168	APBB2	0.826371
8_32070745	8	32070745	-	ENSSSCG00000022168	APBB2	0.826371
8_32071045	8	32071045	-	ENSSSCG00000022168	APBB2	0.691701
8_32071099	8	32071099	-	ENSSSCG00000022168	APBB2	0.687141
8_32071222	8	32071222	-	ENSSSCG00000022168	APBB2	0.673809
8_32071430	8	32071430	-	ENSSSCG00000022168	APBB2	0.693979
8_32071522	8	32071522	-	ENSSSCG00000022168	APBB2	0.826371
8_32071767	8	32071767	-	ENSSSCG00000022168	APBB2	0.840618
8_37356365	8	37356365	-	ENSSSCG00000033373	COMMD8	0.752121
8_37356836	8	37356836	-	ENSSSCG00000033373	COMMD8	0.752121
8_37357967	8	37357967	-	ENSSSCG00000033373	COMMD8	0.728703
8_37359117	8	37359117	-	ENSSSCG00000033373	COMMD8	0.728703
8_37361964	8	37361964	-	ENSSSCG00000033373	COMMD8	0.731613
8_37369374	8	37369374	-	ENSSSCG00000033373	COMMD8	0.728703
8_37373026	8	37373026	-	ENSSSCG00000033373	COMMD8	0.728703
8_37374184	8	37374184	-	ENSSSCG00000033373	COMMD8	0.734528
8_37374615	8	37374615	-	ENSSSCG00000033373	COMMD8	0.728703
8_37375062	8	37375062	-	ENSSSCG00000033373	COMMD8	0.723615
8_37376796	8	37376796	-	ENSSSCG00000033373	COMMD8	0.729447
8_37378164	8	37378164	-	ENSSSCG00000033373	COMMD8	0.728703
8_37378363	8	37378363	-	ENSSSCG00000033373	COMMD8	0.728703
8_37378525	8	37378525	-	ENSSSCG00000033373	COMMD8	0.734528
8_37378654	8	37378654	-	ENSSSCG00000033373	COMMD8	0.737448
8_37379282	8	37379282	-	ENSSSCG00000033373	COMMD8	0.725798
8_37379285	8	37379285	-	ENSSSCG00000033373	COMMD8	0.725798
8_37379299	8	37379299	-	ENSSSCG00000033373	COMMD8	0.728703
8_37379422	8	37379422	-	ENSSSCG00000033373	COMMD8	0.722898
8_37379499	8	37379499	-	ENSSSCG00000033373	COMMD8	0.728703
8_37379524	8	37379524	-	ENSSSCG00000033373	COMMD8	0.728703
8_37379533	8	37379533	-	ENSSSCG00000033373	COMMD8	0.728703
8_37425247	8	37425247	+	ENSSSCG00000008812	ATP10D	0.727969
8_37460308	8	37460308	+	ENSSSCG00000008812	ATP10D	0.740957
8_37466790	8	37466790	+	ENSSSCG00000008812	ATP10D	0.720814
8_37470696	8	37470696	+	ENSSSCG00000008812	ATP10D	0.726561
8_37470702	8	37470702	+	ENSSSCG00000008812	ATP10D	0.729431
8_37470703	8	37470703	+	ENSSSCG00000008812	ATP10D	0.726561
8_37479363	8	37479363	+	ENSSSCG00000008812	ATP10D	0.735184
8_37479414	8	37479414	+	ENSSSCG00000008812	ATP10D	0.735184
8_37490380	8	37490380	+	ENSSSCG00000008812	ATP10D	0.737342
8_37502237	8	37502237	+	ENSSSCG00000008812	ATP10D	0.612469
8_37754665	8	37754665	-	ENSSSCG00000008813	CORIN	0.677792
8_38170183	8	38170183	-	ENSSSCG00000008820	TEC	0.704254
8_38582428	8	38582428	-	ENSSSCG00000008826	FRYL	0.857038
8_38870970	8	38870970	+	ENSSSCG00000008830	CWH43	0.63702
8_40356658	8	40356658	-	ENSSSCG00000008838	LNX1	0.748581
8_40359323	8	40359323	-	ENSSSCG00000008838	LNX1	0.738487
8_40359675	8	40359675	-	ENSSSCG00000008838	LNX1	0.742537
8_40362964	8	40362964	-	ENSSSCG00000008838	LNX1	0.736496
8_41467616	8	41467616	+	ENSSSCG00000008842	KIT	0.783346
8_41819657	8	41819657	-	ENSSSCG00000008844	KDR	0.630279
8_41820072	8	41820072	-	ENSSSCG00000008844	KDR	0.63286
8_41821878	8	41821878	-	ENSSSCG00000008844	KDR	0.63099
8_41822035	8	41822035	-	ENSSSCG00000008844	KDR	0.616154
8_41824479	8	41824479	-	ENSSSCG00000008844	KDR	0.813675
8_41824878	8	41824878	-	ENSSSCG00000008844	KDR	0.811547
8_41825365	8	41825365	-	ENSSSCG00000008844	KDR	0.806599
8_41825808	8	41825808	-	ENSSSCG00000008844	KDR	0.813675
8_41825814	8	41825814	-	ENSSSCG00000008844	KDR	0.813675
8_41825919	8	41825919	-	ENSSSCG00000008844	KDR	0.922045
8_41826832	8	41826832	-	ENSSSCG00000008844	KDR	0.806599
8_41826924	8	41826924	-	ENSSSCG00000008844	KDR	0.813055
8_41827004	8	41827004	-	ENSSSCG00000008844	KDR	0.804433
8_41827018	8	41827018	-	ENSSSCG00000008844	KDR	0.813055
8_41827126	8	41827126	-	ENSSSCG00000008844	KDR	0.80875
8_41827131	8	41827131	-	ENSSSCG00000008844	KDR	0.80875
8_41827452	8	41827452	-	ENSSSCG00000008844	KDR	0.914112
8_41827458	8	41827458	-	ENSSSCG00000008844	KDR	0.914112
8_41836164	8	41836164	-	ENSSSCG00000008844	KDR	0.813055
8_41836277	8	41836277	-	ENSSSCG00000008844	KDR	0.80875
8_41837707	8	41837707	-	ENSSSCG00000008844	KDR	0.806599
8_41838217	8	41838217	-	ENSSSCG00000008844	KDR	0.804451
8_41838335	8	41838335	-	ENSSSCG00000008844	KDR	0.80875
8_41838817	8	41838817	-	ENSSSCG00000008844	KDR	0.806377
8_41839462	8	41839462	-	ENSSSCG00000008844	KDR	0.817934
8_41839720	8	41839720	-	ENSSSCG00000008844	KDR	0.817934
8_41839770	8	41839770	-	ENSSSCG00000008844	KDR	0.817934
8_41839841	8	41839841	-	ENSSSCG00000008844	KDR	0.821675
8_41839856	8	41839856	-	ENSSSCG00000008844	KDR	0.823845
8_41839922	8	41839922	-	ENSSSCG00000008844	KDR	0.820067
8_41843005	8	41843005	-	ENSSSCG00000008844	KDR	0.682349
8_41843032	8	41843032	-	ENSSSCG00000008844	KDR	0.686457
8_41843293	8	41843293	-	ENSSSCG00000008844	KDR	0.641499
8_41843382	8	41843382	-	ENSSSCG00000008844	KDR	0.645565
8_41844569	8	41844569	-	ENSSSCG00000008844	KDR	0.639474
8_41844823	8	41844823	-	ENSSSCG00000008844	KDR	0.639474
8_41844958	8	41844958	-	ENSSSCG00000008844	KDR	0.645555
8_41845588	8	41845588	-	ENSSSCG00000008844	KDR	0.647585
8_41846232	8	41846232	-	ENSSSCG00000008844	KDR	0.651641
8_41848945	8	41848945	-	ENSSSCG00000008844	KDR	0.641509
8_41849105	8	41849105	-	ENSSSCG00000008844	KDR	0.65166
8_41852605	8	41852605	-	ENSSSCG00000008844	KDR	0.907202
8_43767573	8	43767573	-	ENSSSCG00000008858	KLHL2	0.68209
8_43768642	8	43768642	-	ENSSSCG00000008858	KLHL2	0.682102
8_43769341	8	43769341	-	ENSSSCG00000008858	KLHL2	0.688542
8_43769636	8	43769636	-	ENSSSCG00000008858	KLHL2	0.690693
8_43771936	8	43771936	-	ENSSSCG00000008858	KLHL2	0.984688
8_46032388	8	46032388	+	ENSSSCG00000032722	GLRB	0.868403
8_47523005	8	47523005	+	ENSSSCG00000008875	RXFP1	0.816927
8_47524493	8	47524493	+	ENSSSCG00000008875	RXFP1	0.821103
8_47526565	8	47526565	+	ENSSSCG00000008875	RXFP1	0.816927
8_47527243	8	47527243	+	ENSSSCG00000008875	RXFP1	0.819111
8_47528816	8	47528816	+	ENSSSCG00000008875	RXFP1	0.819111
8_47592076	8	47592076	+	ENSSSCG00000008875	RXFP1	0.649929
8_47592547	8	47592547	+	ENSSSCG00000008875	RXFP1	0.663705
8_47592574	8	47592574	+	ENSSSCG00000008875	RXFP1	0.660631
8_47593157	8	47593157	+	ENSSSCG00000008875	RXFP1	0.649929
8_47864177	8	47864177	-	ENSSSCG00000037757	C4orf45	0.638919
8_47864567	8	47864567	-	ENSSSCG00000037757	C4orf45	0.64458
8_47864683	8	47864683	-	ENSSSCG00000037757	C4orf45	0.63766
8_50277187	8	50277187	-	ENSSSCG00000027183	FSTL5	0.629628
8_50277372	8	50277372	-	ENSSSCG00000027183	FSTL5	0.627131
8_50277547	8	50277547	-	ENSSSCG00000027183	FSTL5	0.621946
8_50277925	8	50277925	-	ENSSSCG00000027183	FSTL5	0.631811
8_50278531	8	50278531	-	ENSSSCG00000027183	FSTL5	0.60997
8_50406638	8	50406638	-	ENSSSCG00000027183	FSTL5	0.701574
8_50418254	8	50418254	-	ENSSSCG00000027183	FSTL5	0.73401
8_50497574	8	50497574	-	ENSSSCG00000027183	FSTL5	0.827228
8_50825153	8	50825153	-	ENSSSCG00000027183	FSTL5	0.62231
8_50846821	8	50846821	-	ENSSSCG00000027183	FSTL5	0.803647
8_50863401	8	50863401	-	ENSSSCG00000027183	FSTL5	0.723716
8_50903205	8	50903205	-	ENSSSCG00000027183	FSTL5	0.860492
8_50903490	8	50903490	-	ENSSSCG00000027183	FSTL5	0.870412
8_50903553	8	50903553	-	ENSSSCG00000027183	FSTL5	0.850569
8_52344008	8	52344008	+	ENSSSCG00000008890	TMA16	0.720702
8_52346123	8	52346123	+	ENSSSCG00000008890	TMA16	0.730358
8_52356432	8	52356432	+	ENSSSCG00000008890	TMA16	0.72783
8_52356439	8	52356439	+	ENSSSCG00000008890	TMA16	0.735066
8_52356548	8	52356548	+	ENSSSCG00000008890	TMA16	0.720692
8_52359141	8	52359141	+	ENSSSCG00000008890	TMA16	0.723053
8_52362931	8	52362931	+	ENSSSCG00000008890	TMA16	0.732711
8_52368309	8	52368309	+	ENSSSCG00000008890	TMA16	0.730198
8_52382283	8	52382283	-	ENSSSCG00000039175	MARCHF1	0.727937
8_52383843	8	52383843	-	ENSSSCG00000039175	MARCHF1	0.727781
8_52384608	8	52384608	-	ENSSSCG00000039175	MARCHF1	0.720657
8_52387385	8	52387385	-	ENSSSCG00000039175	MARCHF1	0.749778
8_52388402	8	52388402	-	ENSSSCG00000039175	MARCHF1	0.730287
8_52391557	8	52391557	-	ENSSSCG00000039175	MARCHF1	0.720863
8_52393497	8	52393497	-	ENSSSCG00000039175	MARCHF1	0.720771
8_52401971	8	52401971	-	ENSSSCG00000039175	MARCHF1	0.713802
8_52402499	8	52402499	-	ENSSSCG00000039175	MARCHF1	0.723063
8_52411929	8	52411929	-	ENSSSCG00000039175	MARCHF1	0.723216
8_52501676	8	52501676	-	ENSSSCG00000039175	MARCHF1	0.886794
8_52638880	8	52638880	-	ENSSSCG00000039175	MARCHF1	0.745097
8_52649599	8	52649599	-	ENSSSCG00000039175	MARCHF1	0.859585
8_52651590	8	52651590	-	ENSSSCG00000039175	MARCHF1	0.857634
8_52672550	8	52672550	-	ENSSSCG00000039175	MARCHF1	0.853702
8_53587541	8	53587541	+	ENSSSCG00000038890	SMIM31	0.711974
8_53607259	8	53607259	+	ENSSSCG00000038890	SMIM31	0.669012
8_53608872	8	53608872	+	ENSSSCG00000038890	SMIM31	0.680338
8_53608873	8	53608873	+	ENSSSCG00000038890	SMIM31	0.680338
8_53608890	8	53608890	+	ENSSSCG00000038890	SMIM31	0.680338
8_53621211	8	53621211	+	ENSSSCG00000038890	SMIM31	0.677504
8_56299366	8	56299366	-	ENSSSCG00000008913	IGFBP7	0.647669
8_56300146	8	56300146	-	ENSSSCG00000008913	IGFBP7	0.768573
8_56300273	8	56300273	-	ENSSSCG00000008913	IGFBP7	0.645505
8_56300951	8	56300951	-	ENSSSCG00000008913	IGFBP7	0.766332
8_56303800	8	56303800	-	ENSSSCG00000008913	IGFBP7	0.766323
8_56304346	8	56304346	-	ENSSSCG00000008913	IGFBP7	0.654155
8_56304549	8	56304549	-	ENSSSCG00000008913	IGFBP7	0.768583
8_56305377	8	56305377	-	ENSSSCG00000008913	IGFBP7	0.768583
8_56306598	8	56306598	-	ENSSSCG00000008913	IGFBP7	0.775365
8_56306629	8	56306629	-	ENSSSCG00000008913	IGFBP7	0.775375
8_56308969	8	56308969	-	ENSSSCG00000008913	IGFBP7	0.766323
8_67440418	8	67440418	-	ENSSSCG00000035379	JCHAIN	0.647884
8_72611776	8	72611776	+	ENSSSCG00000008986	SEPTIN11	0.756784
8_75698175	8	75698175	-	ENSSSCG00000009009	MND1	0.804255
8_75785330	8	75785330	-	ENSSSCG00000029200	TRIM2	0.746923
8_77468284	8	77468284	-	ENSSSCG00000020717	FAM160A1	0.675061
8_77484169	8	77484169	-	ENSSSCG00000020717	FAM160A1	0.675051
8_78490103	8	78490103	+	ENSSSCG00000009021	LRBA	0.623297
8_78490104	8	78490104	+	ENSSSCG00000009021	LRBA	0.623297
8_78490107	8	78490107	+	ENSSSCG00000009021	LRBA	0.623297
8_78540751	8	78540751	+	ENSSSCG00000009021	LRBA	0.716644
8_111761621	8	111761621	-	ENSSSCG00000009132	ENPEP	0.632993
8_111761621	8	111761621	+	ENSSSCG00000036236	ELOVL6	0.632993
8_113845203	8	113845203	+	ENSSSCG00000009148	LEF1	0.686528
8_119431253	8	119431253	+	ENSSSCG00000009172	PPP3CA	0.693437
8_119431305	8	119431305	+	ENSSSCG00000009172	PPP3CA	0.663869
8_119431494	8	119431494	+	ENSSSCG00000009172	PPP3CA	0.68454
8_119432331	8	119432331	+	ENSSSCG00000009172	PPP3CA	0.688984
8_119432354	8	119432354	+	ENSSSCG00000009172	PPP3CA	0.688984
8_119432409	8	119432409	+	ENSSSCG00000009172	PPP3CA	0.69121
8_119432626	8	119432626	+	ENSSSCG00000009172	PPP3CA	0.69121
8_119432659	8	119432659	+	ENSSSCG00000009172	PPP3CA	0.69121
8_128321777	8	128321777	-	ENSSSCG00000022986	CCSER1	0.760593
9_10131618	9	10131618	+	ENSSSCG00000028979	UVRAG	0.850971
9_10131632	9	10131632	+	ENSSSCG00000028979	UVRAG	0.857106
9_12635494	9	12635494	+	ENSSSCG00000014892	USP35	0.612715
9_12635533	9	12635533	+	ENSSSCG00000014892	USP35	0.606359
9_40791174	9	40791174	+	ENSSSCG00000015045	NCAM1	0.705157
9_40791357	9	40791357	+	ENSSSCG00000015045	NCAM1	0.716665
9_52471717	9	52471717	+	ENSSSCG00000015211	PKNOX2	0.734641
9_58508977	9	58508977	+	ENSSSCG00000015253	NTM	0.619582
9_58509095	9	58509095	+	ENSSSCG00000015253	NTM	0.613832
9_58693183	9	58693183	+	ENSSSCG00000015253	NTM	0.747711
9_58729875	9	58729875	+	ENSSSCG00000015253	NTM	0.673066
9_60092134	9	60092134	-	ENSSSCG00000037534	OPCML	0.606169
9_60092492	9	60092492	-	ENSSSCG00000037534	OPCML	0.616075
9_62493242	9	62493242	+	ENSSSCG00000024613	GUCY1A2	0.927434
9_64066928	9	64066928	-	ENSSSCG00000015270	FMOD	0.757012
9_64067080	9	64067080	-	ENSSSCG00000015270	FMOD	0.754753
9_64068434	9	64068434	-	ENSSSCG00000015270	FMOD	0.759281
9_64068470	9	64068470	-	ENSSSCG00000015270	FMOD	0.759291
9_64068491	9	64068491	-	ENSSSCG00000015270	FMOD	0.759291
9_64069115	9	64069115	-	ENSSSCG00000015270	FMOD	0.757021
9_64069155	9	64069155	-	ENSSSCG00000015270	FMOD	0.752469
9_64069421	9	64069421	-	ENSSSCG00000015270	FMOD	0.752478
9_64069442	9	64069442	-	ENSSSCG00000015270	FMOD	0.754744
9_64069494	9	64069494	-	ENSSSCG00000015270	FMOD	0.752478
9_64787684	9	64787684	+	ENSSSCG00000015277	SOX13	0.768065
9_64787684	9	64787684	-	ENSSSCG00000015276	ETNK2	0.768065
9_64787699	9	64787699	+	ENSSSCG00000015277	SOX13	0.770145
9_64787699	9	64787699	-	ENSSSCG00000015276	ETNK2	0.770145
9_64787712	9	64787712	+	ENSSSCG00000015277	SOX13	0.770145
9_64787712	9	64787712	-	ENSSSCG00000015276	ETNK2	0.770145
9_65074612	9	65074612	-	ENSSSCG00000015283	PIK3C2B	0.630037
9_65138151	9	65138151	-	ENSSSCG00000015283	PIK3C2B	0.650497
9_84354243	9	84354243	-	ENSSSCG00000015355	DGKB	0.641436
9_101141246	9	101141246	+	ENSSSCG00000031780	MAGI2	0.749128
9_101456453	9	101456453	+	ENSSSCG00000031780	MAGI2	0.759579
9_101456635	9	101456635	+	ENSSSCG00000031780	MAGI2	0.765147
9_101458022	9	101458022	+	ENSSSCG00000031780	MAGI2	0.721422
9_101458819	9	101458819	+	ENSSSCG00000031780	MAGI2	0.716181
9_101573362	9	101573362	+	ENSSSCG00000031780	MAGI2	0.680399
9_101573548	9	101573548	+	ENSSSCG00000031780	MAGI2	0.668229
9_101758610	9	101758610	+	ENSSSCG00000031780	MAGI2	0.636741
9_101758624	9	101758624	+	ENSSSCG00000031780	MAGI2	0.636752
9_101758794	9	101758794	+	ENSSSCG00000031780	MAGI2	0.639269
9_113168333	9	113168333	+	ENSSSCG00000015462	TPK1	0.608787
9_114496998	9	114496998	+	ENSSSCG00000038958	DNM3	0.80176
9_114532604	9	114532604	+	ENSSSCG00000038958	DNM3	0.864043
9_114533335	9	114533335	+	ENSSSCG00000038958	DNM3	0.646847
9_117648830	9	117648830	-	ENSSSCG00000015508	TNR	0.799736
9_118399140	9	118399140	+	ENSSSCG00000015512	PAPPA2	0.691381
9_125045002	9	125045002	+	ENSSSCG00000015563	RGL1	0.709087
9_130414550	9	130414550	-	ENSSSCG00000015586	RPS6KC1	0.644597
10_7725337	10	7725337	-	ENSSSCG00000027207	GPATCH2	0.712536
10_33629576	10	33629576	+	ENSSSCG00000011001	APTX	0.616091
10_33629576	10	33629576	+	ENSSSCG00000011003	NDUFB6	0.616091
10_45255537	10	45255537	+	ENSSSCG00000011042	RSU1	0.607535
10_45255629	10	45255629	+	ENSSSCG00000011042	RSU1	0.610317
10_45255760	10	45255760	+	ENSSSCG00000011042	RSU1	0.610674
10_45255769	10	45255769	+	ENSSSCG00000011042	RSU1	0.610674
10_45255849	10	45255849	+	ENSSSCG00000011042	RSU1	0.613105
10_45256261	10	45256261	+	ENSSSCG00000011042	RSU1	0.607513
10_45256341	10	45256341	+	ENSSSCG00000011042	RSU1	0.60822
10_45257240	10	45257240	+	ENSSSCG00000011042	RSU1	0.611025
10_45258493	10	45258493	+	ENSSSCG00000011042	RSU1	0.607881
10_45258847	10	45258847	+	ENSSSCG00000011042	RSU1	0.605787
10_49003810	10	49003810	+	ENSSSCG00000024127	ABI1	0.660949
10_50820047	10	50820047	-	ENSSSCG00000011075	KIAA1217	0.687155
10_52989291	10	52989291	+	ENSSSCG00000026001	DNAJC1	0.845519
10_56280625	10	56280625	-	ENSSSCG00000011102	NRP1	0.642852
10_56282915	10	56282915	-	ENSSSCG00000011102	NRP1	0.641038
10_56282996	10	56282996	-	ENSSSCG00000011102	NRP1	0.630182
10_56282998	10	56282998	-	ENSSSCG00000011102	NRP1	0.635601
10_56419226	10	56419226	-	ENSSSCG00000011102	NRP1	0.623761
10_56419242	10	56419242	-	ENSSSCG00000011102	NRP1	0.623761
10_56421545	10	56421545	-	ENSSSCG00000011102	NRP1	0.744298
10_57186404	10	57186404	-	ENSSSCG00000011103	PARD3	0.629572
10_57793959	10	57793959	-	ENSSSCG00000011104	CUL2	0.648702
10_57793991	10	57793991	-	ENSSSCG00000011104	CUL2	0.64655
10_57794002	10	57794002	-	ENSSSCG00000011104	CUL2	0.64655
10_57794033	10	57794033	-	ENSSSCG00000011104	CUL2	0.642214
10_57794053	10	57794053	-	ENSSSCG00000011104	CUL2	0.648702
10_57794278	10	57794278	-	ENSSSCG00000011104	CUL2	0.637885
10_60335912	10	60335912	+	ENSSSCG00000011120	USP6NL	0.84097
11_3635803	11	3635803	+	ENSSSCG00000035421	ATP8A2	0.762106
11_3635808	11	3635808	+	ENSSSCG00000035421	ATP8A2	0.764275
11_16975650	11	16975650	+	ENSSSCG00000009387	DLEU7	0.724995
11_25682354	11	25682354	+	ENSSSCG00000031378	KBTBD6	0.689338
11_48116969	11	48116969	+	ENSSSCG00000040184	LMO7	0.629261
11_48117078	11	48117078	+	ENSSSCG00000040184	LMO7	0.631616
11_50081257	11	50081257	-	ENSSSCG00000009477	EDNRB	0.681012
11_63626204	11	63626204	-	ENSSSCG00000009490	DCT	0.687353
11_65677675	11	65677675	+	ENSSSCG00000009503	HS6ST3	0.689088
12_20656633	12	20656633	+	ENSSSCG00000017416	DHX58	0.617172
12_21127075	12	21127075	+	ENSSSCG00000017444	KRT15	0.628031
12_33642106	12	33642106	+	ENSSSCG00000038505	MSI2	0.743854
12_38484928	12	38484928	+	ENSSSCG00000017693	AATF	0.66039
12_41623665	12	41623665	+	ENSSSCG00000040177	ASIC2	0.701395
12_44673690	12	44673690	+	ENSSSCG00000030358	SARM1	0.653261
12_48513785	12	48513785	-	ENSSSCG00000017832	METTL16	0.651261
13_714038	13	714038	+	ENSSSCG00000011178	CPNE4	0.670133
13_714599	13	714599	+	ENSSSCG00000011178	CPNE4	0.663006
13_714706	13	714706	+	ENSSSCG00000011178	CPNE4	0.677416
13_714992	13	714992	+	ENSSSCG00000011178	CPNE4	0.67267
13_2883768	13	2883768	+	ENSSSCG00000011193	BTD	0.717026
13_2883771	13	2883771	+	ENSSSCG00000011193	BTD	0.717026
13_15820407	13	15820407	+	ENSSSCG00000036381	RBMS3	0.650489
13_17653854	13	17653854	-	ENSSSCG00000011230	OSBPL10	0.707292
13_36241774	13	36241774	+	ENSSSCG00000027019	CACNA2D3	0.761064
13_36669659	13	36669659	+	ENSSSCG00000027019	CACNA2D3	0.656852
13_36670582	13	36670582	+	ENSSSCG00000027019	CACNA2D3	0.654351
13_36670676	13	36670676	+	ENSSSCG00000027019	CACNA2D3	0.634313
13_36670686	13	36670686	+	ENSSSCG00000027019	CACNA2D3	0.634313
13_36671115	13	36671115	+	ENSSSCG00000027019	CACNA2D3	0.619117
13_36671251	13	36671251	+	ENSSSCG00000027019	CACNA2D3	0.647003
13_38942237	13	38942237	-	ENSSSCG00000011463	IL17RD	0.640652
13_38944305	13	38944305	-	ENSSSCG00000011463	IL17RD	0.633511
13_38945166	13	38945166	-	ENSSSCG00000011463	IL17RD	0.638269
13_46047306	13	46047306	-	ENSSSCG00000011496	ADAMTS9	0.737857
13_65963696	13	65963696	+	ENSSSCG00000011546	MTMR14	0.718255
13_70914468	13	70914468	-	ENSSSCG00000028031	HDAC11	0.704949
13_70914980	13	70914980	-	ENSSSCG00000028031	HDAC11	0.704921
13_70915292	13	70915292	-	ENSSSCG00000028031	HDAC11	0.713058
13_70915480	13	70915480	-	ENSSSCG00000028031	HDAC11	0.713067
13_71915029	13	71915029	+	ENSSSCG00000011612	RPN1	0.741533
13_73122834	13	73122834	-	ENSSSCG00000031557	CHCHD6	0.658394
13_73122886	13	73122886	-	ENSSSCG00000031557	CHCHD6	0.662609
13_73153798	13	73153798	-	ENSSSCG00000031557	CHCHD6	0.727722
13_73154743	13	73154743	-	ENSSSCG00000031557	CHCHD6	0.818279
13_73156060	13	73156060	-	ENSSSCG00000031557	CHCHD6	0.840664
13_73157958	13	73157958	-	ENSSSCG00000031557	CHCHD6	0.705576
13_73160636	13	73160636	-	ENSSSCG00000031557	CHCHD6	0.756927
13_73210248	13	73210248	-	ENSSSCG00000031557	CHCHD6	0.726781
13_73210469	13	73210469	-	ENSSSCG00000031557	CHCHD6	0.724657
13_73211936	13	73211936	-	ENSSSCG00000031557	CHCHD6	0.701306
13_73213851	13	73213851	-	ENSSSCG00000031557	CHCHD6	0.726781
13_95399901	13	95399901	-	ENSSSCG00000026718	PLCH1	0.737329
13_95400066	13	95400066	-	ENSSSCG00000026718	PLCH1	0.737329
13_111037867	13	111037867	-	ENSSSCG00000020906	GHSR	0.6125
13_111038286	13	111038286	-	ENSSSCG00000020906	GHSR	0.612479
13_113945849	13	113945849	+	ENSSSCG00000023871	NAALADL2	0.626013
13_113950245	13	113950245	+	ENSSSCG00000023871	NAALADL2	0.631405
13_113950878	13	113950878	+	ENSSSCG00000023871	NAALADL2	0.660429
13_113950899	13	113950899	+	ENSSSCG00000023871	NAALADL2	0.628712
13_123979127	13	123979127	-	ENSSSCG00000022550	DGKG	0.66346
13_124475438	13	124475438	+	ENSSSCG00000011800	FETUB	0.642731
13_132208274	13	132208274	-	ENSSSCG00000035414	XXYLT1	0.679707
14_75413147	14	75413147	-	ENSSSCG00000010289	MICU1	0.728567
14_75935814	14	75935814	+	ENSSSCG00000025492	NUDT13	0.662639
14_125183673	14	125183673	+	ENSSSCG00000010652	FAM160B1	0.631126
14_131764324	14	131764324	+	ENSSSCG00000037530	TACC2	0.951767
15_9960092	15	9960092	+	ENSSSCG00000023746	LRP1B	0.711876
15_10477599	15	10477599	+	ENSSSCG00000023746	LRP1B	0.749916
15_10477982	15	10477982	+	ENSSSCG00000023746	LRP1B	0.768181
15_10477983	15	10477983	+	ENSSSCG00000023746	LRP1B	0.828555
15_10477985	15	10477985	+	ENSSSCG00000023746	LRP1B	0.768181
15_10478007	15	10478007	+	ENSSSCG00000023746	LRP1B	0.765895
15_10478172	15	10478172	+	ENSSSCG00000023746	LRP1B	0.675231
15_10478667	15	10478667	+	ENSSSCG00000023746	LRP1B	0.658248
15_11131654	15	11131654	+	ENSSSCG00000023746	LRP1B	0.605995
15_14681889	15	14681889	-	ENSSSCG00000040172	THSD7B	0.707325
15_17694189	15	17694189	-	ENSSSCG00000015701	MGAT5	0.774195
15_17694194	15	17694194	-	ENSSSCG00000015701	MGAT5	0.774195
15_17694203	15	17694203	-	ENSSSCG00000015701	MGAT5	0.77613
15_17694220	15	17694220	-	ENSSSCG00000015701	MGAT5	0.77613
15_17803243	15	17803243	-	ENSSSCG00000015701	MGAT5	0.670253
15_17852672	15	17852672	-	ENSSSCG00000015701	MGAT5	0.709133
15_21127737	15	21127737	+	ENSSSCG00000015711	DPP10	0.656618
15_37963899	15	37963899	+	ENSSSCG00000020934	SPAG11	0.695016
15_37963936	15	37963936	+	ENSSSCG00000020934	SPAG11	0.690618
15_38365376	15	38365376	-	ENSSSCG00000023328	GPM6A	0.640207
15_50726901	15	50726901	-	ENSSSCG00000015830	UNC5D	0.656212
15_50726947	15	50726947	-	ENSSSCG00000015830	UNC5D	0.640881
15_53164098	15	53164098	-	ENSSSCG00000015839	NRG1	0.662687
15_53164150	15	53164150	-	ENSSSCG00000015839	NRG1	0.670416
15_69236219	15	69236219	-	ENSSSCG00000015898	KCNH7	0.610029
15_69242508	15	69242508	-	ENSSSCG00000015898	KCNH7	0.619012
15_84587017	15	84587017	-	ENSSSCG00000016002	CCDC141	0.683934
15_85130491	15	85130491	-	ENSSSCG00000023181	ZNF385B	0.671663
15_85135362	15	85135362	-	ENSSSCG00000023181	ZNF385B	0.66199
15_85135363	15	85135363	-	ENSSSCG00000023181	ZNF385B	0.66199
15_85135950	15	85135950	-	ENSSSCG00000023181	ZNF385B	0.655928
15_126547301	15	126547301	-	ENSSSCG00000016237	DOCK10	0.616536
16_22477453	16	22477453	-	ENSSSCG00000016843	CPLANE1	0.660132
16_23410246	16	23410246	+	ENSSSCG00000016848	EGFLAM	0.622762
16_42794044	16	42794044	+	ENSSSCG00000016941	RNF180	0.789599
16_44435657	16	44435657	+	ENSSSCG00000016954	ERBIN	0.788128
16_45020032	16	45020032	+	ENSSSCG00000016956	MAST4	0.634141
16_45021212	16	45021212	+	ENSSSCG00000016956	MAST4	0.629852
16_45023536	16	45023536	+	ENSSSCG00000016956	MAST4	0.63199
16_45024807	16	45024807	+	ENSSSCG00000016956	MAST4	0.627716
16_45024822	16	45024822	+	ENSSSCG00000016956	MAST4	0.629862
16_45024841	16	45024841	+	ENSSSCG00000016956	MAST4	0.632
16_45024969	16	45024969	+	ENSSSCG00000016956	MAST4	0.634141
16_45025316	16	45025316	+	ENSSSCG00000016956	MAST4	0.627716
16_45030284	16	45030284	+	ENSSSCG00000016956	MAST4	0.629852
16_45032904	16	45032904	+	ENSSSCG00000016956	MAST4	0.634141
16_45033109	16	45033109	+	ENSSSCG00000016956	MAST4	0.632
16_45035478	16	45035478	+	ENSSSCG00000016956	MAST4	0.638428
16_46479663	16	46479663	+	ENSSSCG00000016958	PIK3R1	0.755278
16_48555651	16	48555651	-	ENSSSCG00000023818	MRPS27	0.637157
16_48555763	16	48555763	-	ENSSSCG00000023818	MRPS27	0.641718
16_50223645	16	50223645	-	ENSSSCG00000016979	NSG2	0.678329
16_50274756	16	50274756	-	ENSSSCG00000016979	NSG2	0.838645
16_50386936	16	50386936	-	ENSSSCG00000035512	C5orf47	0.939038
16_53114037	16	53114037	-	ENSSSCG00000017000	RANBP17	0.868636
16_65724173	16	65724173	+	ENSSSCG00000017052	ADAM19	0.625366
17_2770960	17	2770960	-	ENSSSCG00000038257	SGCZ	0.708047
17_5183575	17	5183575	+	ENSSSCG00000006987	SLC7A2	0.699375
17_5261587	17	5261587	+	ENSSSCG00000006987	SLC7A2	0.616898
17_22808208	17	22808208	+	ENSSSCG00000030112	MACROD2	0.674145
17_22808259	17	22808259	+	ENSSSCG00000030112	MACROD2	0.669836
17_22808274	17	22808274	+	ENSSSCG00000030112	MACROD2	0.669836
17_22808337	17	22808337	+	ENSSSCG00000030112	MACROD2	0.669826
17_22808351	17	22808351	+	ENSSSCG00000030112	MACROD2	0.666153
17_22808372	17	22808372	+	ENSSSCG00000030112	MACROD2	0.668342
17_22808614	17	22808614	+	ENSSSCG00000030112	MACROD2	0.657446
17_22808624	17	22808624	+	ENSSSCG00000030112	MACROD2	0.659618
17_22808632	17	22808632	+	ENSSSCG00000030112	MACROD2	0.657446
17_32845689	17	32845689	+	ENSSSCG00000007170	CPXM1	0.761681
17_36457976	17	36457976	+	ENSSSCG00000007253	MAPRE1	0.61262
17_36457976	17	36457976	+	ENSSSCG00000034812	EFCAB8	0.61262
17_37596868	17	37596868	+	ENSSSCG00000007275	RALY	0.660146
17_38276894	17	38276894	+	ENSSSCG00000007286	ACSS2	0.706216
17_38616287	17	38616287	+	ENSSSCG00000040160	MMP24	0.637579
17_38616287	17	38616287	-	ENSSSCG00000022864	EIF6	0.637579
17_38616288	17	38616288	+	ENSSSCG00000040160	MMP24	0.637579
17_38616288	17	38616288	-	ENSSSCG00000022864	EIF6	0.637579
17_39302077	17	39302077	+	ENSSSCG00000007313	CNBD2	0.680312
17_40368360	17	40368360	+	ENSSSCG00000028227	RPN2	0.656166
17_44143739	17	44143739	-	ENSSSCG00000007360	CHD6	0.889014
17_44164638	17	44164638	-	ENSSSCG00000007360	CHD6	0.77351
17_44164670	17	44164670	-	ENSSSCG00000007360	CHD6	0.77351
17_44164671	17	44164671	-	ENSSSCG00000007360	CHD6	0.77351
17_44164672	17	44164672	-	ENSSSCG00000007360	CHD6	0.77351
17_44164680	17	44164680	-	ENSSSCG00000007360	CHD6	0.77351
17_44164705	17	44164705	-	ENSSSCG00000007360	CHD6	0.776119
17_44164707	17	44164707	-	ENSSSCG00000007360	CHD6	0.776119
17_44164745	17	44164745	-	ENSSSCG00000007360	CHD6	0.76694
17_44164784	17	44164784	-	ENSSSCG00000007360	CHD6	0.762558
17_44164874	17	44164874	-	ENSSSCG00000007360	CHD6	0.770905
17_44164913	17	44164913	-	ENSSSCG00000007360	CHD6	0.770905
17_44172843	17	44172843	-	ENSSSCG00000007360	CHD6	0.680352
17_44173404	17	44173404	-	ENSSSCG00000007360	CHD6	0.72767
17_44173446	17	44173446	-	ENSSSCG00000007360	CHD6	0.727929
17_44251699	17	44251699	-	ENSSSCG00000007360	CHD6	0.669275
17_47306075	17	47306075	+	ENSSSCG00000007381	YWHAB	0.640442
18_8451552	18	8451552	-	ENSSSCG00000016493	TMEM178B	0.947696
18_8451570	18	8451570	-	ENSSSCG00000016493	TMEM178B	0.924524
18_12115281	18	12115281	+	ENSSSCG00000016521	DGKI	0.819226
18_12455382	18	12455382	-	ENSSSCG00000032532	CHRM2	0.803348
18_20114895	18	20114895	-	ENSSSCG00000040464	LEP	0.618631
18_20116247	18	20116247	-	ENSSSCG00000040464	LEP	0.619786
18_20116291	18	20116291	-	ENSSSCG00000040464	LEP	0.622002

## Sheet: Supplementary Table S7
Supplementary Table S7. List of 362 potential candidate genes in the first 1% of Fst in LI pigs compared with other Chinese pigs.
SNP name	Chr	Pos	strand	Gene Name	Ensembl Gene ID	Fst
1_7130736	1	7130736	-	ENSSSCG00000004039	SLC22A3	0.83509
1_9427501	1	9427501	-	ENSSSCG00000035027	ZDHHC14	0.930742
1_11882641	1	11882641	-	ENSSSCG00000004070	SCAF8	0.740505
1_12068335	1	12068335	-	ENSSSCG00000004070	SCAF8	0.773576
1_12088373	1	12088373	-	ENSSSCG00000004070	SCAF8	0.734987
1_12089488	1	12089488	-	ENSSSCG00000004070	SCAF8	0.742792
1_14694843	1	14694843	-	ENSSSCG00000004087	CCDC170	0.829651
1_14694884	1	14694884	-	ENSSSCG00000004087	CCDC170	0.858058
1_14729261	1	14729261	-	ENSSSCG00000004087	CCDC170	0.780391
1_14729541	1	14729541	-	ENSSSCG00000004087	CCDC170	0.765402
1_14733379	1	14733379	-	ENSSSCG00000004087	CCDC170	0.767562
1_14733805	1	14733805	-	ENSSSCG00000004087	CCDC170	0.778245
1_14734227	1	14734227	-	ENSSSCG00000004087	CCDC170	0.771768
1_14869017	1	14869017	+	ENSSSCG00000004090	ZBTB2	0.81272
1_14869018	1	14869018	+	ENSSSCG00000004090	ZBTB2	0.830231
1_14869027	1	14869027	+	ENSSSCG00000004090	ZBTB2	0.830231
1_14869534	1	14869534	+	ENSSSCG00000004090	ZBTB2	0.823907
1_14870197	1	14870197	+	ENSSSCG00000004090	ZBTB2	0.819341
1_14870829	1	14870829	+	ENSSSCG00000004090	ZBTB2	0.763146
1_14932991	1	14932991	-	ENSSSCG00000031733	AKAP12	0.73677
1_14944379	1	14944379	-	ENSSSCG00000031733	AKAP12	0.727802
1_14944389	1	14944389	-	ENSSSCG00000031733	AKAP12	0.794057
1_14944604	1	14944604	-	ENSSSCG00000031733	AKAP12	0.796386
1_14944775	1	14944775	-	ENSSSCG00000031733	AKAP12	0.801405
1_14944810	1	14944810	-	ENSSSCG00000031733	AKAP12	0.803408
1_14945765	1	14945765	-	ENSSSCG00000031733	AKAP12	0.796402
1_14946350	1	14946350	-	ENSSSCG00000031733	AKAP12	0.808103
1_14946397	1	14946397	-	ENSSSCG00000031733	AKAP12	0.799399
1_14946721	1	14946721	-	ENSSSCG00000031733	AKAP12	0.80075
1_15189308	1	15189308	-	ENSSSCG00000004092	MTHFD1L	0.727814
1_15212998	1	15212998	-	ENSSSCG00000004092	MTHFD1L	0.739749
1_15213029	1	15213029	-	ENSSSCG00000004092	MTHFD1L	0.820478
1_15214160	1	15214160	-	ENSSSCG00000004092	MTHFD1L	0.818421
1_15214227	1	15214227	-	ENSSSCG00000004092	MTHFD1L	0.791846
1_15214330	1	15214330	-	ENSSSCG00000004092	MTHFD1L	0.810199
1_17533209	1	17533209	-	ENSSSCG00000033175	SASH1	0.740851
1_17533458	1	17533458	-	ENSSSCG00000033175	SASH1	0.73074
1_17535213	1	17535213	-	ENSSSCG00000033175	SASH1	0.797745
1_17604157	1	17604157	-	ENSSSCG00000033175	SASH1	0.873748
1_25948260	1	25948260	+	ENSSSCG00000004149	NHSL1	0.781583
1_35202142	1	35202142	+	ENSSSCG00000004209	PTPRK	0.867748
1_38161769	1	38161769	-	ENSSSCG00000036607	NKAIN2	0.727056
1_38297216	1	38297216	-	ENSSSCG00000036607	NKAIN2	0.869066
1_39033875	1	39033875	-	ENSSSCG00000036607	NKAIN2	0.797846
1_39033880	1	39033880	-	ENSSSCG00000036607	NKAIN2	0.797846
1_39034232	1	39034232	-	ENSSSCG00000036607	NKAIN2	0.800158
1_39034877	1	39034877	-	ENSSSCG00000036607	NKAIN2	0.793239
1_39035073	1	39035073	-	ENSSSCG00000036607	NKAIN2	0.774961
1_39035249	1	39035249	-	ENSSSCG00000036607	NKAIN2	0.807088
1_39035649	1	39035649	-	ENSSSCG00000036607	NKAIN2	0.804775
1_39035849	1	39035849	-	ENSSSCG00000036607	NKAIN2	0.807088
1_39035879	1	39035879	-	ENSSSCG00000036607	NKAIN2	0.807088
1_39035913	1	39035913	-	ENSSSCG00000036607	NKAIN2	0.807088
1_39035991	1	39035991	-	ENSSSCG00000036607	NKAIN2	0.807088
1_40017608	1	40017608	-	ENSSSCG00000004236	PKIB	0.777605
1_43553788	1	43553788	+	ENSSSCG00000004249	CEP85L	0.810681
1_55686230	1	55686230	+	ENSSSCG00000035281	ZNF292	0.796997
1_56474093	1	56474093	-	ENSSSCG00000004309	CNR1	0.807566
1_57773102	1	57773102	-	ENSSSCG00000004328	MDN1	0.795014
1_64151297	1	64151297	+	ENSSSCG00000027002	KLHL32	0.734756
1_64152921	1	64152921	+	ENSSSCG00000027002	KLHL32	0.734756
1_64153414	1	64153414	+	ENSSSCG00000027002	KLHL32	0.734763
1_64154601	1	64154601	+	ENSSSCG00000027002	KLHL32	0.730638
1_64156050	1	64156050	+	ENSSSCG00000027002	KLHL32	0.734763
1_64157413	1	64157413	+	ENSSSCG00000027002	KLHL32	0.733224
1_64202681	1	64202681	+	ENSSSCG00000027002	KLHL32	0.763914
1_64203259	1	64203259	+	ENSSSCG00000027002	KLHL32	0.759911
1_71563587	1	71563587	-	ENSSSCG00000004368	PREP	0.875533
1_71563598	1	71563598	-	ENSSSCG00000004368	PREP	0.820229
1_71655873	1	71655873	-	ENSSSCG00000004368	PREP	0.792871
1_71658958	1	71658958	-	ENSSSCG00000004368	PREP	0.77416
1_71660648	1	71660648	-	ENSSSCG00000004368	PREP	0.796624
1_71661093	1	71661093	-	ENSSSCG00000004368	PREP	0.79851
1_71664385	1	71664385	-	ENSSSCG00000004368	PREP	0.792878
1_71667518	1	71667518	-	ENSSSCG00000004368	PREP	0.729999
1_73274403	1	73274403	-	ENSSSCG00000031159	BEND3	0.778814
1_73274403	1	73274403	-	ENSSSCG00000036168	PDSS2	0.778814
1_73311073	1	73311073	-	ENSSSCG00000031159	BEND3	0.725595
1_73311073	1	73311073	-	ENSSSCG00000036168	PDSS2	0.725595
1_76180179	1	76180179	+	ENSSSCG00000004403	CDC40	0.743992
1_85755361	1	85755361	-	ENSSSCG00000004465	BCKDHB	0.730132
1_86371462	1	86371462	-	ENSSSCG00000032015	SH3BGRL2	0.743423
1_89939756	1	89939756	+	ENSSSCG00000004477	IMPG1	0.888717
1_90246388	1	90246388	-	ENSSSCG00000020702	SENP6	0.72664
1_90299207	1	90299207	-	ENSSSCG00000020702	SENP6	0.752538
1_90299939	1	90299939	-	ENSSSCG00000020702	SENP6	0.733467
1_96129263	1	96129263	-	ENSSSCG00000004503	LOXHD1	0.768959
1_103065299	1	103065299	+	ENSSSCG00000040836	DCC	0.770916
1_106697548	1	106697548	+	ENSSSCG00000038971	ST8SIA3	0.853515
1_108218991	1	108218991	+	ENSSSCG00000004561	HERC1	0.784992
1_108222489	1	108222489	+	ENSSSCG00000004561	HERC1	0.781044
1_108223033	1	108223033	+	ENSSSCG00000004561	HERC1	0.781044
1_108224402	1	108224402	+	ENSSSCG00000004561	HERC1	0.87712
1_108224640	1	108224640	+	ENSSSCG00000004561	HERC1	0.771226
1_132770142	1	132770142	+	ENSSSCG00000004791	RASGRP1	0.81797
1_132775770	1	132775770	+	ENSSSCG00000004791	RASGRP1	0.802949
1_132775878	1	132775878	+	ENSSSCG00000004791	RASGRP1	0.81609
1_132776055	1	132776055	+	ENSSSCG00000004791	RASGRP1	0.816097
1_132777327	1	132777327	+	ENSSSCG00000004791	RASGRP1	0.821742
1_132778337	1	132778337	+	ENSSSCG00000004791	RASGRP1	0.814198
1_132779156	1	132779156	+	ENSSSCG00000004791	RASGRP1	0.814219
1_146121298	1	146121298	-	ENSSSCG00000004857	ATP9B	0.890379
1_220910614	1	220910614	-	ENSSSCG00000005236	DMRT1	0.726792
1_228133135	1	228133135	-	ENSSSCG00000005272	NMRK1	0.727454
1_239389749	1	239389749	+	ENSSSCG00000005366	NCBP1	0.880001
1_239464663	1	239464663	+	ENSSSCG00000005366	NCBP1	0.754503
1_239464673	1	239464673	+	ENSSSCG00000005366	NCBP1	0.754503
1_241575510	1	241575510	+	ENSSSCG00000005385	NR4A3	0.80712
1_246199866	1	246199866	-	ENSSSCG00000005423	ABCA1	0.761343
1_246902670	1	246902670	+	ENSSSCG00000005426	FSD1L	0.815025
1_261755958	1	261755958	+	ENSSSCG00000005524	DAB2IP	0.816655
1_264309057	1	264309057	-	ENSSSCG00000005585	DENND1A	0.791009
1_265376988	1	265376988	-	ENSSSCG00000005589	NR6A1	0.771896
1_270081546	1	270081546	+	ENSSSCG00000024341	USP20	0.817928
1_270081546	1	270081546	-	ENSSSCG00000005689	FNBP1	0.817928
1_271131653	1	271131653	+	ENSSSCG00000005711	NUP214	0.882569
1_271184444	1	271184444	+	ENSSSCG00000005711	NUP214	0.739073
1_272267014	1	272267014	+	ENSSSCG00000005727	CFAP77	0.861232
1_273747427	1	273747427	+	ENSSSCG00000038220	RXRA	0.830702
1_274253914	1	274253914	+	ENSSSCG00000029715	OLFM1	0.830354
2_14650359	2	14650359	-	ENSSSCG00000023709	PTPRJ	0.871348
2_18875774	2	18875774	-	ENSSSCG00000013284	TTC17	0.759386
2_25362219	2	25362219	-	ENSSSCG00000013295	TRIM44	0.750377
2_27589224	2	27589224	-	ENSSSCG00000013312	HIPK3	0.730763
2_27593595	2	27593595	-	ENSSSCG00000013312	HIPK3	0.827865
2_27594265	2	27594265	-	ENSSSCG00000013312	HIPK3	0.831675
2_77176005	2	77176005	-	ENSSSCG00000013427	DAZAP1	0.770189
2_77176005	2	77176005	-	ENSSSCG00000038701	EFNA2	0.770189
2_77605519	2	77605519	-	ENSSSCG00000013425	MISP	0.853996
2_80992121	2	80992121	+	ENSSSCG00000022508	UIMC1	0.79884
2_80992121	2	80992121	+	ENSSSCG00000014048	HK3	0.79884
2_115326253	2	115326253	-	ENSSSCG00000014196	TMEM232	0.732505
2_115326662	2	115326662	-	ENSSSCG00000014196	TMEM232	0.735192
2_115326689	2	115326689	-	ENSSSCG00000014196	TMEM232	0.735192
2_115327144	2	115327144	-	ENSSSCG00000014196	TMEM232	0.735192
2_115327212	2	115327212	-	ENSSSCG00000014196	TMEM232	0.735192
2_115327968	2	115327968	-	ENSSSCG00000014196	TMEM232	0.735192
2_115328077	2	115328077	-	ENSSSCG00000014196	TMEM232	0.725662
2_115328078	2	115328078	-	ENSSSCG00000014196	TMEM232	0.731074
2_115328931	2	115328931	-	ENSSSCG00000014196	TMEM232	0.731074
2_115329048	2	115329048	-	ENSSSCG00000014196	TMEM232	0.729814
2_115329069	2	115329069	-	ENSSSCG00000014196	TMEM232	0.732495
2_115329796	2	115329796	-	ENSSSCG00000014196	TMEM232	0.731074
2_115331106	2	115331106	-	ENSSSCG00000014196	TMEM232	0.732495
2_115331197	2	115331197	-	ENSSSCG00000014196	TMEM232	0.729814
2_115331717	2	115331717	-	ENSSSCG00000014196	TMEM232	0.735192
2_115331867	2	115331867	-	ENSSSCG00000014196	TMEM232	0.735192
2_115332174	2	115332174	-	ENSSSCG00000014196	TMEM232	0.735192
2_115332716	2	115332716	-	ENSSSCG00000014196	TMEM232	0.735192
2_115345978	2	115345978	-	ENSSSCG00000014196	TMEM232	0.737884
2_115346217	2	115346217	-	ENSSSCG00000014196	TMEM232	0.737884
2_115346634	2	115346634	-	ENSSSCG00000014196	TMEM232	0.737884
2_115346852	2	115346852	-	ENSSSCG00000014196	TMEM232	0.735192
2_115346872	2	115346872	-	ENSSSCG00000014196	TMEM232	0.735192
2_115346893	2	115346893	-	ENSSSCG00000014196	TMEM232	0.735192
2_115346979	2	115346979	-	ENSSSCG00000014196	TMEM232	0.735192
2_115347009	2	115347009	-	ENSSSCG00000014196	TMEM232	0.735192
2_115347057	2	115347057	-	ENSSSCG00000014196	TMEM232	0.735192
2_115347097	2	115347097	-	ENSSSCG00000014196	TMEM232	0.735192
2_115347149	2	115347149	-	ENSSSCG00000014196	TMEM232	0.735192
2_115347284	2	115347284	-	ENSSSCG00000014196	TMEM232	0.735192
2_115347317	2	115347317	-	ENSSSCG00000014196	TMEM232	0.735192
2_115347695	2	115347695	-	ENSSSCG00000014196	TMEM232	0.735192
2_115348224	2	115348224	-	ENSSSCG00000014196	TMEM232	0.735192
2_115348226	2	115348226	-	ENSSSCG00000014196	TMEM232	0.735192
2_115348395	2	115348395	-	ENSSSCG00000014196	TMEM232	0.735192
2_115348414	2	115348414	-	ENSSSCG00000014196	TMEM232	0.735192
2_115348557	2	115348557	-	ENSSSCG00000014196	TMEM232	0.735192
2_115350308	2	115350308	-	ENSSSCG00000014196	TMEM232	0.735192
2_115350937	2	115350937	-	ENSSSCG00000014196	TMEM232	0.735825
2_115350945	2	115350945	-	ENSSSCG00000014196	TMEM232	0.735825
2_115350959	2	115350959	-	ENSSSCG00000014196	TMEM232	0.735825
2_115350963	2	115350963	-	ENSSSCG00000014196	TMEM232	0.735825
2_115350983	2	115350983	-	ENSSSCG00000014196	TMEM232	0.735825
2_115351640	2	115351640	-	ENSSSCG00000014196	TMEM232	0.733134
2_115352499	2	115352499	-	ENSSSCG00000014196	TMEM232	0.731055
2_115353789	2	115353789	-	ENSSSCG00000014196	TMEM232	0.735192
2_115354991	2	115354991	-	ENSSSCG00000014196	TMEM232	0.735192
2_115356659	2	115356659	-	ENSSSCG00000014196	TMEM232	0.737884
2_115357072	2	115357072	-	ENSSSCG00000014196	TMEM232	0.735192
2_115357076	2	115357076	-	ENSSSCG00000014196	TMEM232	0.735192
2_115357818	2	115357818	-	ENSSSCG00000014196	TMEM232	0.735192
2_115360528	2	115360528	-	ENSSSCG00000014196	TMEM232	0.727721
2_115363119	2	115363119	-	ENSSSCG00000014196	TMEM232	0.732505
2_115363120	2	115363120	-	ENSSSCG00000014196	TMEM232	0.735192
2_115363465	2	115363465	-	ENSSSCG00000014196	TMEM232	0.735192
2_115363592	2	115363592	-	ENSSSCG00000014196	TMEM232	0.735192
2_115371860	2	115371860	-	ENSSSCG00000014196	TMEM232	0.732495
2_115373204	2	115373204	-	ENSSSCG00000014196	TMEM232	0.732495
2_115373412	2	115373412	-	ENSSSCG00000014196	TMEM232	0.737884
2_115496539	2	115496539	-	ENSSSCG00000014196	TMEM232	0.735192
2_123069683	2	123069683	+	ENSSSCG00000027857	DMXL1	0.824839
2_123070258	2	123070258	+	ENSSSCG00000027857	DMXL1	0.851682
2_123070322	2	123070322	+	ENSSSCG00000027857	DMXL1	0.853624
2_126696595	2	126696595	+	ENSSSCG00000014238	PRDM6	0.739202
2_126696659	2	126696659	+	ENSSSCG00000014238	PRDM6	0.745682
2_133536320	2	133536320	+	ENSSSCG00000033213	LYRM7	0.866695
2_133536320	2	133536320	+	ENSSSCG00000036686	CDC42SE2	0.866695
2_143321656	2	143321656	-	ENSSSCG00000014391	ARAP3	0.771359
2_148212315	2	148212315	-	ENSSSCG00000028976	PPP2R2B	0.792335
2_148550613	2	148550613	+	ENSSSCG00000014418	STK32A	0.827673
3_6037740	3	6037740	-	ENSSSCG00000030153	SMURF1	0.833812
3_11626584	3	11626584	+	ENSSSCG00000007720	GTF2IRD1	0.770512
3_11626806	3	11626806	+	ENSSSCG00000007720	GTF2IRD1	0.782484
3_11626827	3	11626827	+	ENSSSCG00000007720	GTF2IRD1	0.782484
3_11626893	3	11626893	+	ENSSSCG00000007720	GTF2IRD1	0.777346
3_11627138	3	11627138	+	ENSSSCG00000007720	GTF2IRD1	0.777346
3_11627172	3	11627172	+	ENSSSCG00000007720	GTF2IRD1	0.777353
3_11627173	3	11627173	+	ENSSSCG00000007720	GTF2IRD1	0.777353
3_12014941	3	12014941	-	ENSSSCG00000024045	CASTOR2	0.766207
3_12014959	3	12014959	-	ENSSSCG00000024045	CASTOR2	0.764348
3_20557277	3	20557277	-	ENSSSCG00000036837	HS3ST4	0.776655
3_20557291	3	20557291	-	ENSSSCG00000036837	HS3ST4	0.773395
3_22847945	3	22847945	-	ENSSSCG00000028923	SCNN1B	0.769046
3_32107696	3	32107696	-	ENSSSCG00000026569	CLEC16A	0.735258
3_32118724	3	32118724	-	ENSSSCG00000026569	CLEC16A	0.771078
3_35174454	3	35174454	-	ENSSSCG00000007917	RBFOX1	0.847076
3_38122142	3	38122142	+	ENSSSCG00000007950	ADCY9	0.910492
3_38693725	3	38693725	+	ENSSSCG00000007956	NLRC3	0.871525
3_39228776	3	39228776	-	ENSSSCG00000028381	FLYWCH1	0.766231
3_39369356	3	39369356	-	ENSSSCG00000035594	PRSS22	0.754443
3_39372250	3	39372250	-	ENSSSCG00000035594	PRSS22	0.730437
3_39374996	3	39374996	-	ENSSSCG00000035594	PRSS22	0.739139
3_39461849	3	39461849	-	ENSSSCG00000037719	PDPK1	0.739012
3_39851799	3	39851799	+	ENSSSCG00000008041	PKD1	0.761517
3_40220788	3	40220788	-	ENSSSCG00000008018	MAPK8IP3	0.745757
3_40221435	3	40221435	-	ENSSSCG00000008018	MAPK8IP3	0.745757
3_40228884	3	40228884	-	ENSSSCG00000008018	MAPK8IP3	0.765634
3_40379884	3	40379884	-	ENSSSCG00000008022	TELO2	0.727835
3_40379913	3	40379913	-	ENSSSCG00000008022	TELO2	0.727835
3_41174776	3	41174776	-	ENSSSCG00000007992	PIGQ	0.863666
3_42563000	3	42563000	+	ENSSSCG00000028185	FGD3	0.789199
3_42563699	3	42563699	+	ENSSSCG00000028185	FGD3	0.733803
3_45940448	3	45940448	-	ENSSSCG00000008119	KCNIP3	0.764187
3_45941970	3	45941970	-	ENSSSCG00000008119	KCNIP3	0.750556
3_47489076	3	47489076	+	ENSSSCG00000008135	CCDC138	0.741402
3_47535462	3	47535462	-	ENSSSCG00000008136	RANBP2	0.783364
3_47535655	3	47535655	-	ENSSSCG00000008136	RANBP2	0.77269
3_47790620	3	47790620	-	ENSSSCG00000037616	SULT1C4	0.749219
3_51936053	3	51936053	-	ENSSSCG00000032795	IL1RL1	0.908158
3_52003761	3	52003761	-	ENSSSCG00000023550	IL1RL2	0.823761
3_52004356	3	52004356	-	ENSSSCG00000023550	IL1RL2	0.798538
3_52004359	3	52004359	-	ENSSSCG00000023550	IL1RL2	0.796611
3_52004385	3	52004385	-	ENSSSCG00000023550	IL1RL2	0.81064
3_52266586	3	52266586	-	ENSSSCG00000008162	IL1R1	0.902232
3_68606583	3	68606583	+	ENSSSCG00000008281	RTKN	0.88661
3_71713627	3	71713627	+	ENSSSCG00000008321	FIGLA	0.791443
3_72474784	3	72474784	+	ENSSSCG00000033099	ASPRV1	0.752217
3_77217162	3	77217162	+	ENSSSCG00000037002	SERTAD2	0.760933
3_80695265	3	80695265	-	ENSSSCG00000008386	KIAA1841	0.788704
3_83346589	3	83346589	+	ENSSSCG00000008394	FANCL	0.905566
3_90048768	3	90048768	+	ENSSSCG00000026180	NRXN1	0.747868
3_90048905	3	90048905	+	ENSSSCG00000026180	NRXN1	0.765364
3_90161166	3	90161166	+	ENSSSCG00000026180	NRXN1	0.72696
3_92723609	3	92723609	+	ENSSSCG00000029485	FBXO11	0.879529
3_92741418	3	92741418	+	ENSSSCG00000029485	FBXO11	0.800209
3_92742673	3	92742673	+	ENSSSCG00000029485	FBXO11	0.747823
3_92743002	3	92743002	+	ENSSSCG00000029485	FBXO11	0.754411
3_92766052	3	92766052	+	ENSSSCG00000029485	FBXO11	0.842032
3_93828846	3	93828846	-	ENSSSCG00000008437	SOCS5	0.796803
3_94599697	3	94599697	-	ENSSSCG00000008444	PRKCE	0.867336
3_101149884	3	101149884	+	ENSSSCG00000008478	SOS 1	0.76017
3_101149888	3	101149888	+	ENSSSCG00000008478	SOS 1	0.76017
3_107530867	3	107530867	+	ENSSSCG00000008516	DPY30	0.819709
3_111840581	3	111840581	-	ENSSSCG00000039557	TRIM54	0.874228
3_120230928	3	120230928	-	ENSSSCG00000008615	VSNL1	0.753029
3_120230977	3	120230977	-	ENSSSCG00000008615	VSNL1	0.745733
4_914562	4	914562	-	ENSSSCG00000035933	MAPK15	0.910799
4_7060445	4	7060445	+	ENSSSCG00000030947	ZFAT	0.74509
4_7063950	4	7063950	+	ENSSSCG00000030947	ZFAT	0.752912
4_7065126	4	7065126	+	ENSSSCG00000030947	ZFAT	0.7373
4_7067888	4	7067888	+	ENSSSCG00000030947	ZFAT	0.730701
4_7067945	4	7067945	+	ENSSSCG00000030947	ZFAT	0.732701
4_7067949	4	7067949	+	ENSSSCG00000030947	ZFAT	0.732701
4_7067985	4	7067985	+	ENSSSCG00000030947	ZFAT	0.734703
4_7067986	4	7067986	+	ENSSSCG00000030947	ZFAT	0.734703
4_7068041	4	7068041	+	ENSSSCG00000030947	ZFAT	0.728711
4_7068069	4	7068069	+	ENSSSCG00000030947	ZFAT	0.741157
4_7074663	4	7074663	+	ENSSSCG00000030947	ZFAT	0.758561
4_7074676	4	7074676	+	ENSSSCG00000030947	ZFAT	0.752086
4_7075970	4	7075970	+	ENSSSCG00000030947	ZFAT	0.844124
4_24720906	4	24720906	+	ENSSSCG00000031031	CSMD3	0.8059
4_24720908	4	24720908	+	ENSSSCG00000031031	CSMD3	0.8059
4_25636011	4	25636011	+	ENSSSCG00000031031	CSMD3	0.817956
4_30777415	4	30777415	-	ENSSSCG00000006037	OXR1	0.736788
4_30777428	4	30777428	-	ENSSSCG00000006037	OXR1	0.851446
4_32068390	4	32068390	-	ENSSSCG00000006038	ZFPM2	0.775572
4_33522509	4	33522509	-	ENSSSCG00000031957	RIMS2	0.763655
4_36782824	4	36782824	-	ENSSSCG00000027587	SPAG1	0.784128
4_36782871	4	36782871	-	ENSSSCG00000027587	SPAG1	0.77832
4_37484071	4	37484071	-	ENSSSCG00000006071	VPS13B	0.857179
4_67723007	4	67723007	-	ENSSSCG00000006202	CSPP1	0.888924
4_76266438	4	76266438	-	ENSSSCG00000031813	XKR4	0.770805
4_76266691	4	76266691	-	ENSSSCG00000031813	XKR4	0.784457
4_76266709	4	76266709	-	ENSSSCG00000031813	XKR4	0.79924
4_76266865	4	76266865	-	ENSSSCG00000031813	XKR4	0.801714
4_76267333	4	76267333	-	ENSSSCG00000031813	XKR4	0.783459
4_79954867	4	79954867	-	ENSSSCG00000006277	SPIDR	0.738607
4_81950375	4	81950375	-	ENSSSCG00000006296	ATP1B1	0.811619
4_82848437	4	82848437	+	ENSSSCG00000006302	GPR161	0.843137
4_82855537	4	82855537	+	ENSSSCG00000006302	GPR161	0.837166
4_82859669	4	82859669	+	ENSSSCG00000006302	GPR161	0.830792
4_82859831	4	82859831	+	ENSSSCG00000006302	GPR161	0.83698
4_82860553	4	82860553	+	ENSSSCG00000006302	GPR161	0.836987
4_82861313	4	82861313	+	ENSSSCG00000006302	GPR161	0.828733
4_82890191	4	82890191	+	ENSSSCG00000006302	GPR161	0.727454
4_82921535	4	82921535	+	ENSSSCG00000006302	GPR161	0.847101
4_82921535	4	82921535	-	ENSSSCG00000006303	DCAF6	0.847101
4_91016112	4	91016112	-	ENSSSCG00000024008	OR10J1	0.759755
4_91235160	4	91235160	-	ENSSSCG00000006415	CADM3	0.851481
4_91235263	4	91235263	-	ENSSSCG00000006415	CADM3	0.863222
4_91980413	4	91980413	+	ENSSSCG00000030145	OR10T2	0.908132
4_92968445	4	92968445	+	ENSSSCG00000024970	ETV3	0.748046
4_93120353	4	93120353	+	ENSSSCG00000006461	ARHGEF11	0.873156
4_94541942	4	94541942	+	ENSSSCG00000026149	PKLR	0.882906
4_95430762	4	95430762	-	ENSSSCG00000006550	ATP8B2	0.912234
4_95533483	4	95533483	+	ENSSSCG00000006555	C1orf189	0.766912
4_98560693	4	98560693	+	ENSSSCG00000039314	MCL1	0.805005
4_98560693	4	98560693	+	ENSSSCG00000006653	ENSA	0.805005
4_103747532	4	103747532	-	ENSSSCG00000006735	PTGFRN	0.750497
4_106671809	4	106671809	+	ENSSSCG00000006762	AP4B1	0.770564
4_106671809	4	106671809	+	ENSSSCG00000038970	BCL2L15	0.770564
4_106675400	4	106675400	+	ENSSSCG00000006762	AP4B1	0.747158
4_106675400	4	106675400	+	ENSSSCG00000038970	BCL2L15	0.747158
4_106675418	4	106675418	+	ENSSSCG00000006762	AP4B1	0.74524
4_106675418	4	106675418	+	ENSSSCG00000038970	BCL2L15	0.74524
4_106714212	4	106714212	+	ENSSSCG00000006764	PTPN22	0.779628
4_106714514	4	106714514	+	ENSSSCG00000006764	PTPN22	0.783828
4_106714532	4	106714532	+	ENSSSCG00000006764	PTPN22	0.781876
4_106714547	4	106714547	+	ENSSSCG00000006764	PTPN22	0.783828
4_106717265	4	106717265	+	ENSSSCG00000006764	PTPN22	0.766332
4_106717484	4	106717484	+	ENSSSCG00000006764	PTPN22	0.730024
4_106717606	4	106717606	+	ENSSSCG00000006764	PTPN22	0.787732
4_106717717	4	106717717	+	ENSSSCG00000006764	PTPN22	0.785783
4_106717888	4	106717888	+	ENSSSCG00000006764	PTPN22	0.77799
4_106718263	4	106718263	+	ENSSSCG00000006764	PTPN22	0.789684
4_106719440	4	106719440	+	ENSSSCG00000006764	PTPN22	0.774097
4_106722334	4	106722334	+	ENSSSCG00000006764	PTPN22	0.788002
4_106723462	4	106723462	+	ENSSSCG00000006764	PTPN22	0.774104
4_109166948	4	109166948	-	ENSSSCG00000029918	CEPT1	0.821446
4_118670792	4	118670792	+	ENSSSCG00000006873	FRRS1	0.856154
4_119180449	4	119180449	-	ENSSSCG00000006877	SNX7	0.861095
4_119239524	4	119239524	-	ENSSSCG00000006877	SNX7	0.742545
4_124482750	4	124482750	+	ENSSSCG00000006901	EVI5	0.744748
4_130653640	4	130653640	+	ENSSSCG00000025691	BCL10	0.773935
5_12851627	5	12851627	-	ENSSSCG00000000162	BTBD11	0.910097
5_32482157	5	32482157	-	ENSSSCG00000032963	IFNG	0.836022
5_32482265	5	32482265	-	ENSSSCG00000032963	IFNG	0.838195
5_32568809	5	32568809	-	ENSSSCG00000039976	IL26	0.730442
5_32601904	5	32601904	-	ENSSSCG00000000482	IL22	0.728259
5_32672595	5	32672595	-	ENSSSCG00000000483	MDM1	0.749575
5_42646183	5	42646183	+	ENSSSCG00000022636	DENND5B	0.808514
5_42646616	5	42646616	+	ENSSSCG00000022636	DENND5B	0.806503
5_42646920	5	42646920	+	ENSSSCG00000022636	DENND5B	0.808514
5_42652915	5	42652915	+	ENSSSCG00000022636	DENND5B	0.810802
5_42657117	5	42657117	+	ENSSSCG00000022636	DENND5B	0.808798
5_42669986	5	42669986	+	ENSSSCG00000022636	DENND5B	0.808514
5_42681668	5	42681668	+	ENSSSCG00000022636	DENND5B	0.80421
5_42703222	5	42703222	+	ENSSSCG00000022636	DENND5B	0.73452
5_42705809	5	42705809	+	ENSSSCG00000022636	DENND5B	0.806503
5_42705935	5	42705935	+	ENSSSCG00000022636	DENND5B	0.743397
5_42707096	5	42707096	+	ENSSSCG00000022636	DENND5B	0.807392
5_42707324	5	42707324	+	ENSSSCG00000022636	DENND5B	0.750041
5_42707332	5	42707332	+	ENSSSCG00000022636	DENND5B	0.750041
5_42707602	5	42707602	+	ENSSSCG00000022636	DENND5B	0.808798
5_42708513	5	42708513	+	ENSSSCG00000022636	DENND5B	0.808798
5_42715099	5	42715099	+	ENSSSCG00000022636	DENND5B	0.770167
5_42724753	5	42724753	+	ENSSSCG00000022636	DENND5B	0.773249
5_42727261	5	42727261	+	ENSSSCG00000022636	DENND5B	0.806784
5_42730124	5	42730124	+	ENSSSCG00000022636	DENND5B	0.806503
5_42734014	5	42734014	+	ENSSSCG00000022636	DENND5B	0.738976
5_42736388	5	42736388	+	ENSSSCG00000022636	DENND5B	0.738968
5_42738325	5	42738325	+	ENSSSCG00000022636	DENND5B	0.80015
5_42740269	5	42740269	+	ENSSSCG00000022636	DENND5B	0.806503
5_42744144	5	42744144	+	ENSSSCG00000022636	DENND5B	0.806503
5_42744701	5	42744701	+	ENSSSCG00000022636	DENND5B	0.810809
5_42748058	5	42748058	+	ENSSSCG00000022636	DENND5B	0.802756
5_42749050	5	42749050	+	ENSSSCG00000022636	DENND5B	0.752257
5_42749535	5	42749535	+	ENSSSCG00000022636	DENND5B	0.743397
5_42750277	5	42750277	+	ENSSSCG00000022636	DENND5B	0.806503
5_42754074	5	42754074	+	ENSSSCG00000022636	DENND5B	0.808522
5_42756906	5	42756906	+	ENSSSCG00000022636	DENND5B	0.808522
5_42757307	5	42757307	+	ENSSSCG00000022636	DENND5B	0.743396
5_42758516	5	42758516	+	ENSSSCG00000022636	DENND5B	0.808522
5_42761168	5	42761168	+	ENSSSCG00000022636	DENND5B	0.8131
5_42762477	5	42762477	+	ENSSSCG00000022636	DENND5B	0.73896
5_42767509	5	42767509	+	ENSSSCG00000022636	DENND5B	0.808522
5_42770504	5	42770504	+	ENSSSCG00000022636	DENND5B	0.77413
5_42770912	5	42770912	+	ENSSSCG00000022636	DENND5B	0.808798
5_42772394	5	42772394	+	ENSSSCG00000022636	DENND5B	0.774526
5_42774735	5	42774735	+	ENSSSCG00000022636	DENND5B	0.772003
5_42785293	5	42785293	+	ENSSSCG00000022636	DENND5B	0.806503
5_42787720	5	42787720	+	ENSSSCG00000022636	DENND5B	0.79051
5_42788018	5	42788018	+	ENSSSCG00000022636	DENND5B	0.79051
5_42797194	5	42797194	+	ENSSSCG00000022636	DENND5B	0.806503
5_42800822	5	42800822	+	ENSSSCG00000022636	DENND5B	0.804203
5_42801893	5	42801893	+	ENSSSCG00000022636	DENND5B	0.806503
5_42811532	5	42811532	+	ENSSSCG00000022636	DENND5B	0.811096
5_42812165	5	42812165	+	ENSSSCG00000022636	DENND5B	0.806503
5_42815106	5	42815106	+	ENSSSCG00000022636	DENND5B	0.774807
5_42816657	5	42816657	+	ENSSSCG00000022636	DENND5B	0.770287
5_42817615	5	42817615	+	ENSSSCG00000022636	DENND5B	0.806503
5_42818363	5	42818363	+	ENSSSCG00000022636	DENND5B	0.772416
5_42819045	5	42819045	+	ENSSSCG00000022636	DENND5B	0.80421
5_42942858	5	42942858	+	ENSSSCG00000037732	SINHCAF	0.824788
5_42963777	5	42963777	+	ENSSSCG00000037732	SINHCAF	0.735795
5_42965093	5	42965093	+	ENSSSCG00000037732	SINHCAF	0.744354
5_42967607	5	42967607	+	ENSSSCG00000037732	SINHCAF	0.730006
5_42967737	5	42967737	+	ENSSSCG00000037732	SINHCAF	0.731934
5_43048890	5	43048890	+	ENSSSCG00000022611	CAPRIN2	0.754369
5_43052586	5	43052586	+	ENSSSCG00000022611	CAPRIN2	0.737015
5_43052593	5	43052593	+	ENSSSCG00000022611	CAPRIN2	0.734849
5_43053566	5	43053566	+	ENSSSCG00000022611	CAPRIN2	0.765308
5_43055371	5	43055371	+	ENSSSCG00000022611	CAPRIN2	0.732662
5_43063091	5	43063091	+	ENSSSCG00000022611	CAPRIN2	0.754372
5_43065585	5	43065585	+	ENSSSCG00000022611	CAPRIN2	0.756567
5_43069467	5	43069467	+	ENSSSCG00000022611	CAPRIN2	0.76313
5_43071474	5	43071474	+	ENSSSCG00000022611	CAPRIN2	0.758744
5_43071690	5	43071690	+	ENSSSCG00000022611	CAPRIN2	0.76313
5_43072051	5	43072051	+	ENSSSCG00000022611	CAPRIN2	0.76313
5_43072333	5	43072333	+	ENSSSCG00000022611	CAPRIN2	0.760932
5_43072383	5	43072383	+	ENSSSCG00000022611	CAPRIN2	0.760932
5_43072514	5	43072514	+	ENSSSCG00000022611	CAPRIN2	0.758737
5_43073318	5	43073318	+	ENSSSCG00000022611	CAPRIN2	0.760932
5_43074468	5	43074468	+	ENSSSCG00000022611	CAPRIN2	0.765331
5_43074616	5	43074616	+	ENSSSCG00000022611	CAPRIN2	0.76094
5_43074645	5	43074645	+	ENSSSCG00000022611	CAPRIN2	0.76313
5_43075211	5	43075211	+	ENSSSCG00000022611	CAPRIN2	0.769717
5_43075810	5	43075810	+	ENSSSCG00000022611	CAPRIN2	0.736944
5_43077073	5	43077073	+	ENSSSCG00000022611	CAPRIN2	0.767519
5_43077261	5	43077261	+	ENSSSCG00000022611	CAPRIN2	0.769717
5_43078101	5	43078101	+	ENSSSCG00000022611	CAPRIN2	0.756539
5_43078303	5	43078303	+	ENSSSCG00000022611	CAPRIN2	0.756544
5_43080050	5	43080050	+	ENSSSCG00000022611	CAPRIN2	0.771919
5_43080102	5	43080102	+	ENSSSCG00000022611	CAPRIN2	0.767519
5_43081141	5	43081141	+	ENSSSCG00000022611	CAPRIN2	0.763122
5_43082000	5	43082000	+	ENSSSCG00000022611	CAPRIN2	0.763115
5_43082703	5	43082703	+	ENSSSCG00000022611	CAPRIN2	0.76971
5_43082929	5	43082929	+	ENSSSCG00000022611	CAPRIN2	0.765323
5_43082960	5	43082960	+	ENSSSCG00000022611	CAPRIN2	0.76313
5_43083033	5	43083033	+	ENSSSCG00000022611	CAPRIN2	0.765323
5_43083309	5	43083309	+	ENSSSCG00000022611	CAPRIN2	0.769717
5_43083410	5	43083410	+	ENSSSCG00000022611	CAPRIN2	0.760932
5_43083436	5	43083436	+	ENSSSCG00000022611	CAPRIN2	0.760932
5_43083674	5	43083674	+	ENSSSCG00000022611	CAPRIN2	0.765323
5_43083971	5	43083971	+	ENSSSCG00000022611	CAPRIN2	0.767519
5_43084409	5	43084409	+	ENSSSCG00000022611	CAPRIN2	0.769717
5_43085084	5	43085084	+	ENSSSCG00000022611	CAPRIN2	0.765315
5_43086296	5	43086296	+	ENSSSCG00000022611	CAPRIN2	0.769717
5_43099782	5	43099782	+	ENSSSCG00000000534	IPO8	0.760908
5_43099791	5	43099791	+	ENSSSCG00000000534	IPO8	0.756528
5_43100319	5	43100319	+	ENSSSCG00000000534	IPO8	0.758721
5_43100421	5	43100421	+	ENSSSCG00000000534	IPO8	0.765348
5_43100558	5	43100558	+	ENSSSCG00000000534	IPO8	0.767561
5_43101677	5	43101677	+	ENSSSCG00000000534	IPO8	0.769725
5_43101717	5	43101717	+	ENSSSCG00000000534	IPO8	0.767561
5_43101803	5	43101803	+	ENSSSCG00000000534	IPO8	0.765348
5_43102203	5	43102203	+	ENSSSCG00000000534	IPO8	0.763146
5_43103095	5	43103095	+	ENSSSCG00000000534	IPO8	0.767561
5_43103390	5	43103390	+	ENSSSCG00000000534	IPO8	0.767561
5_43103402	5	43103402	+	ENSSSCG00000000534	IPO8	0.763154
5_43103780	5	43103780	+	ENSSSCG00000000534	IPO8	0.760938
5_43104198	5	43104198	+	ENSSSCG00000000534	IPO8	0.763146
5_43104221	5	43104221	+	ENSSSCG00000000534	IPO8	0.771919
5_43104357	5	43104357	+	ENSSSCG00000000534	IPO8	0.769717
5_43105279	5	43105279	+	ENSSSCG00000000534	IPO8	0.756536
5_43105581	5	43105581	+	ENSSSCG00000000534	IPO8	0.765315
5_43106032	5	43106032	+	ENSSSCG00000000534	IPO8	0.763122
5_43106358	5	43106358	+	ENSSSCG00000000534	IPO8	0.750013
5_43107545	5	43107545	+	ENSSSCG00000000534	IPO8	0.774066
5_43107659	5	43107659	+	ENSSSCG00000000534	IPO8	0.769664
5_43107708	5	43107708	+	ENSSSCG00000000534	IPO8	0.767519
5_43110475	5	43110475	+	ENSSSCG00000000534	IPO8	0.769717
5_43116880	5	43116880	+	ENSSSCG00000000534	IPO8	0.767467
5_43126897	5	43126897	+	ENSSSCG00000000534	IPO8	0.73916
5_43128881	5	43128881	+	ENSSSCG00000000534	IPO8	0.767511
5_43135319	5	43135319	+	ENSSSCG00000000534	IPO8	0.765315
5_43137044	5	43137044	+	ENSSSCG00000000534	IPO8	0.769717
5_43138239	5	43138239	+	ENSSSCG00000000534	IPO8	0.756528
5_43141084	5	43141084	+	ENSSSCG00000000534	IPO8	0.754385
5_43141335	5	43141335	+	ENSSSCG00000000534	IPO8	0.769717
5_43141410	5	43141410	+	ENSSSCG00000000534	IPO8	0.771919
5_43142835	5	43142835	+	ENSSSCG00000000534	IPO8	0.754369
5_43144160	5	43144160	+	ENSSSCG00000000534	IPO8	0.767519
5_43147603	5	43147603	+	ENSSSCG00000000534	IPO8	0.765315
5_43152792	5	43152792	+	ENSSSCG00000000534	IPO8	0.767519
5_43157098	5	43157098	+	ENSSSCG00000000534	IPO8	0.732686
5_43165165	5	43165165	+	ENSSSCG00000000534	IPO8	0.745675
5_45202115	5	45202115	-	ENSSSCG00000024232	CCDC91	0.929417
5_45222449	5	45222449	-	ENSSSCG00000024232	CCDC91	0.906434
5_45329380	5	45329380	-	ENSSSCG00000024232	CCDC91	0.777839
5_45329611	5	45329611	-	ENSSSCG00000024232	CCDC91	0.773233
5_45952132	5	45952132	-	ENSSSCG00000000545	KLHL42	0.748782
5_45960299	5	45960299	+	ENSSSCG00000000546	MANSC4	0.805773
5_45961266	5	45961266	+	ENSSSCG00000000546	MANSC4	0.833569
5_45962381	5	45962381	+	ENSSSCG00000000546	MANSC4	0.809699
5_45963095	5	45963095	+	ENSSSCG00000000546	MANSC4	0.787057
5_45963119	5	45963119	+	ENSSSCG00000000546	MANSC4	0.8033
5_45965333	5	45965333	+	ENSSSCG00000000546	MANSC4	0.809699
5_46292085	5	46292085	-	ENSSSCG00000000551	ARNTL2	0.820648
5_46292086	5	46292086	-	ENSSSCG00000000551	ARNTL2	0.820648
5_46451962	5	46451962	-	ENSSSCG00000000551	ARNTL2	0.796341
5_46453192	5	46453192	-	ENSSSCG00000000551	ARNTL2	0.78075
5_46539970	5	46539970	-	ENSSSCG00000022288	STK38L	0.853697
5_46592244	5	46592244	-	ENSSSCG00000022288	STK38L	0.80626
5_46592401	5	46592401	-	ENSSSCG00000022288	STK38L	0.726211
5_46599819	5	46599819	-	ENSSSCG00000022288	STK38L	0.79002
5_46602837	5	46602837	-	ENSSSCG00000022288	STK38L	0.790339
5_46603481	5	46603481	-	ENSSSCG00000022288	STK38L	0.762105
5_46604041	5	46604041	-	ENSSSCG00000022288	STK38L	0.810833
5_46984420	5	46984420	+	ENSSSCG00000000555	ITPR2	0.956129
5_47147808	5	47147808	+	ENSSSCG00000000555	ITPR2	0.776722
5_48308826	5	48308826	+	ENSSSCG00000027144	LMNTD1	0.771951
5_48308954	5	48308954	+	ENSSSCG00000027144	LMNTD1	0.776195
5_48310610	5	48310610	+	ENSSSCG00000027144	LMNTD1	0.77408
5_48817930	5	48817930	+	ENSSSCG00000029163	BCAT1	0.909933
5_48817931	5	48817931	+	ENSSSCG00000029163	BCAT1	0.909933
5_49701578	5	49701578	+	ENSSSCG00000000567	SOX5	0.913641
5_52125294	5	52125294	+	ENSSSCG00000000584	SLCO1A2	0.875072
5_52737350	5	52737350	-	ENSSSCG00000028662	PDE3A	0.806233
5_53643653	5	53643653	-	ENSSSCG00000000587	AEBP2	0.805936
5_54408495	5	54408495	+	ENSSSCG00000000590	PLCZ1	0.790819
5_56718402	5	56718402	-	ENSSSCG00000021410	STRAP	0.853418
5_57731859	5	57731859	+	ENSSSCG00000000607	ART4	0.822777
5_57735104	5	57735104	+	ENSSSCG00000000607	ART4	0.840674
5_58094775	5	58094775	-	ENSSSCG00000000612	ATF7IP	0.730913
5_58095555	5	58095555	-	ENSSSCG00000000612	ATF7IP	0.743204
5_58104129	5	58104129	-	ENSSSCG00000000612	ATF7IP	0.746205
5_58107395	5	58107395	-	ENSSSCG00000000612	ATF7IP	0.744182
5_58136425	5	58136425	-	ENSSSCG00000000612	ATF7IP	0.850524
5_58136439	5	58136439	-	ENSSSCG00000000612	ATF7IP	0.848774
5_64350471	5	64350471	-	ENSSSCG00000000709	PLEKHG6	0.746864
5_68926009	5	68926009	-	ENSSSCG00000023976	DCP1B	0.824525
5_70058745	5	70058745	-	ENSSSCG00000000770	MICAL3	0.821188
5_70089114	5	70089114	-	ENSSSCG00000000770	MICAL3	0.761085
5_71598988	5	71598988	-	ENSSSCG00000000783	SLC2A13	0.849739
5_71599447	5	71599447	-	ENSSSCG00000000783	SLC2A13	0.847908
5_71599622	5	71599622	-	ENSSSCG00000000783	SLC2A13	0.853955
5_71599694	5	71599694	-	ENSSSCG00000000783	SLC2A13	0.847901
5_71600622	5	71600622	-	ENSSSCG00000000783	SLC2A13	0.852157
5_71602818	5	71602818	-	ENSSSCG00000000783	SLC2A13	0.853955
5_83563389	5	83563389	-	ENSSSCG00000000874	GAS2L3	0.749924
5_84120256	5	84120256	+	ENSSSCG00000022083	ANKS1B	0.808859
5_94094122	5	94094122	+	ENSSSCG00000035495	KITLG	0.833097
5_94094150	5	94094150	+	ENSSSCG00000035495	KITLG	0.833097
5_94094174	5	94094174	+	ENSSSCG00000035495	KITLG	0.833097
5_100627611	5	100627611	+	ENSSSCG00000040348	LIN7A	0.765477
5_100627631	5	100627631	+	ENSSSCG00000040348	LIN7A	0.765477
5_103034628	5	103034628	-	ENSSSCG00000029249	NAV3	0.763529
6_12102011	6	12102011	+	ENSSSCG00000002706	ADAT1	0.746339
6_12102015	6	12102015	+	ENSSSCG00000002706	ADAT1	0.748267
6_19869309	6	19869309	+	ENSSSCG00000002807	USB1	0.859539
6_19869309	6	19869309	-	ENSSSCG00000002805	CFAP20	0.859539
6_98382760	6	98382760	-	ENSSSCG00000037264	RAB31	0.890018
6_98467627	6	98467627	+	ENSSSCG00000003679	PPP4R1	0.773754
6_98702688	6	98702688	-	ENSSSCG00000003682	ANKRD12	0.754489
6_98706200	6	98706200	-	ENSSSCG00000003682	ANKRD12	0.748065
6_104535457	6	104535457	+	ENSSSCG00000034816	METTL4	0.738197
6_132250186	6	132250186	-	ENSSSCG00000003761	ADGRL2	0.731939
6_132250222	6	132250222	-	ENSSSCG00000003761	ADGRL2	0.728734
6_143049365	6	143049365	-	ENSSSCG00000003793	LRRC7	0.873761
6_158407997	6	158407997	+	ENSSSCG00000028506	YIPF1	0.727206
7_7602011	7	7602011	+	ENSSSCG00000051558	SYCP2L	0.79404
7_15539781	7	15539781	-	ENSSSCG00000001078	MBOAT1	0.731231
7_15539787	7	15539787	-	ENSSSCG00000001078	MBOAT1	0.733045
7_15539806	7	15539806	-	ENSSSCG00000001078	MBOAT1	0.734862
7_15544563	7	15544563	-	ENSSSCG00000001078	MBOAT1	0.734862
7_15545311	7	15545311	-	ENSSSCG00000001078	MBOAT1	0.731876
7_15545371	7	15545371	-	ENSSSCG00000001078	MBOAT1	0.725803
7_15546084	7	15546084	-	ENSSSCG00000001078	MBOAT1	0.729403
7_15555505	7	15555505	-	ENSSSCG00000001078	MBOAT1	0.735479
7_15559583	7	15559583	-	ENSSSCG00000001078	MBOAT1	0.72944
7_15596835	7	15596835	-	ENSSSCG00000001078	MBOAT1	0.754097
7_50996708	7	50996708	+	ENSSSCG00000031963	SAXO2	0.817534
7_59342923	7	59342923	+	ENSSSCG00000001909	STRA6	0.824033
7_77719954	7	77719954	+	ENSSSCG00000002127	CHD8	0.822177
7_77774519	7	77774519	+	ENSSSCG00000002127	CHD8	0.730786
7_77809703	7	77809703	+	ENSSSCG00000022900	SUPT16H	0.807947
7_80372879	7	80372879	+	ENSSSCG00000002245	KATNBL1	0.770582
7_80717882	7	80717882	-	ENSSSCG00000033958	RYR3	0.843581
7_102472006	7	102472006	+	ENSSSCG00000028942	NRXN3	0.762713
7_102475518	7	102475518	+	ENSSSCG00000028942	NRXN3	0.724457
7_102475969	7	102475969	+	ENSSSCG00000028942	NRXN3	0.750554
7_102475973	7	102475973	+	ENSSSCG00000028942	NRXN3	0.72445
7_102476308	7	102476308	+	ENSSSCG00000028942	NRXN3	0.740465
7_102476453	7	102476453	+	ENSSSCG00000028942	NRXN3	0.746518
7_102476814	7	102476814	+	ENSSSCG00000028942	NRXN3	0.754583
7_102479725	7	102479725	+	ENSSSCG00000028942	NRXN3	0.756631
7_102482055	7	102482055	+	ENSSSCG00000028942	NRXN3	0.754591
7_103121257	7	103121257	-	ENSSSCG00000040638	DIO2	0.906002
7_103122017	7	103122017	-	ENSSSCG00000040638	DIO2	0.906002
7_103122358	7	103122358	-	ENSSSCG00000040638	DIO2	0.896523
7_103122386	7	103122386	-	ENSSSCG00000040638	DIO2	0.904106
7_103124056	7	103124056	-	ENSSSCG00000040638	DIO2	0.907906
7_103124104	7	103124104	-	ENSSSCG00000040638	DIO2	0.904106
7_110553839	7	110553839	-	ENSSSCG00000002427	EML5	0.778786
7_110554453	7	110554453	-	ENSSSCG00000002427	EML5	0.776786
7_110555054	7	110555054	-	ENSSSCG00000002427	EML5	0.770199
7_110556391	7	110556391	-	ENSSSCG00000002427	EML5	0.772315
7_110571899	7	110571899	-	ENSSSCG00000002427	EML5	0.790703
7_114245880	7	114245880	+	ENSSSCG00000002455	GOLGA5	0.752181
7_114245912	7	114245912	+	ENSSSCG00000002455	GOLGA5	0.749981
7_114245913	7	114245913	+	ENSSSCG00000002455	GOLGA5	0.749981
7_114245985	7	114245985	+	ENSSSCG00000002455	GOLGA5	0.752181
7_114246131	7	114246131	+	ENSSSCG00000002455	GOLGA5	0.749978
7_114246146	7	114246146	+	ENSSSCG00000002455	GOLGA5	0.749986
7_114246997	7	114246997	+	ENSSSCG00000002455	GOLGA5	0.7325
7_114247694	7	114247694	+	ENSSSCG00000002455	GOLGA5	0.758823
7_114247759	7	114247759	+	ENSSSCG00000002455	GOLGA5	0.769881
7_114247790	7	114247790	+	ENSSSCG00000002455	GOLGA5	0.767601
7_114247948	7	114247948	+	ENSSSCG00000002455	GOLGA5	0.763238
8_11920188	8	11920188	-	ENSSSCG00000029227	LDB2	0.891432
8_11920591	8	11920591	-	ENSSSCG00000029227	LDB2	0.87764
8_32070527	8	32070527	-	ENSSSCG00000022168	APBB2	0.825249
8_32070610	8	32070610	-	ENSSSCG00000022168	APBB2	0.838844
8_32070658	8	32070658	-	ENSSSCG00000022168	APBB2	0.834293
8_32070744	8	32070744	-	ENSSSCG00000022168	APBB2	0.822922
8_32070745	8	32070745	-	ENSSSCG00000022168	APBB2	0.822922
8_32071522	8	32071522	-	ENSSSCG00000022168	APBB2	0.822922
8_32071767	8	32071767	-	ENSSSCG00000022168	APBB2	0.832018
8_42856627	8	42856627	-	ENSSSCG00000008853	TLL1	0.816669
8_79392379	8	79392379	+	ENSSSCG00000035623	IQCM	0.735963
8_80738357	8	80738357	-	ENSSSCG00000009029	ARHGAP10	0.847137
8_81132898	8	81132898	-	ENSSSCG00000030044	TMEM184C	0.79367
8_82131053	8	82131053	+	ENSSSCG00000009035	SLC10A7	0.834907
8_82803733	8	82803733	-	ENSSSCG00000042317	C4orf51	0.739274
8_84190979	8	84190979	-	ENSSSCG00000009047	SMARCA5	0.84485
8_113132806	8	113132806	+	ENSSSCG00000039813	COL25A1	0.887009
8_115560043	8	115560043	+	ENSSSCG00000021784	TBCK	0.89573
8_115599394	8	115599394	+	ENSSSCG00000021784	TBCK	0.725716
8_121810397	8	121810397	+	ENSSSCG00000029813	TSPAN5	0.726204
8_121811324	8	121811324	+	ENSSSCG00000029813	TSPAN5	0.72765
8_124520464	8	124520464	+	ENSSSCG00000021874	UNC5C	0.727782
8_124521787	8	124521787	+	ENSSSCG00000021874	UNC5C	0.725546
8_124523140	8	124523140	+	ENSSSCG00000021874	UNC5C	0.72779
8_124523479	8	124523479	+	ENSSSCG00000021874	UNC5C	0.732235
8_124763157	8	124763157	-	ENSSSCG00000029621	BMPR1B	0.94157
8_131302861	8	131302861	-	ENSSSCG00000009220	DMP1	0.84798
8_131302902	8	131302902	-	ENSSSCG00000009220	DMP1	0.84798
8_131302903	8	131302903	-	ENSSSCG00000009220	DMP1	0.84798
8_131304430	8	131304430	-	ENSSSCG00000009220	DMP1	0.838367
8_131305017	8	131305017	-	ENSSSCG00000009220	DMP1	0.838388
8_131305480	8	131305480	-	ENSSSCG00000009220	DMP1	0.846058
8_131306163	8	131306163	-	ENSSSCG00000009220	DMP1	0.847987
8_131306218	8	131306218	-	ENSSSCG00000009220	DMP1	0.862246
8_131306258	8	131306258	-	ENSSSCG00000009220	DMP1	0.868214
8_131306324	8	131306324	-	ENSSSCG00000009220	DMP1	0.821478
8_131306384	8	131306384	-	ENSSSCG00000009220	DMP1	0.806077
8_131306445	8	131306445	-	ENSSSCG00000009220	DMP1	0.847987
8_131306602	8	131306602	-	ENSSSCG00000009220	DMP1	0.810144
8_131327164	8	131327164	-	ENSSSCG00000009220	DMP1	0.902085
8_131327164	8	131327164	-	ENSSSCG00000009221	DSPP	0.902085
8_131847475	8	131847475	-	ENSSSCG00000023593	AFF1	0.759496
9_31926731	9	31926731	+	ENSSSCG00000014976	ARHGAP42	0.777353
9_34554495	9	34554495	-	ENSSSCG00000014994	PDGFD	0.737379
9_34554512	9	34554512	-	ENSSSCG00000014994	PDGFD	0.739236
9_38378761	9	38378761	+	ENSSSCG00000035945	FDX1	0.772665
9_38378779	9	38378779	+	ENSSSCG00000035945	FDX1	0.772658
9_39050938	9	39050938	+	ENSSSCG00000015018	C11orf53	0.847297
9_39502889	9	39502889	-	ENSSSCG00000029538	PPP2R1B	0.741541
9_39503209	9	39503209	-	ENSSSCG00000029538	PPP2R1B	0.750668
9_39503370	9	39503370	-	ENSSSCG00000029538	PPP2R1B	0.74335
9_39503413	9	39503413	-	ENSSSCG00000029538	PPP2R1B	0.739682
9_39503430	9	39503430	-	ENSSSCG00000029538	PPP2R1B	0.741512
9_39503579	9	39503579	-	ENSSSCG00000029538	PPP2R1B	0.731194
9_39504108	9	39504108	-	ENSSSCG00000029538	PPP2R1B	0.745741
9_39504699	9	39504699	-	ENSSSCG00000029538	PPP2R1B	0.741504
9_39505112	9	39505112	-	ENSSSCG00000029538	PPP2R1B	0.763543
9_49808248	9	49808248	+	ENSSSCG00000015137	CRTAM	0.881993
9_50067628	9	50067628	-	ENSSSCG00000022961	CLMP	0.789832
9_52657055	9	52657055	-	ENSSSCG00000015212	FEZ1	0.780732
9_54054121	9	54054121	-	ENSSSCG00000015234	KIRREL3	0.761246
9_56288680	9	56288680	+	ENSSSCG00000036157	BARX2	0.755192
9_56862778	9	56862778	+	ENSSSCG00000015244	APLP2	0.770639
9_56868698	9	56868698	+	ENSSSCG00000015244	APLP2	0.739425
9_65087825	9	65087825	-	ENSSSCG00000015283	PIK3C2B	0.729167
9_67279293	9	67279293	+	ENSSSCG00000015649	DYRK3	0.83314
9_68337913	9	68337913	+	ENSSSCG00000015297	ADAM22	0.904276
9_68337918	9	68337918	+	ENSSSCG00000015297	ADAM22	0.904276
9_68338087	9	68338087	+	ENSSSCG00000015297	ADAM22	0.910077
9_68338114	9	68338114	+	ENSSSCG00000015297	ADAM22	0.909883
9_70543490	9	70543490	+	ENSSSCG00000015307	CDK14	0.745529
9_70804754	9	70804754	+	ENSSSCG00000015307	CDK14	0.756606
9_70805285	9	70805285	+	ENSSSCG00000015307	CDK14	0.747745
9_70809470	9	70809470	+	ENSSSCG00000015307	CDK14	0.747745
9_70817530	9	70817530	+	ENSSSCG00000015307	CDK14	0.756606
9_70820053	9	70820053	+	ENSSSCG00000015307	CDK14	0.758836
9_70839403	9	70839403	+	ENSSSCG00000015307	CDK14	0.752162
9_70840744	9	70840744	+	ENSSSCG00000015307	CDK14	0.747751
9_70900637	9	70900637	+	ENSSSCG00000015307	CDK14	0.845113
9_70902026	9	70902026	+	ENSSSCG00000015307	CDK14	0.843051
9_70902975	9	70902975	+	ENSSSCG00000015307	CDK14	0.86112
9_70903191	9	70903191	+	ENSSSCG00000015307	CDK14	0.838939
9_70903314	9	70903314	+	ENSSSCG00000015307	CDK14	0.840997
9_70903603	9	70903603	+	ENSSSCG00000015307	CDK14	0.843051
9_70905017	9	70905017	+	ENSSSCG00000015307	CDK14	0.833267
9_70905445	9	70905445	+	ENSSSCG00000015307	CDK14	0.85112
9_70906357	9	70906357	+	ENSSSCG00000015307	CDK14	0.745625
9_70906394	9	70906394	+	ENSSSCG00000015307	CDK14	0.859119
9_70907825	9	70907825	+	ENSSSCG00000015307	CDK14	0.853113
9_70908206	9	70908206	+	ENSSSCG00000015307	CDK14	0.859112
9_70908212	9	70908212	+	ENSSSCG00000015307	CDK14	0.859112
9_70908437	9	70908437	+	ENSSSCG00000015307	CDK14	0.85312
9_70908523	9	70908523	+	ENSSSCG00000015307	CDK14	0.857106
9_70908541	9	70908541	+	ENSSSCG00000015307	CDK14	0.751767
9_70909198	9	70909198	+	ENSSSCG00000015307	CDK14	0.86112
9_70909309	9	70909309	+	ENSSSCG00000015307	CDK14	0.857113
9_70917789	9	70917789	+	ENSSSCG00000015307	CDK14	0.877054
9_70917851	9	70917851	+	ENSSSCG00000015307	CDK14	0.878986
9_70919280	9	70919280	+	ENSSSCG00000015307	CDK14	0.880927
9_70919742	9	70919742	+	ENSSSCG00000015307	CDK14	0.871262
9_70931634	9	70931634	+	ENSSSCG00000015307	CDK14	0.806701
9_70932966	9	70932966	+	ENSSSCG00000015307	CDK14	0.808587
9_70938573	9	70938573	+	ENSSSCG00000015307	CDK14	0.865411
9_70938753	9	70938753	+	ENSSSCG00000015307	CDK14	0.865418
9_70938923	9	70938923	+	ENSSSCG00000015307	CDK14	0.871214
9_70940039	9	70940039	+	ENSSSCG00000015307	CDK14	0.869273
9_70940831	9	70940831	+	ENSSSCG00000015307	CDK14	0.808228
9_70941527	9	70941527	+	ENSSSCG00000015307	CDK14	0.871214
9_70941778	9	70941778	+	ENSSSCG00000015307	CDK14	0.863462
9_70941911	9	70941911	+	ENSSSCG00000015307	CDK14	0.869273
9_70943093	9	70943093	+	ENSSSCG00000015307	CDK14	0.869273
9_70943099	9	70943099	+	ENSSSCG00000015307	CDK14	0.869273
9_70944773	9	70944773	+	ENSSSCG00000015307	CDK14	0.871214
9_70951256	9	70951256	+	ENSSSCG00000015307	CDK14	0.827132
9_70952404	9	70952404	+	ENSSSCG00000015307	CDK14	0.827132
9_70952633	9	70952633	+	ENSSSCG00000015307	CDK14	0.741512
9_70952984	9	70952984	+	ENSSSCG00000015307	CDK14	0.811992
9_70953628	9	70953628	+	ENSSSCG00000015307	CDK14	0.832843
9_70953631	9	70953631	+	ENSSSCG00000015307	CDK14	0.832843
9_70953921	9	70953921	+	ENSSSCG00000015307	CDK14	0.739689
9_70954569	9	70954569	+	ENSSSCG00000015307	CDK14	0.834961
9_70955483	9	70955483	+	ENSSSCG00000015307	CDK14	0.830936
9_70960427	9	70960427	+	ENSSSCG00000015307	CDK14	0.830943
9_70986142	9	70986142	+	ENSSSCG00000015307	CDK14	0.841092
9_70986399	9	70986399	+	ENSSSCG00000015307	CDK14	0.814083
9_70987357	9	70987357	+	ENSSSCG00000015307	CDK14	0.812239
9_70987376	9	70987376	+	ENSSSCG00000015307	CDK14	0.812239
9_70987391	9	70987391	+	ENSSSCG00000015307	CDK14	0.812232
9_70987429	9	70987429	+	ENSSSCG00000015307	CDK14	0.812239
9_70987508	9	70987508	+	ENSSSCG00000015307	CDK14	0.754183
9_70988055	9	70988055	+	ENSSSCG00000015307	CDK14	0.817769
9_70988254	9	70988254	+	ENSSSCG00000015307	CDK14	0.814076
9_70988700	9	70988700	+	ENSSSCG00000015307	CDK14	0.819603
9_70988909	9	70988909	+	ENSSSCG00000015307	CDK14	0.817769
9_70988975	9	70988975	+	ENSSSCG00000015307	CDK14	0.814076
9_70989228	9	70989228	+	ENSSSCG00000015307	CDK14	0.810382
9_70989489	9	70989489	+	ENSSSCG00000015307	CDK14	0.809334
9_70989524	9	70989524	+	ENSSSCG00000015307	CDK14	0.819589
9_70989590	9	70989590	+	ENSSSCG00000015307	CDK14	0.823636
9_70989614	9	70989614	+	ENSSSCG00000015307	CDK14	0.821446
9_70989902	9	70989902	+	ENSSSCG00000015307	CDK14	0.815915
9_70989924	9	70989924	+	ENSSSCG00000015307	CDK14	0.817762
9_70990006	9	70990006	+	ENSSSCG00000015307	CDK14	0.817762
9_70990075	9	70990075	+	ENSSSCG00000015307	CDK14	0.815915
9_70990133	9	70990133	+	ENSSSCG00000015307	CDK14	0.815922
9_70990230	9	70990230	+	ENSSSCG00000015307	CDK14	0.81961
9_70990284	9	70990284	+	ENSSSCG00000015307	CDK14	0.814069
9_70990304	9	70990304	+	ENSSSCG00000015307	CDK14	0.806702
9_70990320	9	70990320	+	ENSSSCG00000015307	CDK14	0.792045
9_70990331	9	70990331	+	ENSSSCG00000015307	CDK14	0.782929
9_70990521	9	70990521	+	ENSSSCG00000015307	CDK14	0.814452
9_70990696	9	70990696	+	ENSSSCG00000015307	CDK14	0.815922
9_70990697	9	70990697	+	ENSSSCG00000015307	CDK14	0.815922
9_70990719	9	70990719	+	ENSSSCG00000015307	CDK14	0.815922
9_70991698	9	70991698	+	ENSSSCG00000015307	CDK14	0.81961
9_70992385	9	70992385	+	ENSSSCG00000015307	CDK14	0.815922
9_70993375	9	70993375	+	ENSSSCG00000015307	CDK14	0.819957
9_70994172	9	70994172	+	ENSSSCG00000015307	CDK14	0.812629
9_70994210	9	70994210	+	ENSSSCG00000015307	CDK14	0.817481
9_70994556	9	70994556	+	ENSSSCG00000015307	CDK14	0.808576
9_70995092	9	70995092	+	ENSSSCG00000015307	CDK14	0.808555
9_70995529	9	70995529	+	ENSSSCG00000015307	CDK14	0.817762
9_70995815	9	70995815	+	ENSSSCG00000015307	CDK14	0.841092
9_70996378	9	70996378	+	ENSSSCG00000015307	CDK14	0.817762
9_70996649	9	70996649	+	ENSSSCG00000015307	CDK14	0.821453
9_70996766	9	70996766	+	ENSSSCG00000015307	CDK14	0.83544
9_70996984	9	70996984	+	ENSSSCG00000015307	CDK14	0.817762
9_70997054	9	70997054	+	ENSSSCG00000015307	CDK14	0.815915
9_70997642	9	70997642	+	ENSSSCG00000015307	CDK14	0.773963
9_70997708	9	70997708	+	ENSSSCG00000015307	CDK14	0.815915
9_70997773	9	70997773	+	ENSSSCG00000015307	CDK14	0.817762
9_70997887	9	70997887	+	ENSSSCG00000015307	CDK14	0.817755
9_70997982	9	70997982	+	ENSSSCG00000015307	CDK14	0.814083
9_70998502	9	70998502	+	ENSSSCG00000015307	CDK14	0.797533
9_70998503	9	70998503	+	ENSSSCG00000015307	CDK14	0.797533
9_70998521	9	70998521	+	ENSSSCG00000015307	CDK14	0.797533
9_70999233	9	70999233	+	ENSSSCG00000015307	CDK14	0.812232
9_70999824	9	70999824	+	ENSSSCG00000015307	CDK14	0.812225
9_71000448	9	71000448	+	ENSSSCG00000015307	CDK14	0.810403
9_71000569	9	71000569	+	ENSSSCG00000015307	CDK14	0.81961
9_71000601	9	71000601	+	ENSSSCG00000015307	CDK14	0.817762
9_71000840	9	71000840	+	ENSSSCG00000015307	CDK14	0.824353
9_71001101	9	71001101	+	ENSSSCG00000015307	CDK14	0.822531
9_71001360	9	71001360	+	ENSSSCG00000015307	CDK14	0.822531
9_71001377	9	71001377	+	ENSSSCG00000015307	CDK14	0.822538
9_71001400	9	71001400	+	ENSSSCG00000015307	CDK14	0.822538
9_71001510	9	71001510	+	ENSSSCG00000015307	CDK14	0.82071
9_71001645	9	71001645	+	ENSSSCG00000015307	CDK14	0.822538
9_71001828	9	71001828	+	ENSSSCG00000015307	CDK14	0.820703
9_71001861	9	71001861	+	ENSSSCG00000015307	CDK14	0.822524
9_71002445	9	71002445	+	ENSSSCG00000015307	CDK14	0.822531
9_71003727	9	71003727	+	ENSSSCG00000015307	CDK14	0.818884
9_71003767	9	71003767	+	ENSSSCG00000015307	CDK14	0.822531
9_71004740	9	71004740	+	ENSSSCG00000015307	CDK14	0.82619
9_71004900	9	71004900	+	ENSSSCG00000015307	CDK14	0.84369
9_71004926	9	71004926	+	ENSSSCG00000015307	CDK14	0.82619
9_71005207	9	71005207	+	ENSSSCG00000015307	CDK14	0.820703
9_71005226	9	71005226	+	ENSSSCG00000015307	CDK14	0.818877
9_71005392	9	71005392	+	ENSSSCG00000015307	CDK14	0.82436
9_71005570	9	71005570	+	ENSSSCG00000015307	CDK14	0.845546
9_71005820	9	71005820	+	ENSSSCG00000015307	CDK14	0.818898
9_71005900	9	71005900	+	ENSSSCG00000015307	CDK14	0.834649
9_71006196	9	71006196	+	ENSSSCG00000015307	CDK14	0.82619
9_71008631	9	71008631	+	ENSSSCG00000015307	CDK14	0.82436
9_71009652	9	71009652	+	ENSSSCG00000015307	CDK14	0.783021
9_71009690	9	71009690	+	ENSSSCG00000015307	CDK14	0.775762
9_71012869	9	71012869	+	ENSSSCG00000015307	CDK14	0.822545
9_71012993	9	71012993	+	ENSSSCG00000015307	CDK14	0.82436
9_71013547	9	71013547	+	ENSSSCG00000015307	CDK14	0.82071
9_71013628	9	71013628	+	ENSSSCG00000015307	CDK14	0.822531
9_71013883	9	71013883	+	ENSSSCG00000015307	CDK14	0.818898
9_71017212	9	71017212	+	ENSSSCG00000015307	CDK14	0.843944
9_71019515	9	71019515	+	ENSSSCG00000015307	CDK14	0.845553
9_71019642	9	71019642	+	ENSSSCG00000015307	CDK14	0.843944
9_71019941	9	71019941	+	ENSSSCG00000015307	CDK14	0.845546
9_71020139	9	71020139	+	ENSSSCG00000015307	CDK14	0.757771
9_71020186	9	71020186	+	ENSSSCG00000015307	CDK14	0.754176
9_71020403	9	71020403	+	ENSSSCG00000015307	CDK14	0.757757
9_71020711	9	71020711	+	ENSSSCG00000015307	CDK14	0.747004
9_71021174	9	71021174	+	ENSSSCG00000015307	CDK14	0.731046
9_71025456	9	71025456	+	ENSSSCG00000015307	CDK14	0.823277
9_71025826	9	71025826	+	ENSSSCG00000015307	CDK14	0.832817
9_71026694	9	71026694	+	ENSSSCG00000015307	CDK14	0.841815
9_71026740	9	71026740	+	ENSSSCG00000015307	CDK14	0.839955
9_71027160	9	71027160	+	ENSSSCG00000015307	CDK14	0.841808
9_71027178	9	71027178	+	ENSSSCG00000015307	CDK14	0.839948
9_71027180	9	71027180	+	ENSSSCG00000015307	CDK14	0.839948
9_71027304	9	71027304	+	ENSSSCG00000015307	CDK14	0.84021
9_71027417	9	71027417	+	ENSSSCG00000015307	CDK14	0.843683
9_71027439	9	71027439	+	ENSSSCG00000015307	CDK14	0.845553
9_71028740	9	71028740	+	ENSSSCG00000015307	CDK14	0.845553
9_71028995	9	71028995	+	ENSSSCG00000015307	CDK14	0.843683
9_71030168	9	71030168	+	ENSSSCG00000015307	CDK14	0.843683
9_71030600	9	71030600	+	ENSSSCG00000015307	CDK14	0.841815
9_71031539	9	71031539	+	ENSSSCG00000015307	CDK14	0.836226
9_71031990	9	71031990	+	ENSSSCG00000015307	CDK14	0.845553
9_71032875	9	71032875	+	ENSSSCG00000015307	CDK14	0.839962
9_71039576	9	71039576	+	ENSSSCG00000015307	CDK14	0.845546
9_71047342	9	71047342	+	ENSSSCG00000015307	CDK14	0.803041
9_71047362	9	71047362	+	ENSSSCG00000015307	CDK14	0.80122
9_71180067	9	71180067	+	ENSSSCG00000015307	CDK14	0.75535
9_71182326	9	71182326	+	ENSSSCG00000015307	CDK14	0.749343
9_71195145	9	71195145	+	ENSSSCG00000015307	CDK14	0.812126
9_71198471	9	71198471	+	ENSSSCG00000015307	CDK14	0.733767
9_71198606	9	71198606	+	ENSSSCG00000015307	CDK14	0.739841
9_71202293	9	71202293	+	ENSSSCG00000015307	CDK14	0.816244
9_71204263	9	71204263	+	ENSSSCG00000015307	CDK14	0.812133
9_71205852	9	71205852	+	ENSSSCG00000015307	CDK14	0.747944
9_71206643	9	71206643	+	ENSSSCG00000015307	CDK14	0.752032
9_71206690	9	71206690	+	ENSSSCG00000015307	CDK14	0.750002
9_71207376	9	71207376	+	ENSSSCG00000015307	CDK14	0.745911
9_71208552	9	71208552	+	ENSSSCG00000015307	CDK14	0.826906
9_71210301	9	71210301	+	ENSSSCG00000015307	CDK14	0.812735
9_71212145	9	71212145	+	ENSSSCG00000015307	CDK14	0.818428
9_71212232	9	71212232	+	ENSSSCG00000015307	CDK14	0.727658
9_71217908	9	71217908	+	ENSSSCG00000015307	CDK14	0.829025
9_71219488	9	71219488	+	ENSSSCG00000015307	CDK14	0.829025
9_71223202	9	71223202	+	ENSSSCG00000015307	CDK14	0.829025
9_71224427	9	71224427	+	ENSSSCG00000015307	CDK14	0.824781
9_71232137	9	71232137	+	ENSSSCG00000015307	CDK14	0.805802
9_71234580	9	71234580	+	ENSSSCG00000015307	CDK14	0.824781
9_71238497	9	71238497	+	ENSSSCG00000015307	CDK14	0.826906
9_71245862	9	71245862	+	ENSSSCG00000015307	CDK14	0.826906
9_71251818	9	71251818	+	ENSSSCG00000015307	CDK14	0.854856
9_71251923	9	71251923	+	ENSSSCG00000015307	CDK14	0.852692
9_71252308	9	71252308	+	ENSSSCG00000015307	CDK14	0.854856
9_71255272	9	71255272	+	ENSSSCG00000015307	CDK14	0.850538
9_71294729	9	71294729	+	ENSSSCG00000015307	CDK14	0.764727
9_71307734	9	71307734	+	ENSSSCG00000015307	CDK14	0.849474
9_71307973	9	71307973	+	ENSSSCG00000015307	CDK14	0.849474
9_71308268	9	71308268	+	ENSSSCG00000015307	CDK14	0.843222
9_72211466	9	72211466	+	ENSSSCG00000015314	ANKIB1	0.728355
9_72758216	9	72758216	-	ENSSSCG00000040183	CDK6	0.727751
9_75002813	9	75002813	-	ENSSSCG00000029515	PON3	0.860013
9_75967862	9	75967862	-	ENSSSCG00000015336	SLC25A13	0.74863
9_78934177	9	78934177	+	ENSSSCG00000037207	NXPH1	0.743342
9_78943738	9	78943738	+	ENSSSCG00000037207	NXPH1	0.745817
9_80779845	9	80779845	+	ENSSSCG00000026722	PHF14	0.926959
9_83711552	9	83711552	-	ENSSSCG00000015355	DGKB	0.906658
9_84085685	9	84085685	-	ENSSSCG00000015355	DGKB	0.797488
9_91014620	9	91014620	-	ENSSSCG00000015383	RAPGEF5	0.862047
9_93666377	9	93666377	+	ENSSSCG00000015394	ELAPOR2	0.748798
9_96866821	9	96866821	+	ENSSSCG00000015399	SEMA3E	0.859189
9_118375682	9	118375682	+	ENSSSCG00000015512	PAPPA2	0.859176
9_125932129	9	125932129	-	ENSSSCG00000015566	EDEM3	0.894497
9_125932478	9	125932478	-	ENSSSCG00000015566	EDEM3	0.755266
9_128495572	9	128495572	-	ENSSSCG00000023451	KCNK2	0.858498
9_128655666	9	128655666	-	ENSSSCG00000023451	KCNK2	0.752149
9_128655682	9	128655682	-	ENSSSCG00000023451	KCNK2	0.750178
9_128658915	9	128658915	-	ENSSSCG00000023451	KCNK2	0.756733
9_129154515	9	129154515	+	ENSSSCG00000015582	PTPN14	0.866124
9_129154549	9	129154549	+	ENSSSCG00000015582	PTPN14	0.864393
9_129154600	9	129154600	+	ENSSSCG00000015582	PTPN14	0.854016
9_129575010	9	129575010	-	ENSSSCG00000015584	PROX1	0.762108
10_1354284	10	1354284	-	ENSSSCG00000040323	RGS21	0.734488
10_1355106	10	1355106	-	ENSSSCG00000040323	RGS21	0.739299
10_1359515	10	1359515	-	ENSSSCG00000040323	RGS21	0.739308
10_1360015	10	1360015	-	ENSSSCG00000040323	RGS21	0.736887
10_1360187	10	1360187	-	ENSSSCG00000040323	RGS21	0.734479
10_1360300	10	1360300	-	ENSSSCG00000040323	RGS21	0.734488
10_1360310	10	1360310	-	ENSSSCG00000040323	RGS21	0.734488
10_1360469	10	1360469	-	ENSSSCG00000040323	RGS21	0.727278
10_1360898	10	1360898	-	ENSSSCG00000040323	RGS21	0.734003
10_1361122	10	1361122	-	ENSSSCG00000040323	RGS21	0.729249
10_1361254	10	1361254	-	ENSSSCG00000040323	RGS21	0.738779
10_1362148	10	1362148	-	ENSSSCG00000040323	RGS21	0.738779
10_1362899	10	1362899	-	ENSSSCG00000040323	RGS21	0.741165
10_3307290	10	3307290	+	ENSSSCG00000010809	BRINP3	0.752455
10_3307293	10	3307293	+	ENSSSCG00000010809	BRINP3	0.752455
10_3307553	10	3307553	+	ENSSSCG00000010809	BRINP3	0.754574
10_3308446	10	3308446	+	ENSSSCG00000010809	BRINP3	0.756735
10_3308634	10	3308634	+	ENSSSCG00000010809	BRINP3	0.752447
10_3309831	10	3309831	+	ENSSSCG00000010809	BRINP3	0.761025
10_3309839	10	3309839	+	ENSSSCG00000010809	BRINP3	0.761025
10_3310207	10	3310207	+	ENSSSCG00000010809	BRINP3	0.756735
10_3311063	10	3311063	+	ENSSSCG00000010809	BRINP3	0.741826
10_3311083	10	3311083	+	ENSSSCG00000010809	BRINP3	0.761033
10_3311206	10	3311206	+	ENSSSCG00000010809	BRINP3	0.73969
10_3311598	10	3311598	+	ENSSSCG00000010809	BRINP3	0.756735
10_3312395	10	3312395	+	ENSSSCG00000010809	BRINP3	0.765318
10_3312657	10	3312657	+	ENSSSCG00000010809	BRINP3	0.756735
10_3312702	10	3312702	+	ENSSSCG00000010809	BRINP3	0.756735
10_3312856	10	3312856	+	ENSSSCG00000010809	BRINP3	0.758883
10_3313047	10	3313047	+	ENSSSCG00000010809	BRINP3	0.763163
10_3313102	10	3313102	+	ENSSSCG00000010809	BRINP3	0.750228
10_3313130	10	3313130	+	ENSSSCG00000010809	BRINP3	0.752455
10_3313767	10	3313767	+	ENSSSCG00000010809	BRINP3	0.761018
10_7990949	10	7990949	+	ENSSSCG00000029778	SPATA17	0.856203
10_17881060	10	17881060	+	ENSSSCG00000010879	KIF26B	0.726221
10_19085112	10	19085112	+	ENSSSCG00000010882	CNST	0.822916
10_19981306	10	19981306	-	ENSSSCG00000010896	ASPM	0.739293
10_25285550	10	25285550	+	ENSSSCG00000011167	ZNF782	0.748505
10_31008905	10	31008905	+	ENSSSCG00000034203	C9orf64	0.758814
10_46836960	10	46836960	+	ENSSSCG00000011049	DCLRE1C	0.850471
11_7556280	11	7556280	+	ENSSSCG00000009331	MEDAG	0.765733
11_7556678	11	7556678	+	ENSSSCG00000009331	MEDAG	0.756782
11_11335614	11	11335614	+	ENSSSCG00000034348	NBEA	0.772848
11_12089197	11	12089197	-	ENSSSCG00000033919	DCLK1	0.877237
11_14705303	11	14705303	+	ENSSSCG00000009369	COG6	0.820117
11_15722087	11	15722087	-	ENSSSCG00000035658	VPS36	0.769673
11_15722304	11	15722304	-	ENSSSCG00000035658	VPS36	0.750596
11_15723711	11	15723711	-	ENSSSCG00000035658	VPS36	0.754812
11_15723968	11	15723968	-	ENSSSCG00000035658	VPS36	0.740077
11_15724430	11	15724430	-	ENSSSCG00000035658	VPS36	0.767555
11_16032696	11	16032696	+	ENSSSCG00000041795	TMEM272	0.936246
11_19181606	11	19181606	+	ENSSSCG00000009400	RCBTB2	0.84484
11_62960198	11	62960198	+	ENSSSCG00000009489	GPC6	0.877571
11_62960847	11	62960847	+	ENSSSCG00000009489	GPC6	0.885124
11_62961297	11	62961297	+	ENSSSCG00000009489	GPC6	0.88702
11_62961849	11	62961849	+	ENSSSCG00000009489	GPC6	0.877584
11_62961868	11	62961868	+	ENSSSCG00000009489	GPC6	0.885131
11_62961915	11	62961915	+	ENSSSCG00000009489	GPC6	0.88323
11_62961916	11	62961916	+	ENSSSCG00000009489	GPC6	0.88323
11_62961954	11	62961954	+	ENSSSCG00000009489	GPC6	0.883237
11_63626204	11	63626204	-	ENSSSCG00000009490	DCT	0.755176
11_65456455	11	65456455	-	ENSSSCG00000009502	UGGT2	0.833073
11_65526246	11	65526246	+	ENSSSCG00000009503	HS6ST3	0.744237
11_75322607	11	75322607	-	ENSSSCG00000040130	FAM155A	0.811151
11_78531371	11	78531371	+	ENSSSCG00000009558	F10	0.727797
12_5576872	12	5576872	+	ENSSSCG00000017200	UNC13D	0.788037
12_5755732	12	5755732	+	ENSSSCG00000023978	RECQL5	0.749013
12_5755732	12	5755732	-	ENSSSCG00000038844	SMIM5	0.749013
12_11620603	12	11620603	+	ENSSSCG00000017258	FAM20A	0.76093
12_11631639	12	11631639	+	ENSSSCG00000017258	FAM20A	0.745547
12_34031802	12	34031802	-	ENSSSCG00000035193	MRPS23	0.753609
12_41623665	12	41623665	+	ENSSSCG00000040177	ASIC2	0.729314
12_53486525	12	53486525	+	ENSSSCG00000038726	RANGRF	0.779912
12_53486525	12	53486525	-	ENSSSCG00000022395	SLC25A35	0.779912
13_4288438	13	4288438	-	ENSSSCG00000011199	TBC1D5	0.766026
13_4289173	13	4289173	-	ENSSSCG00000011199	TBC1D5	0.76992
13_4289292	13	4289292	-	ENSSSCG00000011199	TBC1D5	0.771862
13_4289332	13	4289332	-	ENSSSCG00000011199	TBC1D5	0.76992
13_4289415	13	4289415	-	ENSSSCG00000011199	TBC1D5	0.739062
13_4289702	13	4289702	-	ENSSSCG00000011199	TBC1D5	0.767972
13_4289712	13	4289712	-	ENSSSCG00000011199	TBC1D5	0.766026
13_7036944	13	7036944	+	ENSSSCG00000024621	KAT2B	0.727909
13_7039762	13	7039762	+	ENSSSCG00000024621	KAT2B	0.727909
13_7039779	13	7039779	+	ENSSSCG00000024621	KAT2B	0.727909
13_7040132	13	7040132	+	ENSSSCG00000024621	KAT2B	0.727909
13_7049021	13	7049021	+	ENSSSCG00000024621	KAT2B	0.739216
13_7052258	13	7052258	+	ENSSSCG00000024621	KAT2B	0.739216
13_7053814	13	7053814	+	ENSSSCG00000024621	KAT2B	0.739216
13_7054134	13	7054134	+	ENSSSCG00000024621	KAT2B	0.739216
13_7056277	13	7056277	+	ENSSSCG00000024621	KAT2B	0.739216
13_18330144	13	18330144	+	ENSSSCG00000022618	CMTM8	0.836277
13_18330154	13	18330154	+	ENSSSCG00000022618	CMTM8	0.836277
13_18330792	13	18330792	+	ENSSSCG00000022618	CMTM8	0.741256
13_25255477	13	25255477	-	ENSSSCG00000025408	ULK4	0.870542
13_30405319	13	30405319	-	ENSSSCG00000039224	CSPG5	0.758
13_30405804	13	30405804	-	ENSSSCG00000039224	CSPG5	0.755971
13_30406182	13	30406182	-	ENSSSCG00000039224	CSPG5	0.768636
13_30407163	13	30407163	-	ENSSSCG00000039224	CSPG5	0.75821
13_30407474	13	30407474	-	ENSSSCG00000039224	CSPG5	0.758015
13_30408018	13	30408018	-	ENSSSCG00000039224	CSPG5	0.76007
13_30413414	13	30413414	-	ENSSSCG00000011340	SMARCC1	0.762126
13_30413447	13	30413447	-	ENSSSCG00000011340	SMARCC1	0.764185
13_30416216	13	30416216	-	ENSSSCG00000011340	SMARCC1	0.766246
13_30417958	13	30417958	-	ENSSSCG00000011340	SMARCC1	0.768309
13_30420080	13	30420080	-	ENSSSCG00000011340	SMARCC1	0.764185
13_30420322	13	30420322	-	ENSSSCG00000011340	SMARCC1	0.764193
13_30423770	13	30423770	-	ENSSSCG00000011340	SMARCC1	0.751835
13_31763254	13	31763254	-	ENSSSCG00000011377	LAMB2	0.770662
13_33481604	13	33481604	+	ENSSSCG00000011416	DOCK3	0.736795
13_38270267	13	38270267	-	ENSSSCG00000024417	ERC2	0.888723
13_38531276	13	38531276	-	ENSSSCG00000024201	TASOR	0.861367
13_42160333	13	42160333	-	ENSSSCG00000035818	FHIT	0.862096
13_65963696	13	65963696	+	ENSSSCG00000011546	MTMR14	0.740026
13_67343856	13	67343856	+	ENSSSCG00000011576	HRH1	0.734489
13_67345387	13	67345387	+	ENSSSCG00000011576	HRH1	0.749941
13_67345693	13	67345693	+	ENSSSCG00000011576	HRH1	0.747739
13_67693785	13	67693785	+	ENSSSCG00000011575	ATG7	0.780383
13_80937093	13	80937093	+	ENSSSCG00000011666	CLSTN2	0.735059
13_80937121	13	80937121	+	ENSSSCG00000011666	CLSTN2	0.739449
13_80937122	13	80937122	+	ENSSSCG00000011666	CLSTN2	0.739449
13_80937129	13	80937129	+	ENSSSCG00000011666	CLSTN2	0.739449
13_80937182	13	80937182	+	ENSSSCG00000011666	CLSTN2	0.737307
13_80938293	13	80938293	+	ENSSSCG00000011666	CLSTN2	0.737307
13_84399350	13	84399350	-	ENSSSCG00000011686	SLC9A9	0.862208
13_84643990	13	84643990	+	ENSSSCG00000036206	DIPK2A	0.853088
13_90873679	13	90873679	-	ENSSSCG00000022706	ERICH6	0.816121
13_96013320	13	96013320	+	ENSSSCG00000025810	KCNAB1	0.747521
13_98585900	13	98585900	-	ENSSSCG00000028623	RARRES1	0.822608
13_100774794	13	100774794	-	ENSSSCG00000021774	B3GALNT1	0.799779
13_106627446	13	106627446	+	ENSSSCG00000011740	SERPINI1	0.733038
13_126001269	13	126001269	+	ENSSSCG00000011811	LPP	0.78086
13_126022051	13	126022051	+	ENSSSCG00000011811	LPP	0.834293
13_126032666	13	126032666	+	ENSSSCG00000011811	LPP	0.777373
13_126487524	13	126487524	+	ENSSSCG00000011811	LPP	0.753858
13_143915849	13	143915849	+	ENSSSCG00000027941	LSAMP	0.732869
13_144531941	13	144531941	-	ENSSSCG00000031244	GAP43	0.754574
13_144856916	13	144856916	+	ENSSSCG00000026113	ZBTB20	0.851336
13_153809346	13	153809346	-	ENSSSCG00000011946	ALCAM	0.828111
13_192312142	13	192312142	-	ENSSSCG00000030528	LTN1	0.770574
13_192312143	13	192312143	-	ENSSSCG00000030528	LTN1	0.770574
13_192312149	13	192312149	-	ENSSSCG00000030528	LTN1	0.770574
13_192312263	13	192312263	-	ENSSSCG00000030528	LTN1	0.79507
13_192312351	13	192312351	-	ENSSSCG00000030528	LTN1	0.772953
13_192312364	13	192312364	-	ENSSSCG00000030528	LTN1	0.772953
13_192383350	13	192383350	+	ENSSSCG00000027594	USP16	0.772648
14_31556884	14	31556884	+	ENSSSCG00000009818	IFT81	0.760802
14_33824638	14	33824638	-	ENSSSCG00000009845	SRRM4	0.776614
14_45469163	14	45469163	-	ENSSSCG00000009968	TTC28	0.774526
14_45470096	14	45470096	-	ENSSSCG00000009968	TTC28	0.755045
14_45470097	14	45470097	-	ENSSSCG00000009968	TTC28	0.755045
14_45602780	14	45602780	-	ENSSSCG00000009968	TTC28	0.889584
14_47005710	14	47005710	+	ENSSSCG00000009994	MTMR3	0.882615
14_47650253	14	47650253	+	ENSSSCG00000010015	OSBP2	0.786311
14_47895001	14	47895001	+	ENSSSCG00000010017	SMTN	0.812316
14_81494679	14	81494679	+	ENSSSCG00000010329	ZMIZ1	0.818128
14_87180052	14	87180052	-	ENSSSCG00000010352	GRID1	0.786124
14_87744759	14	87744759	+	ENSSSCG00000010360	BMPR1A	0.730148
14_87749412	14	87749412	+	ENSSSCG00000010360	BMPR1A	0.738425
14_87751992	14	87751992	+	ENSSSCG00000010360	BMPR1A	0.728084
14_87752293	14	87752293	+	ENSSSCG00000010360	BMPR1A	0.73636
14_87754501	14	87754501	+	ENSSSCG00000010360	BMPR1A	0.732221
14_87757510	14	87757510	+	ENSSSCG00000010360	BMPR1A	0.730132
14_87816548	14	87816548	+	ENSSSCG00000010360	BMPR1A	0.730638
14_87818544	14	87818544	+	ENSSSCG00000010360	BMPR1A	0.72448
14_89112702	14	89112702	+	ENSSSCG00000010380	MAPK8	0.742416
14_89113509	14	89113509	+	ENSSSCG00000010380	MAPK8	0.726745
14_115680753	14	115680753	+	ENSSSCG00000010617	SORCS3	0.806525
14_115794162	14	115794162	+	ENSSSCG00000010617	SORCS3	0.796757
14_129611113	14	129611113	+	ENSSSCG00000010687	INPP5F	0.73449
14_130438475	14	130438475	+	ENSSSCG00000010691	PLPP4	0.801982
14_131764324	14	131764324	+	ENSSSCG00000037530	TACC2	0.846393
14_135901002	14	135901002	-	ENSSSCG00000010747	C10orf90	0.792152
14_135901005	14	135901005	-	ENSSSCG00000010747	C10orf90	0.790431
14_135901008	14	135901008	-	ENSSSCG00000010747	C10orf90	0.790431
14_135901034	14	135901034	-	ENSSSCG00000010747	C10orf90	0.796227
14_135901067	14	135901067	-	ENSSSCG00000010747	C10orf90	0.792773
14_135931682	14	135931682	-	ENSSSCG00000010747	C10orf90	0.824839
14_136485958	14	136485958	+	ENSSSCG00000035045	DOCK1	0.780841
14_139095622	14	139095622	+	ENSSSCG00000010759	GLRX3	0.842352
14_139095890	14	139095890	+	ENSSSCG00000010759	GLRX3	0.849112
15_276046	15	276046	+	ENSSSCG00000029073	CACNB4	0.796954
15_4053898	15	4053898	-	ENSSSCG00000015667	MBD5	0.844883
15_8031355	15	8031355	+	ENSSSCG00000015670	GTDC1	0.870693
15_26946576	15	26946576	-	ENSSSCG00000015726	CNTNAP5	0.734749
15_29849103	15	29849103	+	ENSSSCG00000039157	CLASP1	0.765747
15_50726901	15	50726901	-	ENSSSCG00000015830	UNC5D	0.78793
15_50726947	15	50726947	-	ENSSSCG00000015830	UNC5D	0.782669
15_59237422	15	59237422	-	ENSSSCG00000015857	UGGT1	0.72762
15_60110316	15	60110316	+	ENSSSCG00000015866	FMNL2	0.752307
15_60111013	15	60111013	+	ENSSSCG00000015866	FMNL2	0.740507
15_60113391	15	60113391	+	ENSSSCG00000015866	FMNL2	0.758249
15_66902771	15	66902771	-	ENSSSCG00000015885	PLA2R1	0.844438
15_66940847	15	66940847	-	ENSSSCG00000015885	PLA2R1	0.832045
15_68294536	15	68294536	+	ENSSSCG00000015893	SLC4A10	0.804849
15_68604407	15	68604407	+	ENSSSCG00000015893	SLC4A10	0.752285
15_68605510	15	68605510	+	ENSSSCG00000015893	SLC4A10	0.754163
15_68607091	15	68607091	+	ENSSSCG00000015893	SLC4A10	0.756028
15_68608074	15	68608074	+	ENSSSCG00000015893	SLC4A10	0.756028
15_68611094	15	68611094	+	ENSSSCG00000015893	SLC4A10	0.754156
15_69202967	15	69202967	-	ENSSSCG00000015898	KCNH7	0.751811
15_69203516	15	69203516	-	ENSSSCG00000015898	KCNH7	0.728295
15_69205700	15	69205700	-	ENSSSCG00000015898	KCNH7	0.728287
15_69236219	15	69236219	-	ENSSSCG00000015898	KCNH7	0.880892
15_69242508	15	69242508	-	ENSSSCG00000015898	KCNH7	0.882845
15_69260921	15	69260921	-	ENSSSCG00000015898	KCNH7	0.847978
15_69410929	15	69410929	-	ENSSSCG00000015898	KCNH7	0.728601
15_69502073	15	69502073	-	ENSSSCG00000015898	KCNH7	0.741954
15_69518131	15	69518131	-	ENSSSCG00000015898	KCNH7	0.732081
15_71173248	15	71173248	-	ENSSSCG00000015901	GRB14	0.843203
15_71242687	15	71242687	-	ENSSSCG00000015901	GRB14	0.801233
15_72212707	15	72212707	+	ENSSSCG00000015906	CSRNP3	0.797274
15_72569632	15	72569632	-	ENSSSCG00000024204	SCN1A	0.808021
15_75994887	15	75994887	-	ENSSSCG00000015935	CCDC173	0.728365
15_76139632	15	76139632	+	ENSSSCG00000015940	UBR3	0.792774
15_100891553	15	100891553	-	ENSSSCG00000016074	ANKRD44	0.728941
15_104190703	15	104190703	+	ENSSSCG00000029606	AOX1	0.73857
15_108583372	15	108583372	+	ENSSSCG00000016123	PARD3B	0.82332
15_129309388	15	129309388	-	ENSSSCG00000016256	SPHKAP	0.774505
15_129309586	15	129309586	-	ENSSSCG00000016256	SPHKAP	0.770367
15_129323306	15	129323306	-	ENSSSCG00000016256	SPHKAP	0.863245
15_132589115	15	132589115	+	ENSSSCG00000022177	DIS3L2	0.724081
15_132988311	15	132988311	-	ENSSSCG00000016285	ECEL1	0.725826
15_135789471	15	135789471	+	ENSSSCG00000016317	AGAP1	0.875791
16_782313	16	782313	-	ENSSSCG00000016780	CTNND2	0.847912
16_782394	16	782394	-	ENSSSCG00000016780	CTNND2	0.854815
16_782506	16	782506	-	ENSSSCG00000016780	CTNND2	0.845108
16_791126	16	791126	-	ENSSSCG00000016780	CTNND2	0.87457
16_6025546	16	6025546	-	ENSSSCG00000016794	MYO10	0.864596
16_8285184	16	8285184	-	ENSSSCG00000026842	CDH18	0.842005
16_9997189	16	9997189	-	ENSSSCG00000016799	CDH12	0.742278
16_9998639	16	9998639	-	ENSSSCG00000016799	CDH12	0.733424
16_9999018	16	9999018	-	ENSSSCG00000016799	CDH12	0.72403
16_9999019	16	9999019	-	ENSSSCG00000016799	CDH12	0.72403
16_9999158	16	9999158	-	ENSSSCG00000016799	CDH12	0.728716
16_10004140	16	10004140	-	ENSSSCG00000016799	CDH12	0.857826
16_20323805	16	20323805	+	ENSSSCG00000016824	RAI14	0.783211
16_20326495	16	20326495	+	ENSSSCG00000016824	RAI14	0.782683
16_71167536	16	71167536	+	ENSSSCG00000017078	GLRA1	0.723963
16_71168095	16	71168095	+	ENSSSCG00000017078	GLRA1	0.763174
17_31819245	17	31819245	-	ENSSSCG00000007142	PANK2	0.836256
17_33028967	17	33028967	-	ENSSSCG00000007172	TMC2	0.80045
17_33380285	17	33380285	-	ENSSSCG00000007179	STK35	0.738171
17_57653938	17	57653938	-	ENSSSCG00000007501	BMP7	0.745936
17_57654217	17	57654217	-	ENSSSCG00000007501	BMP7	0.727842
17_57654235	17	57654235	-	ENSSSCG00000007501	BMP7	0.747795
18_8451552	18	8451552	-	ENSSSCG00000016493	TMEM178B	0.908122
18_20567256	18	20567256	-	ENSSSCG00000016590	SND1	0.759477
18_20567431	18	20567431	-	ENSSSCG00000016590	SND1	0.771233
18_20567465	18	20567465	-	ENSSSCG00000016590	SND1	0.767312
18_20567771	18	20567771	-	ENSSSCG00000016590	SND1	0.761455
18_20567784	18	20567784	-	ENSSSCG00000016590	SND1	0.753665
18_20568068	18	20568068	-	ENSSSCG00000016590	SND1	0.759492
18_20568114	18	20568114	-	ENSSSCG00000016590	SND1	0.757545
18_21738080	18	21738080	+	ENSSSCG00000022865	GRM8	0.78177
18_26407015	18	26407015	-	ENSSSCG00000016621	KCND2	0.837505
18_28748098	18	28748098	-	ENSSSCG00000016626	CFTR	0.838562
18_28748323	18	28748323	-	ENSSSCG00000016626	CFTR	0.754347
18_31416605	18	31416605	-	ENSSSCG00000016639	FOXP2	0.735396
18_31416618	18	31416618	-	ENSSSCG00000016639	FOXP2	0.735755
18_33868691	18	33868691	+	ENSSSCG00000025602	DOCK4	0.726192
18_37827171	18	37827171	-	ENSSSCG00000039703	EEPD1	0.773964
18_37876739	18	37876739	-	ENSSSCG00000039703	EEPD1	0.758724
18_37877360	18	37877360	-	ENSSSCG00000039703	EEPD1	0.760465
18_37877644	18	37877644	-	ENSSSCG00000039703	EEPD1	0.76048
18_37877869	18	37877869	-	ENSSSCG00000039703	EEPD1	0.762222
18_37883664	18	37883664	-	ENSSSCG00000039703	EEPD1	0.830204
18_38897633	18	38897633	+	ENSSSCG00000027063	DPY19L1	0.753073
18_41089501	18	41089501	+	ENSSSCG00000016668	PDE1C	0.745384
18_41304475	18	41304475	+	ENSSSCG00000016668	PDE1C	0.751135
18_43564604	18	43564604	+	ENSSSCG00000016688	CPVL	0.726079
18_43564615	18	43564615	+	ENSSSCG00000016688	CPVL	0.726072
18_43564628	18	43564628	+	ENSSSCG00000016688	CPVL	0.724285
18_43564719	18	43564719	+	ENSSSCG00000016688	CPVL	0.726057
18_43565292	18	43565292	+	ENSSSCG00000016688	CPVL	0.724255
18_43565684	18	43565684	+	ENSSSCG00000016688	CPVL	0.726072
18_43566639	18	43566639	+	ENSSSCG00000016688	CPVL	0.731427
18_43567316	18	43567316	+	ENSSSCG00000016688	CPVL	0.729636
18_43567431	18	43567431	+	ENSSSCG00000016688	CPVL	0.724292
18_44013474	18	44013474	-	ENSSSCG00000016690	CREB5	0.725587
18_44017053	18	44017053	-	ENSSSCG00000016690	CREB5	0.784277
18_47575235	18	47575235	+	ENSSSCG00000016716	GSDME	0.81684
18_50034661	18	50034661	+	ENSSSCG00000050056	CCDC201	0.738898
18_53743403	18	53743403	-	ENSSSCG00000035581	SUGCT	0.808191
18_55450641	18	55450641	+	ENSSSCG00000016772	VPS41	0.814957

## Sheet: Supplementary Table S8
Supplementary Table S8. Percentage of significant loci passing Fisher test (p-value<0.05) in total loci between LI and other Chinese pigs and between LI and commercial pigs.
GENE	Significant loci / Total loci (Percentage) (between LI and other Chinese pigs)	Significant loci / Total loci (Percentage) (between LI and commercial pigs)
ANKRD44	1743/2997 (58.16%)	140/2997 (4.67%)
DGKB	2439/3960 (61.59%)	458/3960 (11.57%)
HDAC11	47/119 (39.50%)	31/119 (26.05%)
KCNH7	1768/2490 (71.00%)	32/2490 (1.29%)
KCNIP4	6273/15932 (39.37%)	6769/15932 (42.49%)
NR6A1	989/1436 (68.87%)	525/1436 (36.56%)
PAPPA2	926/1518 (61.00%)	888/1518 (58.50%)
PGM5	1075/1694 (63.46%)	505/1694 (29.81%)
PIK3C2B	533/949 (56.16%)	473/949 (49.84%)
PLA2R1	635/1033 (61.74%)	160/1033 (5.49%)
TRIM54	178/277 (64.26%)	11/277 (3.97%)
ZFAT	2155/3478 (61.96%)	155/3478 (4.45%)
ZFPM2	1443/2770 (52.09%)	1000/2770 (36.10%)
